# Supplementary material for: Copper-catalyzed borofunctionalization of styrenes with B2pin2 and CO
Source: Royal Society of Chemistry journal article supplement (doi:10.1039/d1sc04774d), 2021-01-01

## Supporting Information

### Copper-Catalyzed Borofunctionalization of Styrenes with B<sub>2</sub>pin<sub>2</sub> and CO

Yang Yuan,<sup>a,†</sup> Fu-Peng Wu,<sup>a,†</sup> and Xiao-Feng Wu<sup>\*a,b</sup>

<sup>a</sup> Leibniz-Institut für Katalyse e.V., Albert-Einstein-Straße 29a, 18059 Rostock, Germany, E-mail: xiao-feng.wu@catalysis.de

<sup>b</sup> Dalian National Laboratory for Clean Energy, Dalian Institute of Chemical Physics, Chinese Academy of Sciences, 116023, Dalian, Liaoning, China, E-mail: xwu2020@dicp.ac.cn

#### Contents

|                                                                           |    |
|---------------------------------------------------------------------------|----|
| 1. General Information.....                                               | 2  |
| 2. General Procedures.....                                                | 2  |
| 3. Characterization Data.....                                             | 3  |
| 4. Procedure for the synthesis of 6a & 6b.....                            | 20 |
| 5. Procedure for the synthesis of 7.....                                  | 22 |
| 6. Procedure for the synthesis of 5.....                                  | 23 |
| 7. Analysis of the <sup>11</sup> B NMR spectroscopies after reaction..... | 26 |
| 8. References.....                                                        | 27 |
| 9. NMR Spectra.....                                                       | 28 |

## 1. General information

All commercial reagents were purchased from Sigma-Aldrich, Strem, Acros, TCI or Alfa Aesar and used as such unless stated otherwise. Solvents (Anhydrous and under inert atmosphere) were collected from The Solvent purification system by M BRAUN and used under standard schlenk technique. NMR spectra were recorded on Bruker Avance 300 MHz and Bruker ARX 400 MHz spectrometers. Multiplets were assigned as s (singlet), d (doublet), t (triplet), q (quartet), dd (doublet of doublet), m (multiplet) and br. s (broad singlet). Coupling constants reported to 0.5 or 1.0 Hz accuracy. GC-yields were calculated using hexadecane as internal standard. All measurements were carried out at room temperature unless otherwise stated. Electron impact (EI) mass spectra were recorded on AMD 402 mass spectrometer (70 eV). The data are given as mass units per charge (m/z). Gas chromatography analysis was performed on an Agilent HP-7890A instrument with an FID detector and HP-5 capillary column (polydimethylsiloxane with 5% phenyl groups, 30 m, 0.32 mm i.d., 0.25  $\mu\text{m}$  film thickness) using argon as carrier gas. The products were isolated from the reaction mixture by column chromatography on silica gel 60, 0.063-0.2 mm, 70-230 mesh (Merck).

## 2. General Procedures

### General Procedure for Cu-catalyzed Borocarbonylation of Styrenes with $\text{B}_2\text{pin}_2$ and CO.

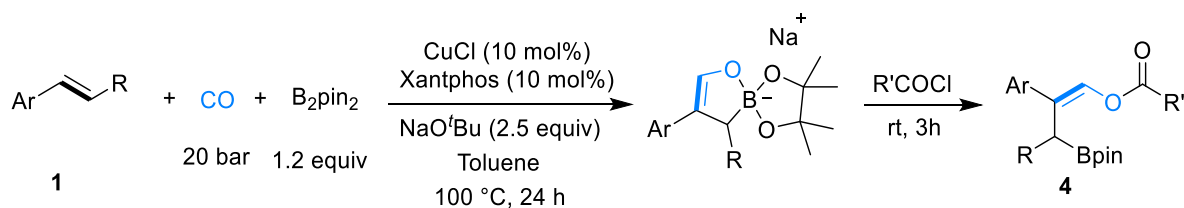

A vial (4 mL) was charged with CuCl (1.98 mg, 10.0 mol%), Xantphos (11.6 mg, 10.0 mol%), NaO<sup>t</sup>Bu (48.1 mg, 2.5 equiv),  $\text{B}_2\text{pin}_2$  (60.1 mg, 1.2 equiv), and a stirring bar. The vial was closed by PTFE/white rubber septum (Wheaton 13 mm Septa) and phenolic cap and connected with atmosphere with a needle. The vial was evacuated under vacuum and recharged with argon for three times. Then, toluene (1.0 mL) was injected under argon by using a syringe. After that, styrenes **1** (0.2 mmol, 1.0 equiv), was added, the vial (or several vials) was placed in an alloy plate, which was transferred into a 300 mL autoclave of the 4560 series from Parr Instruments. After flushing the autoclave three times with CO, a pressure of 20 bar of CO was adjusted at ambient temperature. Then, the reaction was performed for 24 hours at 100 °C. After 24 hours, the autoclave was cooled down with ice water to room temperature and the pressure was

released carefully. Then, Acid chlorides (0.4 mmol, 2.0 equiv) was added to the vials by using a micro syringe, the reaction was stirred for 3 more hours at room temperature. After that, the solution was then filtered through celite and concentrated in vacuo. The residue was purified by column chromatography to afford the corresponding products **4**.

### 3. Characterization Data

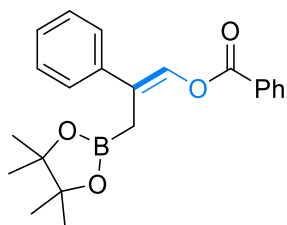

#### **(E)-2-Phenyl-3-(4,4,5,5-tetramethyl-1,3,2-dioxaborolan-2-yl)prop-1-en-1-yl benzoate (4a)**

53.9 mg, 74% yield, colorless oil. Eluent: pentane/ethyl acetate = 30/1-20/1.

$^1\text{H NMR}$  (400 MHz,  $\text{CDCl}_3$ )  $\delta$  8.17 – 8.07 (m, 2H), 7.68 (t,  $J = 1.0$  Hz, 1H), 7.58 – 7.49 (m, 1H), 7.46 – 7.34 (m, 4H), 7.31 – 7.24 (m, 2H), 7.22 – 7.16 (m, 1H), 2.23 (s, 2H), 1.08 (s, 12H).

$^{13}\text{C NMR}$  (101 MHz,  $\text{CDCl}_3$ )  $\delta$  163.5, 139.7, 133.5, 132.1, 130.2, 129.6, 128.6, 128.5, 127.3, 126.4, 123.9, 83.6, 77.5, 77.1, 76.8, 24.7.

$^{11}\text{B NMR}$  (128 MHz,  $\text{CDCl}_3$ )  $\delta$  32.85.

**HRMS** (ESI-TOF)  $m/z$ : Calcd. for  $\text{C}_{22}\text{H}_{25}\text{BO}_4$  [ $\text{M}+\text{Na}$ ] $^+$ : 387.1747, Found: 387.1752.

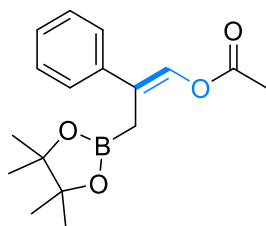

#### **(E)-2-Phenyl-3-(4,4,5,5-tetramethyl-1,3,2-dioxaborolan-2-yl)prop-1-en-1-yl acetate (4b)**

42.3 mg, 70% yield, colorless oil. Eluent: pentane/ethyl acetate = 30/1-20/1.

$^1\text{H NMR}$  (300 MHz,  $\text{CDCl}_3$ )  $\delta$  7.51 (t,  $J = 1.0$  Hz, 1H), 7.43 – 7.38 (m, 2H), 7.36 – 7.24 (m, 3H), 2.22 (s, 3H), 2.20 (s, 2H), 1.18 (s, 12H).

$^{13}\text{C NMR}$  (75 MHz,  $\text{CDCl}_3$ )  $\delta$  168.0, 139.4, 131.9, 128.3, 127.1, 126.2, 123.0, 83.4, 24.6, 20.9.

**HRMS** (ESI-TOF)  $m/z$ : Calcd. for  $\text{C}_{17}\text{H}_{23}\text{BO}_4$  [ $\text{M}+\text{Na}$ ] $^+$ : 325.1589, Found: 325.1591.

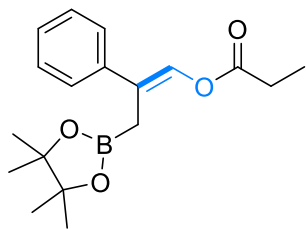

**(E)-2-Phenyl-3-(4,4,5,5-tetramethyl-1,3,2-dioxaborolan-2-yl)prop-1-en-1-yl propionate (4c)**

35.4 mg, 56% yield, colorless oil. Eluent: pentane/ethyl acetate = 30/1-20/1.

**<sup>1</sup>H NMR** (400 MHz, CDCl<sub>3</sub>) δ 7.43 (t, *J* = 1.0 Hz, 1H), 7.32 – 7.28 (m, 2H), 7.26 – 7.20 (m, 2H), 7.19 – 7.14 (m, 1H), 2.41 (q, *J* = 7.5 Hz, 2H), 2.10 (s, 2H), 1.15 (t, *J* = 7.5 Hz, 3H), 1.08 (s, 12H).

**<sup>13</sup>C NMR** (101 MHz, CDCl<sub>3</sub>) δ 171.4, 139.5, 131.9, 128.3, 127.0, 126.2, 122.9, 83.4, 27.6, 24.6, 9.0.

**<sup>11</sup>B NMR** (128 MHz, CDCl<sub>3</sub>) δ 33.02.

**HRMS** (ESI-TOF) *m/z*: Calcd. for C<sub>18</sub>H<sub>25</sub>BO<sub>4</sub> [M+Na]<sup>+</sup>: 339.1746, Found: 339.1749.

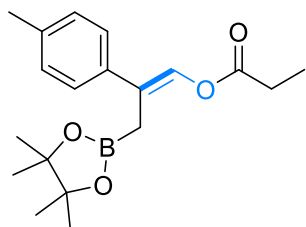

**(E)-3-(4,4,5,5-Tetramethyl-1,3,2-dioxaborolan-2-yl)-2-(p-tolyl)prop-1-en-1-yl propionate (4d)**

45.6 mg, 69% yield, colorless oil. Eluent: pentane/ethyl acetate = 30/1-20/1.

**<sup>1</sup>H NMR** (400 MHz, CDCl<sub>3</sub>) δ 7.51 (s, 1H), 7.32 – 7.27 (m, 2H), 7.17 – 7.10 (m, 2H), 2.50 (q, *J* = 7.5 Hz, 2H), 2.35 (s, 3H), 2.18 (s, 2H), 1.24 (t, *J* = 7.5 Hz, 3H), 1.19 (s, 12H).

**<sup>13</sup>C NMR** (101 MHz, CDCl<sub>3</sub>) δ 171.4, 136.7, 136.5, 131.5, 129.0, 126.0, 122.7, 83.4, 27.6, 24.6, 21.1, 9.0.

**<sup>11</sup>B NMR** (128 MHz, CDCl<sub>3</sub>) δ 32.75.

**HRMS** (ESI-TOF) *m/z*: Calcd. for C<sub>19</sub>H<sub>27</sub>BO<sub>4</sub> [M+Na]<sup>+</sup>: 353.1903, Found: 353.1903.



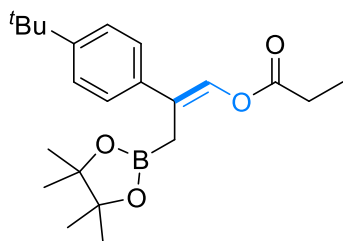

**(E)-2-(4-(tert-Butyl)phenyl)-3-(4,4,5,5-tetramethyl-1,3,2-dioxaborolan-2-yl)prop-1-en-1-yl propionate (4e)**

52.9 mg, 71% yield, colorless oil. Eluent: pentane/ethyl acetate = 30/1-20/1.

<sup>1</sup>H NMR (400 MHz, CDCl<sub>3</sub>) δ 7.52 (t, *J* = 1.0 Hz, 1H), 7.35 (s, 4H), 2.51 (q, *J* = 7.5 Hz, 2H), 2.18 (s, 2H), 1.33 (s, 9H), 1.24 (t, *J* = 7.5 Hz, 3H), 1.19 (s, 12H).

<sup>13</sup>C NMR (101 MHz, CDCl<sub>3</sub>) δ 171.4, 150.0, 136.6, 131.6, 125.9, 125.2, 122.7, 83.4, 34.5, 31.3, 27.6, 24.6, 9.0.

<sup>11</sup>B NMR (128 MHz, CDCl<sub>3</sub>) δ 33.06.

HRMS (ESI-TOF) *m/z*: Calcd. for C<sub>22</sub>H<sub>33</sub>BO<sub>4</sub> [M+Na]<sup>+</sup>: 395.2373, Found: 395.2375.

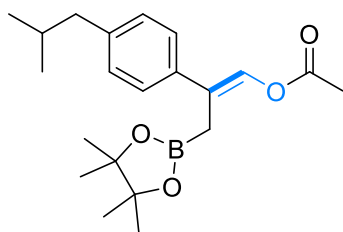

**(E)-2-(4-Isobutylphenyl)-3-(4,4,5,5-tetramethyl-1,3,2-dioxaborolan-2-yl)prop-1-en-1-yl acetate (4f)**

48.7 mg, 68% yield, E/Z = 5/1, colorless oil. Eluent: pentane/ethyl acetate = 30/1-20/1.

<sup>1</sup>H NMR (400 MHz, CDCl<sub>3</sub>) δ 7.49 (t, *J* = 1.0 Hz, 1H), 7.39 – 7.24 (m, 2H), 7.16 – 7.02 (m, 2H), 2.47 (dd, *J* = 7.0, 3.0 Hz, 2H), 2.21 (s, 3H), 2.19 (s, 2H), 1.86 (dt, *J* = 13.5, 7.0 Hz, 1H), 1.18 (s, 12H), 0.91 (d, *J* = 6.0 Hz, 6H).

<sup>13</sup>C NMR (101 MHz, CDCl<sub>3</sub>) δ 168.0, 157.9, 140.6, 136.7, 131.5, 129.1, 129.1, 126.0, 125.9, 122.9, 83.5, 83.4, 45.1, 30.2, 25.0, 24.6, 22.3, 20.9.

<sup>11</sup>B NMR (128 MHz, CDCl<sub>3</sub>) δ 32.67.

HRMS (ESI-TOF) *m/z*: Calcd. for C<sub>22</sub>H<sub>25</sub>BO<sub>4</sub> [M+Na]<sup>+</sup>: 381.2216, Found: 381.2218.

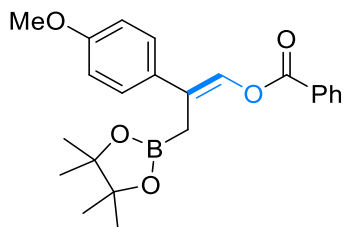

**(E)-2-(4-Methoxyphenyl)-3-(4,4,5,5-tetramethyl-1,3,2-dioxaborolan-2-yl)prop-1-en-1-yl benzoate (4g)**

57.6 mg, 73% yield, colorless oil. Eluent: pentane/ethyl acetate = 20/1-10/1.

**<sup>1</sup>H NMR** (400 MHz, CDCl<sub>3</sub>) δ 8.15 – 7.99 (m, 2H), 7.58 (t, *J* = 1.0 Hz, 1H), 7.51 – 7.44 (m, 1H), 7.40 – 7.32 (m, 2H), 7.31 – 7.24 (m, 2H), 6.82 – 6.71 (m, 2H), 3.70 (s, 3H), 2.17 (s, 2H), 1.04 (s, 12H).

**<sup>13</sup>C NMR** (101 MHz, CDCl<sub>3</sub>) δ 163.4, 159.0, 133.3, 132.0, 131.0, 130.0, 129.6, 128.5, 127.4, 123.3, 113.8, 83.5, 55.3, 24.6.

**<sup>11</sup>B NMR** (128 MHz, CDCl<sub>3</sub>) δ 32.56.

**HRMS** (ESI-TOF) *m/z*: Calcd. for C<sub>23</sub>H<sub>27</sub>BO<sub>5</sub> [M+Na]<sup>+</sup>: 417.1852, Found: 417.1854.

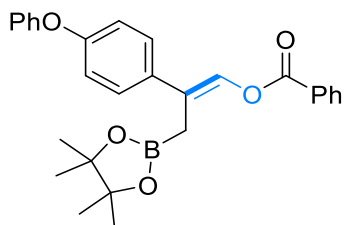

**(E)-2-(4-Phenoxyphenyl)-3-(4,4,5,5-tetramethyl-1,3,2-dioxaborolan-2-yl)prop-1-en-1-yl benzoate (4h)**

62.1 mg, 68% yield, colorless oil. Eluent: pentane/ethyl acetate = 20/1.

**<sup>1</sup>H NMR** (300 MHz, CDCl<sub>3</sub>) δ 8.25 – 8.20 (m, 2H), 7.75 – 7.73 (m, 1H), 7.68 – 7.60 (m, 1H), 7.56 – 7.49 (m, 2H), 7.47 – 7.43 (m, 2H), 7.40 – 7.32 (m, 2H), 7.18 – 7.09 (m, 1H), 7.07 – 6.99 (m, 4H), 2.32 (s, 2H), 1.19 (s, 12H).

**<sup>13</sup>C NMR** (75 MHz, CDCl<sub>3</sub>) δ 163.4, 157.3, 156.5, 134.7, 133.4, 131.6, 130.1, 129.7, 129.5, 128.5, 127.7, 123.2, 118.9, 118.8, 83.5, 24.6.

**<sup>11</sup>B NMR** (96 MHz, CDCl<sub>3</sub>) δ 32.67.

**HRMS** (ESI-TOF) *m/z*: Calcd. for C<sub>28</sub>H<sub>29</sub>BO<sub>5</sub> [M+Na]<sup>+</sup>: 479.2010, Found: 479.2016.

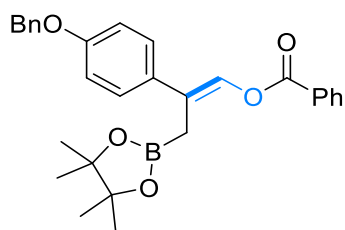

**(E)-2-(4-(Benzyloxy)phenyl)-3-(4,4,5,5-tetramethyl-1,3,2-dioxaborolan-2-yl)prop-1-en-1-yl benzoate (4i)**

59.3 mg, 63% yield, white solid. Eluent: pentane/ethyl acetate = 20/1.

**<sup>1</sup>H NMR** (400 MHz, CDCl<sub>3</sub>) δ 8.24 (dd, *J* = 8.5, 1.5 Hz, 2H), 7.74 (t, *J* = 1.0 Hz, 1H), 7.67 – 7.59 (m, 1H), 7.55 – 7.34 (m, 9H), 6.99 (d, *J* = 9.0 Hz, 2H), 5.11 (s, 2H), 2.32 (s, 2H), 1.19 (s, 12H).

**<sup>13</sup>C NMR** (101 MHz, CDCl<sub>3</sub>) δ 163.4, 158.2, 137.0, 133.4, 132.3, 131.1, 130.1, 129.6, 128.6, 128.5, 128.0, 127.5, 127.4, 123.3, 83.5, 70.0, 24.7.

**<sup>11</sup>B NMR** (128 MHz, CDCl<sub>3</sub>) δ 33.13.

**HRMS** (ESI-TOF) *m/z*: Calcd. for C<sub>29</sub>H<sub>31</sub>BO<sub>5</sub> [M+Na]<sup>+</sup>: 493.2167, Found: 493.2158.

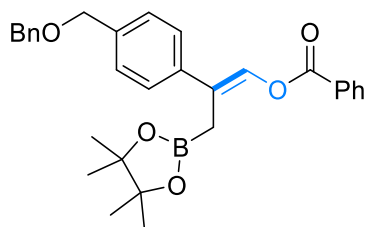

**(E)-2-(4-((Benzyloxy)methyl)phenyl)-3-(4,4,5,5-tetramethyl-1,3,2-dioxaborolan-2-yl)prop-1-en-1-yl benzoate (4j)**

51.3 mg, 53% yield, colorless oil. Eluent: pentane/ethyl acetate = 20/1.

**<sup>1</sup>H NMR** (400 MHz, CDCl<sub>3</sub>) δ 8.25 – 8.18 (m, 2H), 7.78 (s, 1H), 7.66 – 7.57 (m, 1H), 7.54 – 7.43 (m, 4H), 7.40 – 7.32 (m, 6H), 7.35 – 7.28 (m, 1H), 4.57 (s, 2H), 4.56 (s, 2H), 2.31 (s, 2H), 1.17 (s, 12H).

**<sup>13</sup>C NMR** (101 MHz, CDCl<sub>3</sub>) δ 163.4, 138.9, 138.3, 137.2, 133.4, 132.0, 130.1, 129.5, 128.5, 128.4, 127.9, 127.8, 127.7, 126.3, 123.5, 83.5, 72.0, 71.8, 24.7.

**<sup>11</sup>B NMR** (128 MHz, CDCl<sub>3</sub>) δ 32.64.

**HRMS** (ESI-TOF) *m/z*: Calcd. for C<sub>30</sub>H<sub>33</sub>BO<sub>5</sub> [M+Na]<sup>+</sup>: 507.2324, Found: 507.2325.

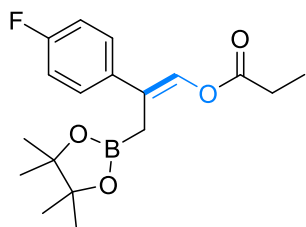

**(E)-2-(4-Fluorophenyl)-3-(4,4,5,5-tetramethyl-1,3,2-dioxaborolan-2-yl)prop-1-en-1-yl propionate (4k)**

41.4 mg, 62% yield, colorless oil. Eluent: pentane/ethyl acetate = 30/1-20/1.

**<sup>1</sup>H NMR** (400 MHz, CDCl<sub>3</sub>) δ 7.43 (s, 1H), 7.36 – 7.31 (m, 2H), 7.04 – 6.94 (m, 2H), 2.48 (q, *J* = 7.5 Hz, 2H), 2.14 (s, 2H), 1.22 (t, *J* = 7.5 Hz, 3H), 1.16 (s, 12H).

**<sup>13</sup>C NMR** (101 MHz, CDCl<sub>3</sub>) δ 171.41, 162.11 (d, *J* = 246.0 Hz), 135.55 (d, *J* = 3.5 Hz), 131.78, 127.79 (d, *J* = 8.0 Hz), 122.05, 115.24, 115.02, 83.48, 27.56, 24.59, 8.97.

**<sup>11</sup>B NMR** (128 MHz, CDCl<sub>3</sub>) δ 32.69.

**<sup>19</sup>F NMR** (282 MHz, CDCl<sub>3</sub>) δ -115.69 – -115.80 (m).

**HRMS** (ESI-TOF) *m/z*: Calcd. for C<sub>18</sub>H<sub>24</sub>BF<sub>4</sub> [M+Na]<sup>+</sup>: 357.1652, Found: 357.1655.

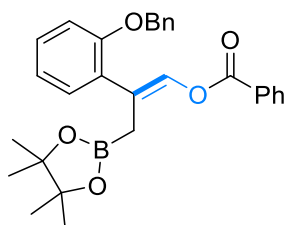

**(E)-2-(2-(Benzyloxy)phenyl)-3-(4,4,5,5-tetramethyl-1,3,2-dioxaborolan-2-yl)prop-1-en-1-yl benzoate (4l)**

57.4 mg, 61% yield, colorless oil. Eluent: pentane/ethyl acetate = 20/1.

**<sup>1</sup>H NMR** (400 MHz, CDCl<sub>3</sub>) δ 8.25 – 8.17 (m, 2H), 7.65 – 7.56 (m, 2H), 7.53 – 7.44 (m, 4H), 7.41 – 7.28 (m, 4H), 7.25 – 7.18 (m, 1H), 6.99 – 6.87 (m, 2H), 5.15 (s, 2H), 2.37 (s, 2H), 1.12 (s, 12H).

**<sup>13</sup>C NMR** (101 MHz, CDCl<sub>3</sub>) δ 163.4, 156.6, 137.3, 133.3, 133.1, 130.6, 130.1, 129.7, 129.4, 128.5, 128.4, 127.7, 127.2, 122.5, 120.8, 112.6, 83.2, 70.3, 24.7.

**<sup>11</sup>B NMR** (128 MHz, CDCl<sub>3</sub>) δ 32.55.

**HRMS** (ESI-TOF) *m/z*: Calcd. for C<sub>29</sub>H<sub>31</sub>BO<sub>5</sub> [M+Na]<sup>+</sup>: 493.2167, Found: 493.2165.

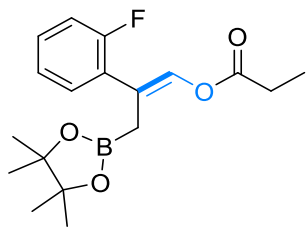

**(E)-2-(2-Fluorophenyl)-3-(4,4,5,5-tetramethyl-1,3,2-dioxaborolan-2-yl)prop-1-en-1-yl propionate (4m)**

38.8 mg, 58% yield, colorless oil. Eluent: pentane/ethyl acetate = 30/1-20/1.

**<sup>1</sup>H NMR** (400 MHz, CDCl<sub>3</sub>) δ 7.44 – 7.40 (m, 1H), 7.34 – 7.28 (m, 1H), 7.27 – 7.18 (m, 1H), 7.15 – 6.99 (m, 2H), 2.51 (q, *J* = 7.5 Hz, 1H), 2.18 (s, 1H), 1.24 (t, *J* = 7.5 Hz, 2H), 1.18 (s, 12H).

**<sup>13</sup>C NMR** (101 MHz, CDCl<sub>3</sub>) δ 171.20, 160.43 (d, *J* = 247.5 Hz), 133.90 (d, *J* = 4.0 Hz), 130.00 (d, *J* = 4.0 Hz), 128.60 (d, *J* = 8.5 Hz), 127.41 (d, *J* = 13.5 Hz), 123.89 (d, *J* = 3.5 Hz), 118.48, 115.82, 115.59, 83.36, 27.54, 24.61, 8.95.

**<sup>11</sup>B NMR** (128 MHz, CDCl<sub>3</sub>) δ 32.53.

**<sup>19</sup>F NMR** (282 MHz, CDCl<sub>3</sub>) δ -113.90 (dt, *J* = 12.2, 6.5 Hz).

**HRMS** (ESI-TOF) *m/z*: Calcd. for C<sub>18</sub>H<sub>24</sub>BF<sub>4</sub> [M+Na]<sup>+</sup>: 357.1652, Found: 357.1651.

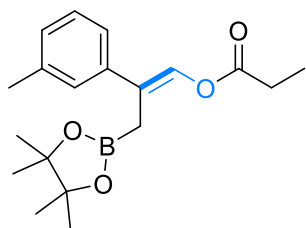

**(E)-3-(4,4,5,5-Tetramethyl-1,3,2-dioxaborolan-2-yl)-2-(m-tolyl)prop-1-en-1-yl propionate (4n)**

43.6 mg, 66% yield, colorless oil. Eluent: pentane/ethyl acetate = 30/1-20/1.

**<sup>1</sup>H NMR** (400 MHz, CDCl<sub>3</sub>) δ 7.51 (s, 1H), 7.21 – 7.17 (m, 3H), 7.05 (ddd, *J* = 4.5, 3.5, 1.0 Hz, 1H), 2.49 (q, *J* = 7.5 Hz, 2H), 2.34 (s, 3H), 2.16 (s, 2H), 1.22 (t, *J* = 7.5 Hz, 3H), 1.17 (s, 11H).

**<sup>13</sup>C NMR** (101 MHz, CDCl<sub>3</sub>) δ 171.4, 139.4, 137.8, 131.8, 128.2, 127.8, 126.9, 123.3, 122.9, 83.4, 27.6, 24.6, 21.5, 9.0.

**<sup>11</sup>B NMR** (128 MHz, CDCl<sub>3</sub>) δ 32.75.

**HRMS** (ESI-TOF) *m/z*: Calcd. for C<sub>19</sub>H<sub>27</sub>BO<sub>4</sub> [M+Na]<sup>+</sup>: 353.1903, Found: 353.1905.

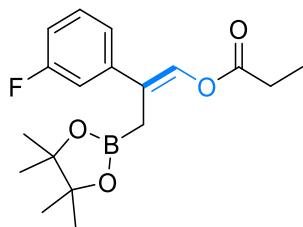

**(E)-2-(3-Fluorophenyl)-3-(4,4,5,5-tetramethyl-1,3,2-dioxaborolan-2-yl)prop-1-en-1-yl propionate (4o)**

41.4 mg, 62% yield, colorless oil. Eluent: pentane/ethyl acetate = 30/1-20/1.

**<sup>1</sup>H NMR** (400 MHz, CDCl<sub>3</sub>) δ 7.54 (t, *J* = 1.0 Hz, 1H), 7.33 – 7.24 (m, 1H), 7.18 (ddd, *J* = 8.0, 1.5, 1.0 Hz, 1H), 7.11 (ddd, *J* = 10.5, 2.5, 2.0 Hz, 1H), 7.00 – 6.90 (m, 1H), 2.51 (q, *J* = 7.5 Hz, 2H), 2.17 (s, 2H), 1.25 (t, *J* = 7.5 Hz, 3H), 1.19 (s, 12H).

**<sup>13</sup>C NMR** (101 MHz, CDCl<sub>3</sub>) δ 171.31, 162.88 (d, *J* = 245.0 Hz), 141.89 (d, *J* = 8.0 Hz), 132.56, 129.71 (d, *J* = 8.5 Hz), 121.93, 121.75 (d, *J* = 3.0 Hz), 113.88, 113.67, 113.24, 113.02, 83.54, 27.55, 24.59, 8.95.

**<sup>11</sup>B NMR** (128 MHz, CDCl<sub>3</sub>) δ 32.7.

**<sup>19</sup>F NMR** (282 MHz, CDCl<sub>3</sub>) δ -113.54 – -113.68 (m).

**HRMS** (ESI-TOF) *m/z*: Calcd. for C<sub>18</sub>H<sub>24</sub>BF<sub>4</sub> [M+Na]<sup>+</sup>: 357.1652, Found: 357.1655.

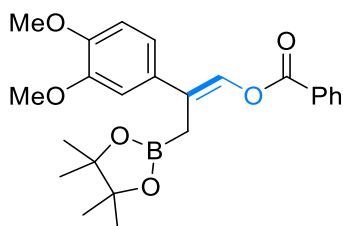

**(E)-2-(3,4-Dimethoxyphenyl)-3-(4,4,5,5-tetramethyl-1,3,2-dioxaborolan-2-yl)prop-1-en-1-yl benzoate (4p)**

52.6 mg, 62% yield, colorless oil. Eluent: pentane/ethyl acetate = 15/1-5/1.

**<sup>1</sup>H NMR** (400 MHz, CDCl<sub>3</sub>) δ 8.19 (dd, *J* = 8.5, 1.5 Hz, 2H), 7.70 (s, 1H), 7.63 – 7.55 (m, 1H), 7.51 – 7.45 (m, 2H), 7.04 – 6.97 (m, 2H), 6.84 (d, *J* = 8.0 Hz, 1H), 3.91 (s, 3H), 3.88 (s, 3H), 2.29 (s, 2H), 1.16 (s, 12H).

**<sup>13</sup>C NMR** (101 MHz, CDCl<sub>3</sub>) δ 163.4, 148.8, 148.4, 133.4, 132.4, 131.2, 130.0, 129.5, 128.5, 123.5, 118.7, 111.1, 109.6, 83.5, 55.9, 55.9, 24.7.

**<sup>11</sup>B NMR** (128 MHz, CDCl<sub>3</sub>) δ 32.59.

**HRMS** (ESI-TOF) *m/z*: Calcd. for C<sub>24</sub>H<sub>29</sub>BO<sub>6</sub> [M+Na]<sup>+</sup>: 447.1959, Found: 447.1959.

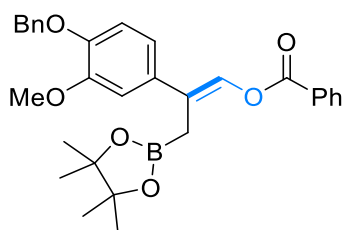

**(E)-2-(4-(Benzyloxy)-3-methoxyphenyl)-3-(4,4,5,5-tetramethyl-1,3,2-dioxaborolan-2-yl)prop-1-en-1-yl benzoate (4q)**

52.0 mg, 52% yield, colorless oil. Eluent: pentane/ethyl acetate = 15/1-5/1.

**<sup>1</sup>H NMR** (400 MHz, CDCl<sub>3</sub>) δ 8.21 – 8.15 (m, 2H), 7.70 (s, 1H), 7.63 – 7.57 (m, 1H), 7.52 – 7.41 (m, 4H), 7.40 – 7.29 (m, 3H), 7.04 (d, *J* = 2.0 Hz, 1H), 6.93 (dd, *J* = 8.5, 2.0 Hz, 1H), 6.85 (d, *J* = 8.5 Hz, 1H), 5.17 (s, 2H), 3.93 (s, 3H), 2.28 (s, 2H), 1.15 (s, 12H).

**<sup>13</sup>C NMR** (101 MHz, CDCl<sub>3</sub>) δ 163.4, 149.5, 147.5, 137.2, 133.4, 133.0, 131.3, 130.0, 129.5, 128.5, 128.5, 127.8, 127.3, 123.5, 118.6, 114.0, 110.1, 83.5, 71.1, 56.0, 24.7.

**<sup>11</sup>B NMR** (128 MHz, CDCl<sub>3</sub>) δ 32.77.

**HRMS** (ESI-TOF) *m/z*: Calcd. for C<sub>30</sub>H<sub>33</sub>BO<sub>6</sub> [M+Na]<sup>+</sup>: 523.2272, Found: 523.2281.

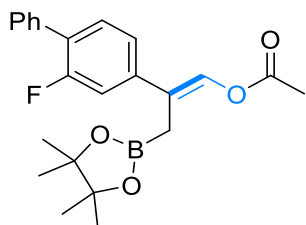

**(E)-2-(2-Fluoro-[1,1'-biphenyl]-4-yl)-3-(4,4,5,5-tetramethyl-1,3,2-dioxaborolan-2-yl)prop-1-en-1-yl acetate (4r)**

49.1 mg, 62% yield, colorless oil. Eluent: pentane/ethyl acetate = 30/1-20/1.

**<sup>1</sup>H NMR** (400 MHz, CDCl<sub>3</sub>) δ 7.51 (t, *J* = 1.0 Hz, 1H), 7.49 – 7.45 (m, 2H), 7.39 – 7.32 (m, 2H), 7.31 – 7.26 (m, 2H), 7.20 – 7.09 (m, 2H), 2.14 (s, 3H), 2.11 (s, 2H), 1.12 (s, 12H).

**<sup>13</sup>C NMR** (101 MHz, CDCl<sub>3</sub>) δ 167.8, 159.7 (d, *J* = 247.5 Hz), 140.7 (d, *J* = 8.0 Hz), 135.6, 132.6, 130.5 (d, *J* = 4.0 Hz), 128.9 (d, *J* = 3.0 Hz), 127.6, 127.5 (d, *J* = 13.5 Hz), 122.0 (d, *J* = 3.0 Hz), 121.7, 113.9, 113.6, 83.6, 24.6, 20.9.

**<sup>11</sup>B NMR** (128 MHz, CDCl<sub>3</sub>) δ 32.65.

**<sup>19</sup>F NMR** (282 MHz, CDCl<sub>3</sub>) δ -118.24 – -118.51 (m).

**HRMS** (ESI-TOF) *m/z*: Calcd. for C<sub>23</sub>H<sub>26</sub>BFO<sub>4</sub> [M+Na]<sup>+</sup>: 419.1809, Found: 419.1810.

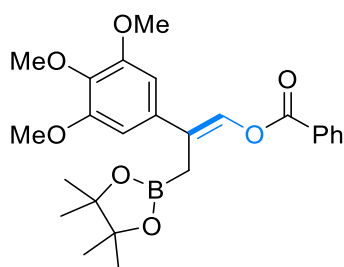

**(E)-3-(4,4,5,5-Tetramethyl-1,3,2-dioxaborolan-2-yl)-2-(3,4,5-trimethoxyphenyl)prop-1-en-1-yl benzoate (4s)**

63.6 mg, 70% yield, colorless oil. Eluent: pentane/ethyl acetate = 15/1-5/1.

<sup>1</sup>H NMR (400 MHz, CDCl<sub>3</sub>) δ 8.09 – 7.88 (m, 2H), 7.51 (s, 1H), 7.44 – 7.36 (m, 1H), 7.32 – 7.21 (m, 2H), 6.49 (s, 2H), 3.69 (s, 6H), 3.64 (s, 3H), 2.08 (s, 2H), 0.96 (s, 12H).

<sup>13</sup>C NMR (101 MHz, CDCl<sub>3</sub>) δ 163.4, 153.1, 137.4, 135.5, 133.5, 131.7, 130.1, 129.4, 128.5, 123.9, 103.6, 83.5, 60.9, 56.1, 24.7.

<sup>11</sup>B NMR (128 MHz, CDCl<sub>3</sub>) δ 32.56.

HRMS (ESI-TOF) m/z: Calcd. for C<sub>25</sub>H<sub>31</sub>BO<sub>7</sub> [M+Na]<sup>+</sup>: 477.2064, Found: 477.2069.

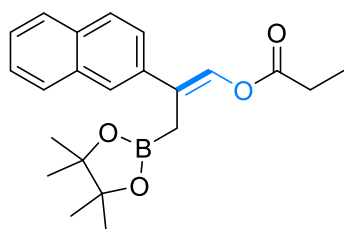

**(E)-2-(Naphthalen-2-yl)-3-(4,4,5,5-tetramethyl-1,3,2-dioxaborolan-2-yl)prop-1-en-1-yl propionate (4t)**

41.7 mg, 57% yield, colorless oil. Eluent: pentane/ethyl acetate = 30/1-20/1.

<sup>1</sup>H NMR (400 MHz, CDCl<sub>3</sub>) δ 7.83 – 7.75 (m, 4H), 7.70 (s, 1H), 7.57 (dd, *J* = 8.5, 2.0 Hz, 1H), 7.49 – 7.40 (m, 2H), 2.52 (q, *J* = 7.5 Hz, 2H), 2.29 (s, 2H), 1.25 (t, *J* = 7.6 Hz, 3H), 1.16 (s, 12H).

<sup>13</sup>C NMR (101 MHz, CDCl<sub>3</sub>) δ 171.4, 136.7, 133.5, 132.6, 132.5, 128.0, 127.9, 127.5, 126.1, 125.6, 124.8, 124.3, 122.6, 83.5, 27.6, 24.6, 9.0.

<sup>11</sup>B NMR (128 MHz, CDCl<sub>3</sub>) δ 32.81.

HRMS (ESI-TOF) m/z: Calcd. for C<sub>22</sub>H<sub>27</sub>BO<sub>4</sub> [M+Na]<sup>+</sup>: 389.1904, Found: 389.1906.



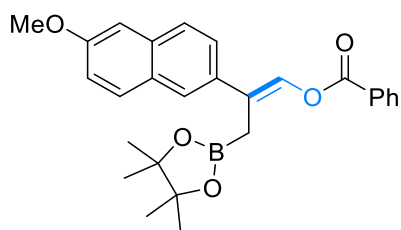

**(E)-2-(6-Methoxynaphthalen-2-yl)-3-(4,4,5,5-tetramethyl-1,3,2-dioxaborolan-2-yl)prop-1-en-1-yl benzoate (4u)**

60.4 mg, 68% yield, white solid. Eluent: pentane/ethyl acetate = 30/1-15/1.

**<sup>1</sup>H NMR** (400 MHz, CDCl<sub>3</sub>) δ 8.30 – 8.22 (m, 2H), 7.94 (s, 1H), 7.83 (d, *J* = 1.5 Hz, 1H), 7.75 (t, *J* = 9.0 Hz, 2H), 7.68 – 7.61 (m, 2H), 7.58 – 7.50 (m, 2H), 7.21 – 7.12 (m, 2H), 3.95 (s, 3H), 2.44 (s, 2H), 1.18 (s, 12H).

**<sup>13</sup>C NMR** (101 MHz, CDCl<sub>3</sub>) δ 163.4, 157.6, 134.5, 133.8, 133.4, 132.0, 130.1, 129.5, 129.5, 129.0, 128.5, 126.8, 125.0, 124.7, 123.6, 118.9, 105.7, 83.5, 55.3, 24.7.

**<sup>11</sup>B NMR** (128 MHz, CDCl<sub>3</sub>) δ 32.69.

**HRMS** (ESI-TOF) *m/z*: Calcd. for C<sub>27</sub>H<sub>29</sub>BO<sub>5</sub> [M+Na]<sup>+</sup>: 467.2010, Found: 467.2018.

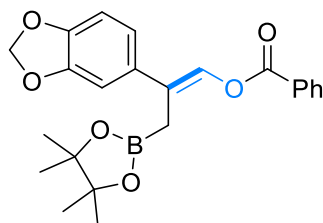

**(E)-2-(Benzo[*d*][1,3]dioxol-5-yl)-3-(4,4,5,5-tetramethyl-1,3,2-dioxaborolan-2-yl)prop-1-en-1-yl benzoate (4v)**

47.4 mg, 58% yield, white solid. Eluent: pentane/ethyl acetate = 30/1-15/1.

**<sup>1</sup>H NMR** (400 MHz, CDCl<sub>3</sub>) δ 8.19 (dd, *J* = 8.5, 1.5 Hz, 2H), 7.66 (t, *J* = 1.0 Hz, 1H), 7.62 – 7.56 (m, 1H), 7.51 – 7.44 (m, 2H), 6.99 – 6.88 (m, 2H), 6.83 – 6.75 (m, 1H), 5.95 (s, 2H), 2.25 (s, 2H), 1.17 (s, 12H).

**<sup>13</sup>C NMR** (101 MHz, CDCl<sub>3</sub>) δ 163.4, 147.7, 146.9, 133.8, 133.4, 131.4, 130.1, 129.5, 128.5, 123.6, 119.8, 108.2, 106.9, 101.0, 83.5, 24.7.

**<sup>11</sup>B NMR** (128 MHz, CDCl<sub>3</sub>) δ 32.27.

**HRMS** (ESI-TOF) *m/z*: Calcd. for C<sub>23</sub>H<sub>25</sub>BO<sub>6</sub> [M+Na]<sup>+</sup>: 431.1646, Found: 431.1644.

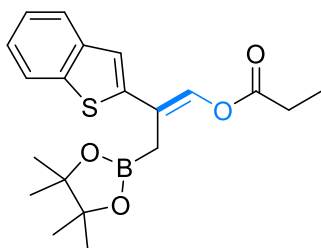

**(E)-2-(Benzo[b]thiophen-2-yl)-3-(4,4,5,5-tetramethyl-1,3,2-dioxaborolan-2-yl)prop-1-en-1-yl propionate (4w)**

40.9 mg, 55% yield, colorless oil. Eluent: pentane/ethyl acetate = 30/1-20/1.

<sup>1</sup>H NMR (400 MHz, CDCl<sub>3</sub>) δ 7.98 – 7.92 (m, 1H), 7.87 – 7.81 (m, 1H), 7.47 (t, *J* = 1.0 Hz, 1H), 7.40 – 7.29 (m, 3H), 2.52 (q, *J* = 7.5 Hz, 2H), 2.22 (s, 2H), 1.24 (t, *J* = 7.5 Hz, 3H), 1.14 (s, 12H).

<sup>13</sup>C NMR (101 MHz, CDCl<sub>3</sub>) δ 171.4, 140.3, 137.9, 135.9, 133.4, 124.2, 124.2, 123.4, 123.3, 122.7, 117.8, 83.5, 27.6, 24.6, 24.6, 9.0.

HRMS (ESI-TOF) *m/z*: Calcd. for C<sub>20</sub>H<sub>25</sub>BO<sub>4</sub>S [M+Na]<sup>+</sup>: 395.1467, Found: 395.1469.

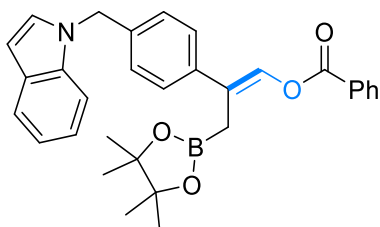

**(E)-2-(4-((1H-Indol-1-yl)methyl)phenyl)-3-(4,4,5,5-tetramethyl-1,3,2-dioxaborolan-2-yl)prop-1-en-1-yl benzoate (4x)**

66.1 mg, 67% yield, yellow oil. Eluent: pentane/ethyl acetate = 30/1-20/1.

<sup>1</sup>H NMR (300 MHz, CDCl<sub>3</sub>) δ 8.29 – 8.19 (m, 2H), 7.77 (t, *J* = 1.0 Hz, 1H), 7.75 – 7.59 (m, 2H), 7.58 – 7.47 (m, 2H), 7.47 – 7.39 (m, 2H), 7.38 – 7.29 (m, 1H), 7.22 – 7.11 (m, 5H), 6.61 (dd, *J* = 3.0, 1.0 Hz, 1H), 5.36 (s, 2H), 2.31 (s, 2H), 1.18 (s, 12H).

<sup>13</sup>C NMR (75 MHz, CDCl<sub>3</sub>) δ 163.4, 139.1, 136.4, 136.3, 133.5, 132.1, 130.1, 129.5, 128.8, 128.5, 128.2, 127.0, 126.7, 123.4, 121.7, 121.0, 119.6, 109.8, 101.7, 83.5, 49.9, 24.7.

<sup>11</sup>B NMR (96 MHz, CDCl<sub>3</sub>) δ 32.35.

HRMS (ESI-TOF) *m/z*: Calcd. for C<sub>31</sub>H<sub>32</sub>BNO<sub>4</sub> [M+Na]<sup>+</sup>: 516.2322, Found: 516.2324.

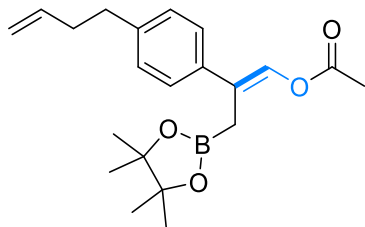

**(E)-2-(4-(But-3-en-1-yl)phenyl)-3-(4,4,5,5-tetramethyl-1,3,2-dioxaborolan-2-yl)prop-1-en-1-yl acetate (4y)**

47.0 mg, 66% yield, colorless oil. Eluent: pentane/ethyl acetate = 30/1-20/1.

**<sup>1</sup>H NMR** (300 MHz, CDCl<sub>3</sub>) δ 7.49 (t, *J* = 1.0 Hz, 1H), 7.32 (d, *J* = 8.5 Hz, 2H), 7.14 (dd, *J* = 8.0, 0.5 Hz, 2H), 5.98 – 5.77 (m, 1H), 5.12 – 4.95 (m, 2H), 2.81 – 2.67 (m, 2H), 2.44 – 2.31 (m, 2H), 2.21 (s, 3H), 2.18 (s, 2H), 1.18 (s, 12H).

**<sup>13</sup>C NMR** (75 MHz, CDCl<sub>3</sub>) δ 168.0, 140.8, 138.0, 136.9, 131.6, 128.4, 126.1, 122.9, 114.9, 83.4, 35.5, 35.0, 24.6, 20.9.

**<sup>11</sup>B NMR** (96 MHz, CDCl<sub>3</sub>) δ 32.67.

**HRMS** (ESI-TOF) *m/z*: Calcd. for C<sub>21</sub>H<sub>29</sub>BO<sub>4</sub> [M+Na]<sup>+</sup>: 379.2060, Found: 379.2061.

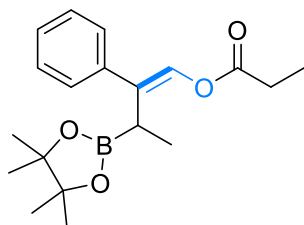

**(E)-2-Phenyl-3-(4,4,5,5-tetramethyl-1,3,2-dioxaborolan-2-yl)but-1-en-1-yl propionate (4z)**

36.3 mg, 55% yield (from *trans*-β-methylstyrene); 38.3 mg, 58% yield (from *cis*-β-methylstyrene), colorless oil. Eluent: pentane/ethyl acetate = 30/1-20/1.

**<sup>1</sup>H NMR** (300 MHz, CDCl<sub>3</sub>) δ 7.47 – 7.11 (m, 6H), 2.72 – 2.44 (m, 3H), 1.29 – 1.24 (m, 9H), 1.24 – 1.21 (m, 9H).

**<sup>13</sup>C NMR** (75 MHz, CDCl<sub>3</sub>) δ 171.3, 139.4, 132.3, 129.5, 128.2, 127.2, 126.9, 83.3, 27.6, 24.9, 24.6, 14.5, 9.0.

**<sup>11</sup>B NMR** (96 MHz, CDCl<sub>3</sub>) δ 33.64.

**HRMS** (ESI-TOF) *m/z*: Calcd. for C<sub>19</sub>H<sub>27</sub>BO<sub>4</sub> [M+Na]<sup>+</sup>: 353.1903, Found: 353.1907.

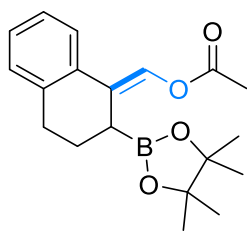

**(E)-2-(4,4,5,5-Tetramethyl-1,3,2-dioxaborolan-2-yl)-3,4-dihydronaphthalen-1(2H)-ylidene)methyl acetate (4aa)**

38.1 mg, 58% yield, colorless oil. Eluent: pentane/ethyl acetate = 30/1-20/1.

<sup>1</sup>H NMR (300 MHz, CDCl<sub>3</sub>) δ 7.71 (d, *J* = 2.0 Hz, 1H), 7.55 – 7.49 (m, 1H), 7.17 – 7.07 (m, 3H), 2.88 – 2.72 (m, 1H), 2.69 – 2.55 (m, 2H), 2.19 (s, 3H), 1.97 – 1.80 (m, 2H), 1.20 (s, 12H).

<sup>13</sup>C NMR (75 MHz, CDCl<sub>3</sub>) δ 167.8, 138.3, 132.7, 130.2, 128.5, 126.7, 126.2, 123.7, 122.7, 83.3, 30.1, 24.8, 24.5, 23.7, 20.9.

HRMS (ESI-TOF) *m/z*: Calcd. for C<sub>19</sub>H<sub>25</sub>BO<sub>4</sub> [M+Na]<sup>+</sup>: 351.1746, Found: 351.1748.

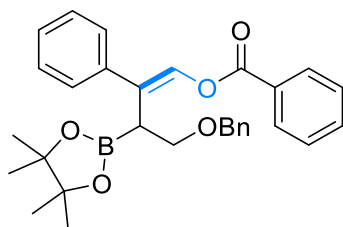

**(E)-4-(Benzyloxy)-2-phenyl-3-(4,4,5,5-tetramethyl-1,3,2-dioxaborolan-2-yl)but-1-en-1-yl benzoate (4ab)**

45.5 mg, 47% yield, colorless oil. Eluent: pentane/ethyl acetate = 20/1-15/1.

<sup>1</sup>H NMR (300 MHz, CDCl<sub>3</sub>) δ 8.25 – 8.20 (m, 2H), 7.66 (s, 1H), 7.65 – 7.59 (m, 1H), 7.59 – 7.45 (m, 4H), 7.41 – 7.20 (m, 8H), 4.58 – 4.36 (m, 2H), 4.18 – 3.88 (m, 2H), 3.05 (dd, *J* = 9.5, 6.5 Hz, 1H), 1.21 (s, 6H), 1.19 (s, 6H).

<sup>13</sup>C NMR (75 MHz, CDCl<sub>3</sub>) δ 163.2, 139.7, 138.8, 133.4, 133.1, 130.6, 130.3, 129.3, 128.9, 128.5, 128.2, 128.1, 127.7, 127.4, 127.2, 127.1, 126.5, 83.6, 72.8, 69.6, 25.1, 24.3.

<sup>11</sup>B NMR (96 MHz, CDCl<sub>3</sub>) δ 32.02.

HRMS (ESI-TOF) *m/z*: Calcd. for C<sub>30</sub>H<sub>33</sub>BO<sub>5</sub> [M+Na]<sup>+</sup>: 507.2324, Found: 507.2326.

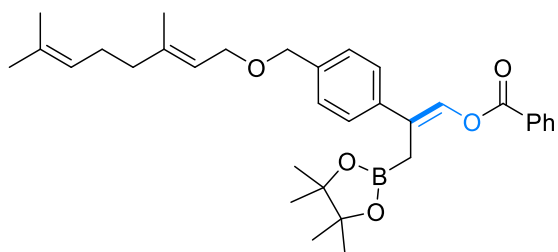

**(E)-2-(4-(((E)-3,7-Dimethylocta-2,6-dien-1-yl)oxy)methyl)phenyl)-3-(4,4,5,5-tetramethyl-1,3,2-dioxaborolan-2-yl)prop-1-en-1-yl benzoate (4ac)**

67.9 mg, 64% yield, colorless oil. Eluent: pentane/ethyl acetate = 20/1.

<sup>1</sup>H NMR (300 MHz, CDCl<sub>3</sub>) δ 8.24 – 8.16 (m, 2H), 7.75 (s, 1H), 7.65 – 7.57 (m, 1H), 7.54 – 7.39 (m, 4H), 7.31 (d, *J* = 8.5 Hz, 2H), 5.41 (td, *J* = 7.0, 1.5 Hz, 1H), 5.13 – 5.03 (m, 1H), 4.50 (s, 2H), 4.00 (dd, *J* = 7.0, 1.0 Hz, 2H), 2.29 (s, 2H), 2.07 (d, *J* = 3.0 Hz, 4H), 1.76 (q, *J* = 1.0 Hz, 3H), 1.68 (s, 3H), 1.62 – 1.57 (m, 3H), 1.16 (s, 12H).

<sup>13</sup>C NMR (75 MHz, CDCl<sub>3</sub>) δ 163.4, 140.6, 138.7, 137.6, 133.4, 131.9, 130.1, 129.5, 128.5, 127.9, 126.2, 123.9, 123.5, 121.9, 83.5, 71.8, 66.3, 32.3, 26.7, 25.7, 25.0, 24.6, 23.5, 17.7.

<sup>11</sup>B NMR (96 MHz, CDCl<sub>3</sub>) δ 30.15.

HRMS (ESI-TOF) *m/z*: Calcd. for C<sub>33</sub>H<sub>43</sub>BO<sub>5</sub> [M+Na]<sup>+</sup>: 553.3106, Found: 553.3110.

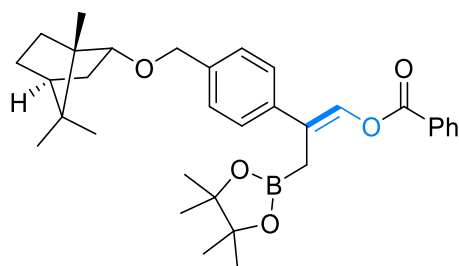

**(E)-3-(4,4,5,5-Tetramethyl-1,3,2-dioxaborolan-2-yl)-2-(4-(((1S,2S,4S)-1,7,7-trimethylbicyclo[2.2.1]heptan-2-yl)oxy)methyl)phenyl)prop-1-en-1-yl benzoate (4ad)**

62.6 mg, 59% yield, colorless oil. Eluent: pentane/ethyl acetate = 20/1.

<sup>1</sup>H NMR (300 MHz, CDCl<sub>3</sub>) δ 8.25 – 8.14 (m, 3H), 7.76 (s, 1H), 7.70 – 7.56 (m, 2H), 7.53 – 7.40 (m, 3H), 7.34 – 7.29 (m, 1H), 4.66 – 4.38 (m, 2H), 3.76 – 3.65 (m, 1H), 2.30 (s, 2H), δ 2.19 – 2.04 (m, 2H), 1.78 – 1.62 (m, 2H), 1.39 – 1.23 (m, 3H), 1.16 (s, 12H), 0.91 (s, 3H), 0.84 (d, *J* = 8.0 Hz, 6H).

<sup>13</sup>C NMR (75 MHz, CDCl<sub>3</sub>) δ 163.4, 138.5, 134.5, 133.4, 131.8, 130.6, 130.1, 129.5, 128.9, 128.5, 127.3, 126.1, 123.6, 84.2, 83.5, 71.3, 49.3, 47.9, 45.1, 36.1, 28.3, 26.8, 24.7, 19.8, 18.9, 14.0.

<sup>11</sup>B NMR (96 MHz, CDCl<sub>3</sub>) δ 32.42.

HRMS (ESI-TOF) *m/z*: Calcd. for C<sub>33</sub>H<sub>43</sub>BO<sub>5</sub> [M+Na]<sup>+</sup>: 553.3106, Found: 553.3101.

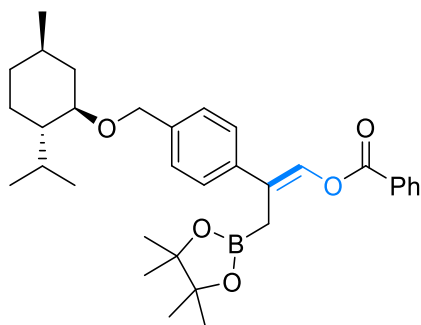

**(E)-2-(4-(((1R,2S,5R)-2-Isopropyl-5-methylcyclohexyl)oxy)methyl)phenyl-3-(4,4,5,5-tetramethyl-1,3,2-dioxaborolan-2-yl)prop-1-en-1-yl benzoate (4ae)**

54.3 mg, 51% yield, colorless oil. Eluent: pentane/ethyl acetate = 20/1.

<sup>1</sup>H NMR (300 MHz, CDCl<sub>3</sub>) δ 8.26 – 8.15 (m, 2H), 7.76 (s, 1H), 7.65 – 7.57 (m, 1H), 7.52 – 7.40 (m, 4H), 7.36 – 7.30 (m, 2H), 4.53 (dd, *J* = 75.0, 11.5 Hz, 2H), 3.17 (td, *J* = 10.5, 4.0 Hz, 1H), 2.38 – 2.11 (m, 4H), 1.77 – 1.57 (m, 2H), 1.45 – 1.24 (m, 3H), 1.16 (s, 12H), 0.93 (dd, *J* = 10.5, 7.0 Hz, 9H), 0.73 (d, *J* = 7.0 Hz, 3H).

<sup>13</sup>C NMR (75 MHz, CDCl<sub>3</sub>) δ 163.4, 138.6, 138.1, 133.4, 131.9, 130.1, 129.5, 128.9, 128.5, 127.9, 126.1, 123.6, 83.5, 78.7, 70.1, 48.4, 40.4, 34.6, 31.6, 25.6, 24.7, 23.3, 22.4, 21.1, 16.1.

<sup>11</sup>B NMR (96 MHz, CDCl<sub>3</sub>) δ 32.31.

HRMS (ESI-TOF) *m/z*: Calcd. for C<sub>33</sub>H<sub>45</sub>BO<sub>5</sub> [M+Na]<sup>+</sup>: 555.3263, Found: 555.3269.

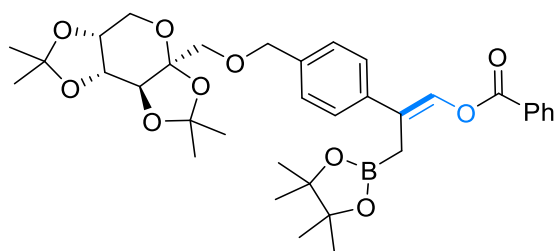

**(E)-3-(4,4,5,5-Tetramethyl-1,3,2-dioxaborolan-2-yl)-2-(4-(((3aS,5aR,8aR,8bS)-2,2,7,7-tetramethyltetrahydro-3aH-bis([1,3]dioxolo)[4,5-b:4',5'-d]pyran-3a-yl)methoxy)methyl)phenyl)prop-1-en-1-yl benzoate (4af)**

86.6 mg, 68% yield, colorless oil. Eluent: pentane/ethyl acetate = 20/1-5/1.

<sup>1</sup>H NMR (300 MHz, CDCl<sub>3</sub>) δ 8.19 (dd, *J* = 8.5, 1.5 Hz, 2H), 7.74 (s, 1H), 7.64 – 7.55 (m, 1H), 7.52 – 7.40 (m, 4H), 7.31 (d, *J* = 8.5 Hz, 2H), 4.71 – 4.54 (m, 3H), 4.44 (d, *J* = 2.5 Hz, 1H), 4.25 – 4.18 (m, 1H), 3.92 (dd, *J* = 13.0, 2.0 Hz, 1H), 3.73 (dd, *J* = 13.0, 1.0 Hz, 1H), 3.67 – 3.55 (m, 2H), 2.29 (s, 2H), 1.58 – 1.51 (m, 3H), 1.42 (s, 6H), 1.33 (s, 3H), 1.14 (s, 12H).

<sup>13</sup>C NMR (75 MHz, CDCl<sub>3</sub>) δ 163.4, 138.8, 137.0, 133.4, 131.9, 130.1, 129.5, 128.5, 127.7, 126.1, 123.5, 108.9, 108.6, 102.8, 83.5, 73.5, 71.6, 71.1, 70.2, 70.1, 61.0, 26.6, 25.9, 25.5, 25.0, 24.6, 24.1.

$^{11}\text{B}$  NMR (96 MHz,  $\text{CDCl}_3$ )  $\delta$  33.17.

HRMS (ESI-TOF)  $m/z$ : Calcd. for  $\text{C}_{35}\text{H}_{45}\text{BO}_{10}$   $[\text{M}+\text{Na}]^+$ : 659.3009, Found: 659.3009.

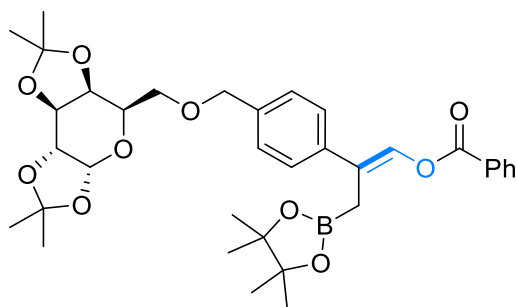

**(E)-3-(4,4,5,5-Tetramethyl-1,3,2-dioxaborolan-2-yl)-2-(4-(((3aR,5R,5aS,8aS,8bR)-2,2,7,7-tetramethyltetrahydro-5H-bis([1,3]dioxolo)[4,5-b:4',5'-d]pyran-5-yl)methoxy)methyl)phenyl)prop-1-en-1-yl benzoate (4ag)**

91.7 mg, 72% yield, colorless oil. Eluent: pentane/ethyl acetate = 20/1-5/1.

$^1\text{H}$  NMR (300 MHz,  $\text{CDCl}_3$ )  $\delta$  8.31 – 8.13 (m, 2H), 7.74 (s, 1H), 7.65 – 7.54 (m, 1H), 7.52 – 7.40 (m, 4H), 7.32 (d,  $J = 8.5$  Hz, 2H), 5.55 (d,  $J = 5.0$  Hz, 1H), 4.70 – 4.50 (m, 3H), 4.38 – 4.24 (m, 2H), 4.01 (td,  $J = 6.0, 1.5$  Hz, 1H), 3.77 – 3.57 (m, 2H), 2.29 (s, 2H), 1.54 (s, 3H), 1.44 (s, 3H), 1.34 (d,  $J = 2.5$  Hz, 6H), 1.15 (s, 12H).

$^{13}\text{C}$  NMR (75 MHz,  $\text{CDCl}_3$ )  $\delta$  163.4, 138.8, 137.3, 133.4, 131.9, 130.1, 129.5, 128.5, 127.8, 126.2, 123.5, 109.2, 108.6, 96.4, 83.5, 73.0, 71.2, 70.7, 70.6, 68.8, 66.9, 26.1, 26.0, 25.0, 24.6, 24.5.

$^{11}\text{B}$  NMR (96 MHz,  $\text{CDCl}_3$ )  $\delta$  32.34.

HRMS (ESI-TOF)  $m/z$ : Calcd. for  $\text{C}_{35}\text{H}_{45}\text{BO}_{10}$   $[\text{M}+\text{Na}]^+$ : 659.3009, Found: 659.3019.

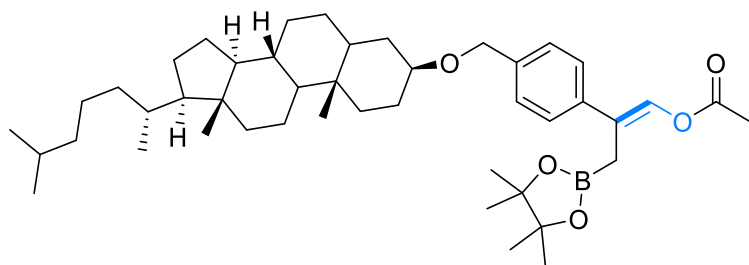

**(E)-2-(4-(((3S,8R,10S,13R,14S,17R)-10,13-Dimethyl-17-((R)-6-methylheptan-2-yl)hexadecahydro-1H-cyclopenta[a]phenanthren-3-yl)oxy)methyl)phenyl)-3-(4,4,5,5-tetramethyl-1,3,2-dioxaborolan-2-yl)prop-1-en-1-yl acetate (4ah)**

82.9 mg, 59% yield, colorless oil. Eluent: pentane/ethyl acetate = 20/1.

**<sup>1</sup>H NMR** (300 MHz, CDCl<sub>3</sub>) δ 7.49 (s, 1H), 7.39 – 7.29 (m, 2H), 7.29 – 7.24 (m, 2H), 4.52 (s, 2H), 3.36 – 3.21 (m, 1H), 2.48 (q, *J* = 7.5 Hz, 2H), 2.15 (s, 2H), 1.98 – 1.68 (m, 6H), 1.63 – 1.41 (m, 8H), 1.26 (s, 17H), 1.16 (s, 12H), 0.92 – 0.83 (m, 12H), 0.80 (s, 3H), 0.64 (s, 3H).

**<sup>13</sup>C NMR** (75 MHz, CDCl<sub>3</sub>) δ 171.4, 138.5, 138.1, 131.8, 127.6, 126.1, 122.7, 83.5, 83.4, 77.8, 69.4, 56.5, 56.3, 54.5, 44.9, 42.6, 40.1, 39.5, 37.0, 36.2, 35.8, 35.5, 34.9, 32.1, 28.9, 28.3, 28.0, 27.6, 25.0, 24.6, 24.2, 23.8, 22.8, 22.6, 21.2, 18.7, 12.3, 12.1, 9.0.

**<sup>11</sup>B NMR** (96 MHz, CDCl<sub>3</sub>) δ 30.83.

**HRMS** (ESI-TOF) *m/z*: Calcd. for C<sub>46</sub>H<sub>73</sub>BO<sub>5</sub> [M+Na]<sup>+</sup>: 739.5456, Found: 739.5459.

#### 4. Procedure for the synthesis of **6a** & **6b**.

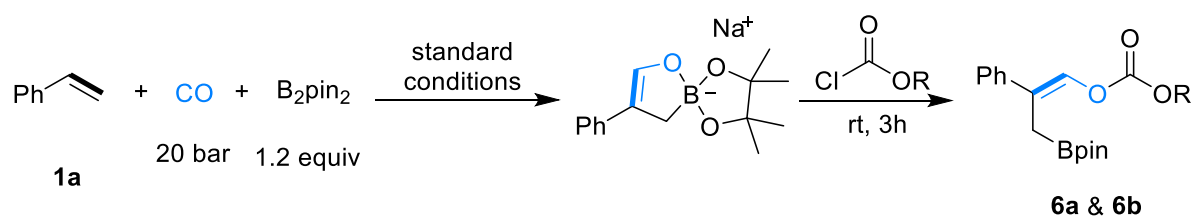

A vial (4 mL) was charged with CuCl (1.98 mg, 10.0 mol%), Xantphos (11.6 mg, 10.0 mol%), NaO<sup>t</sup>Bu (48.1 mg, 2.5 equiv), B<sub>2</sub>pin<sub>2</sub> (60.1 mg, 1.2 equiv), and a stirring bar. The vial was closed by PTFE/white rubber septum (Wheaton 13 mm Septa) and phenolic cap and connected with atmosphere with a needle. The vial was evacuated under vacuum and recharged with argon for three times. Then, toluene (1.0 mL) was injected under argon by using a syringe. After that, styrene **1a** (0.2 mmol, 1.0 equiv) was added, the vial (or several vials) was placed in an alloy plate, which was transferred into a 300 mL autoclave of the 4560 series from Parr Instruments. After flushing the autoclave three times with CO, a pressure of 20 bar of CO was adjusted at ambient temperature. Then, the reaction was performed for 24 hours at 100 °C. After 24 hours, the autoclave was cooled down with ice water to room temperature and the pressure was released carefully. Then, chloroformates (0.4 mmol, 2.0 equiv) was added to the vials by using a micro syringe, the reaction was stirred for 3 more hours at room temperature. After that, the solution was then filtered through celite and concentrated in vacuo. The residue was purified by column chromatography to afford the corresponding products **6a-6b**.



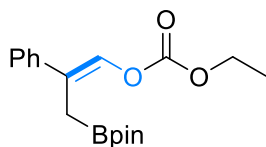

**(E)-Ethyl (2-phenyl-3-(4,4,5,5-tetramethyl-1,3,2-dioxaborolan-2-yl)prop-1-en-1-yl) carbonate (6a)**

47.2 mg, 71% yield, colorless oil. Eluent: pentane/ethyl acetate = 30/1-20/1.

$^1\text{H NMR}$  (300 MHz,  $\text{CDCl}_3$ )  $\delta$  7.39 – 7.08 (m, 6H), 4.21 (q,  $J = 7.0$  Hz, 2H), 2.17 – 2.03 (m, 2H), 1.28 (t,  $J = 7.0$  Hz, 3H), 1.08 (s, 12H).

$^{13}\text{C NMR}$  (75 MHz,  $\text{CDCl}_3$ )  $\delta$  152.9, 139.2, 133.3, 128.3, 127.1, 126.2, 123.0, 83.4, 64.5, 24.6, 14.3.

$^{11}\text{B NMR}$  (96 MHz,  $\text{CDCl}_3$ )  $\delta$  32.72.

**HRMS** (ESI-TOF)  $m/z$ : Calcd. for  $\text{C}_{28}\text{H}_{25}\text{BO}_5$  [ $\text{M}+\text{Na}$ ] $^+$ : 355.1696, Found: 355.1694.

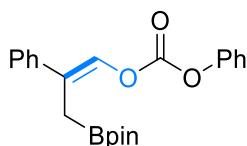

**(E)-Phenyl (2-phenyl-3-(4,4,5,5-tetramethyl-1,3,2-dioxaborolan-2-yl)prop-1-en-1-yl) carbonate (6b)**

45.6 mg, 60% yield, colorless oil. Eluent: pentane/ethyl acetate = 30/1-20/1.

$^1\text{H NMR}$  (300 MHz,  $\text{CDCl}_3$ )  $\delta$  7.48 – 7.40 (m, 4H), 7.38 – 7.23 (m, 7H), 2.26 (s, 2H), 1.22 (s, 12H).

$^{13}\text{C NMR}$  (75 MHz,  $\text{CDCl}_3$ )  $\delta$  151.4, 151.0, 138.9, 133.2, 129.6, 128.4, 127.4, 126.3, 126.2, 124.2, 121.0, 83.6, 24.6.

$^{11}\text{B NMR}$  (96 MHz,  $\text{CDCl}_3$ )  $\delta$  32.59.

**HRMS** (ESI-TOF)  $m/z$ : Calcd. for  $\text{C}_{22}\text{H}_{25}\text{BO}_5$  [ $\text{M}+\text{Na}$ ] $^+$ : 403.2473, Found: 403.2476.

## 5. Procedure for the synthesis of 7.

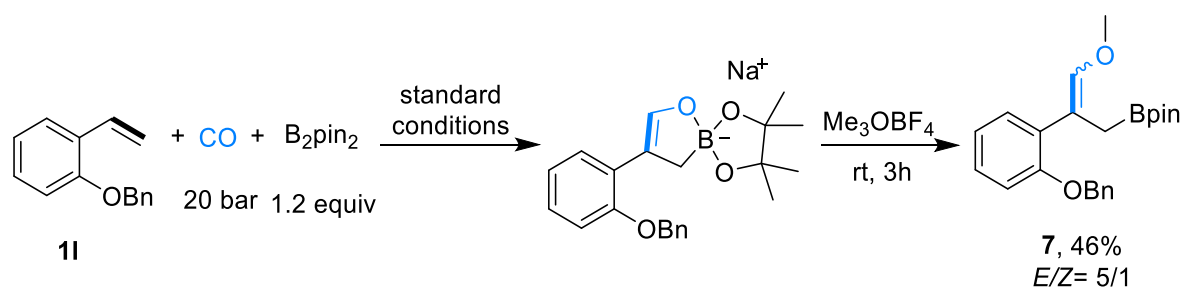

A vial (4 mL) was charged with CuCl (1.98 mg, 10.0 mol%), Xantphos (11.6 mg, 10.0 mol%), NaO<sup>t</sup>Bu (48.1 mg, 2.5 equiv), B<sub>2</sub>pin<sub>2</sub> (60.1 mg, 1.2 equiv), and a stirring bar. The vial was closed by PTFE/white rubber septum (Wheaton 13 mm Septa) and phenolic cap and connected with atmosphere with a needle. The vial was evacuated under vacuum and recharged with argon for three times. Then, toluene (1.0 mL) was injected under argon by using a syringe. After that, styrene **11** (0.2 mmol, 1.0 equiv) was added, the vial was placed in an alloy plate, which was transferred into a 300 mL autoclave of the 4560 series from Parr Instruments. After flushing the autoclave three times with CO, a pressure of 20 bar of CO was adjusted at ambient temperature. Then, the reaction was performed for 24 hours at 100 °C. After 24 hours, the autoclave was cooled down with ice water to room temperature and the pressure was released carefully. Then, trimethyloxonium tetrafluoroborate (0.3 mmol, 1.5 equiv) was added to the vials by using a micro syringe, the reaction was stirred for 3 more hours at room temperature. After that, the solution was then filtered through celite and concentrated in vacuo. The residue was purified by column chromatography (eluent: pentane/ethyl acetate = 30/1-20/1) to afford the corresponding products **7** as a colorless oil (34.9 mg, 46% yield, E/Z= 5/1). <sup>1</sup>H NMR (300 MHz, CDCl<sub>3</sub>) δ 7.50 – 7.42 (m, 2H), 7.41 – 7.32 (m, 4H), 7.22 – 7.16 (m, 1H), 6.92 – 6.83 (m, 2H), 6.30 (s, 1H), 5.09 (s, 2H), 3.62 (s, 3H), 2.15 – 2.00 (m, 2H), 1.15 (s, 12H). <sup>13</sup>C NMR (75 MHz, CDCl<sub>3</sub>) δ 156.5, 145.9, 130.8, 130.1, 128.4, 127.6, 127.3, 127.2, 120.8, 113.7, 112.7, 82.9, 70.4, 59.4, 24.7. <sup>11</sup>B NMR (96 MHz, CDCl<sub>3</sub>) δ 33.36. HRMS (ESI-TOF) m/z: Calcd. for C<sub>22</sub>H<sub>25</sub>BO<sub>5</sub> [M+Na]<sup>+</sup>: 403.2060, Found: 403.2056.

## 6. Procedure for the synthesis of 5.

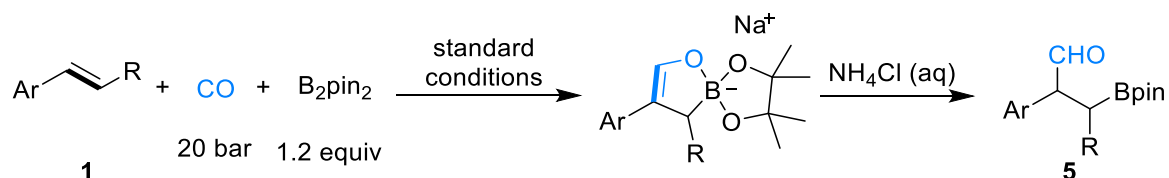

A vial (4 mL) was charged with CuCl (1.98 mg, 10.0 mol%), Xantphos (11.6 mg, 10.0 mol%), NaO<sup>t</sup>Bu (48.1 mg, 2.5 equiv), B<sub>2</sub>pin<sub>2</sub> (60.1 mg, 1.2 equiv), and a stirring bar. The vial was closed by PTFE/white rubber septum (Wheaton 13 mm Septa) and phenolic cap and connected with atmosphere with a needle. The vial was evacuated under vacuum and recharged with argon for three times. Then, toluene (1.0 mL) was injected under argon by using a syringe. After that, styrene **1** (0.2 mmol, 1.0 equiv) was added, the vial (or several vials) was placed in an alloy plate, which was transferred into a 300 mL autoclave of the 4560 series from Parr Instruments. After flushing the autoclave three times with CO, a pressure of 20 bar of CO was adjusted at ambient temperature. Then, the reaction was performed for 24 hours at 100 °C. After 24 hours, the autoclave was cooled down with ice water to room temperature and the pressure was released carefully. The reaction was quenched with 0.5 mL saturated aqueous NH<sub>4</sub>Cl solution [saturated deuterium water (D<sub>2</sub>O) solution of NH<sub>4</sub>Cl] and stirred for 5 minutes at room temperature. After that, the solution was extracted with EA (5 mL×3). The organic layer concentrated in vacuo and the residue was purified by column chromatography (eluent: pentane/ethyl acetate = 30/1-20/1) to afford the corresponding products **5b**, **5c**, and **5d**.

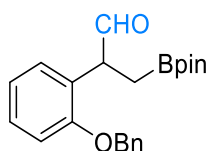

### 2-(2-(Benzyloxy)phenyl)-3-(4,4,5,5-tetramethyl-1,3,2-dioxaborolan-2-yl)propanal (**5b**)

46.9 mg, 64% yield, colorless oil. Eluent: pentane/ethyl acetate = 30/1-20/1.

<sup>1</sup>H NMR (300 MHz, CDCl<sub>3</sub>) δ 9.62 (s, 1H), 7.32 – 7.05 (m, 7H), 6.91 – 6.83 (m, 2H), 5.04 (s, 2H), 4.03 (dd, *J* = 8.5, 7.0 Hz, 1H), 1.42 (dd, *J* = 16.0, 8.5 Hz, 1H), 1.13 (s, 6H), 1.11 (s, 6H), 1.09 – 1.02 (m, 1H).

<sup>13</sup>C NMR (75 MHz, CDCl<sub>3</sub>) δ 201.8, 156.3, 136.9, 130.0, 128.6, 127.8, 127.0, 121.2, 112.2, 83.2, 70.1, 49.7, 24.7, 24.7.

<sup>11</sup>B NMR (96 MHz, CDCl<sub>3</sub>) δ 33.04.

HRMS (ESI-TOF) *m/z*: Calcd. for C<sub>22</sub>H<sub>27</sub>BO<sub>4</sub> [M+Na]<sup>+</sup>: 389.1904, Found: 389.1898.

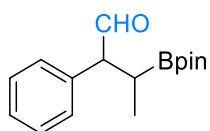

**2-Phenyl-3-(4,4,5,5-tetramethyl-1,3,2-dioxaborolan-2-yl)butanal (5c)**

26.9 mg, 49% yield, 1/1 *dr*, colorless oil. Eluent: pentane/ethyl acetate = 30/1-20/1.

**<sup>1</sup>H NMR** (400 MHz, CDCl<sub>3</sub>) δ 9.83 – 9.46 (m, 1H), 7.42 – 7.22 (m, 4H), 7.20 – 7.14 (m, 12H), 3.62 (d, *J* = 10.5 Hz, 1H), 1.88 – 1.46 (m, 1H), 1.29 (d, *J* = 19.5 Hz, 6H), 1.06 (s, 6H), 1.05 – 0.80 (m, 3H).

**<sup>13</sup>C NMR** (101 MHz, CDCl<sub>3</sub>) δ 201.3, 201.2, 136.7, 136.1, 129.4, 129.4, 129.0, 128.7, 127.5, 127.4, 83.3, 83.2, 62.9, 61.4, 24.7, 24.5, 24.4, 13.2, 12.7.

**<sup>11</sup>B NMR** (128 MHz, CDCl<sub>3</sub>) δ 33.21.

**HRMS** (ESI-TOF) *m/z*: Calcd. for C<sub>16</sub>H<sub>23</sub>BO<sub>3</sub> [M+Na]<sup>+</sup>: 297.1640, Found: 297.1647.

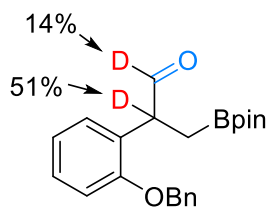

**(5d)**

47.7 mg, 61% yield, colorless oil. Eluent: pentane/ethyl acetate = 30/1-20/1.

**<sup>13</sup>C NMR** (75 MHz, CDCl<sub>3</sub>) δ 201.9, 201.9, 156.2, 136.9, 130.0, 129.9, 128.6, 127.8, 127.0, 121.2, 112.2, 83.2, 70.1, 49.7, 24.7, 24.7.

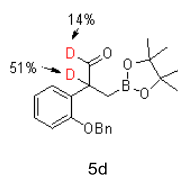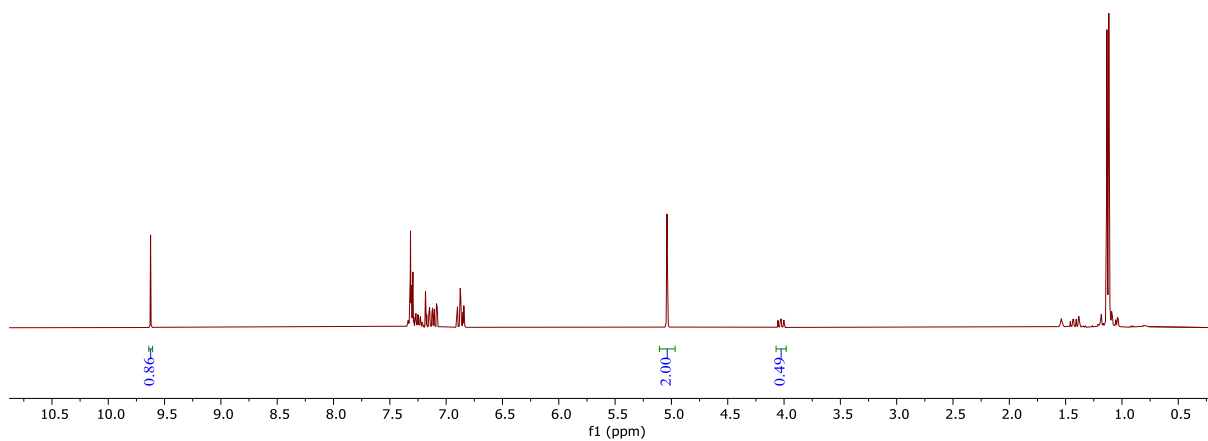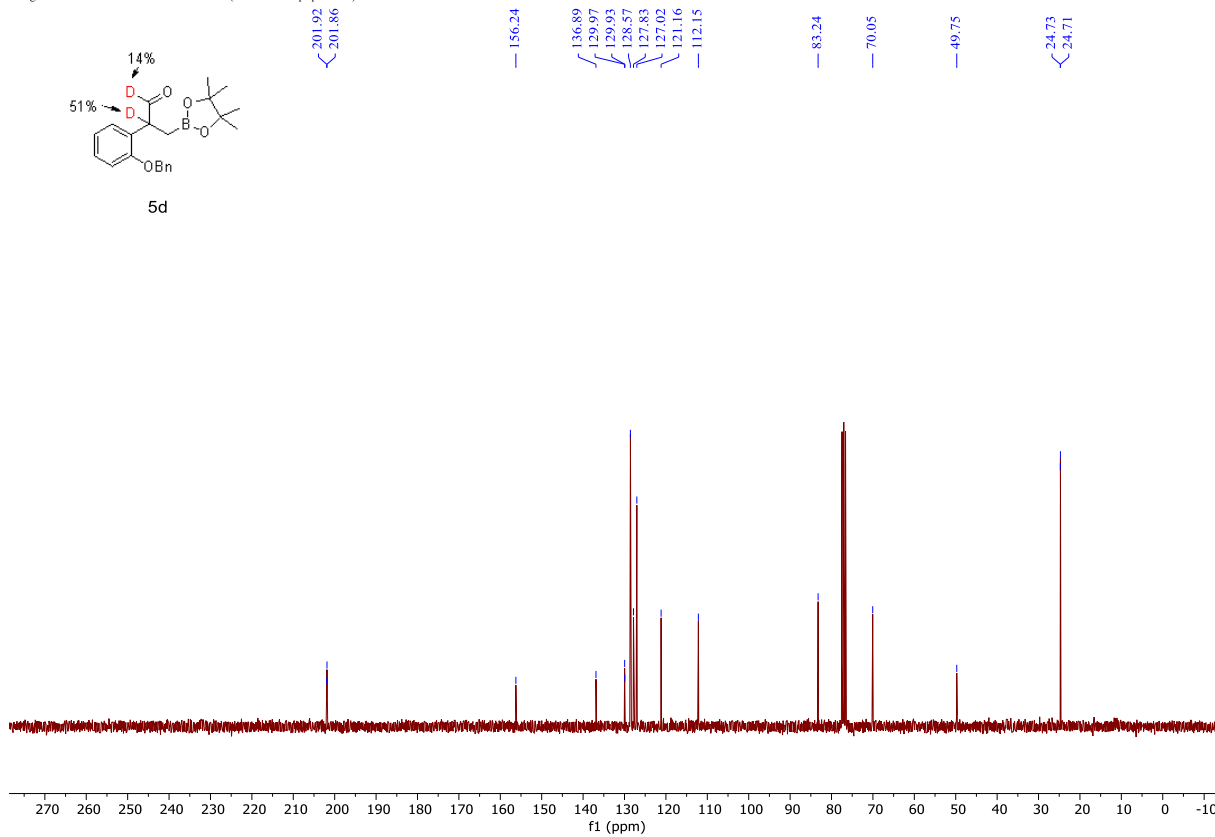

## 7. Analysis of the $^{11}\text{B}$ NMR spectroscopies after reaction<sup>[1]</sup>

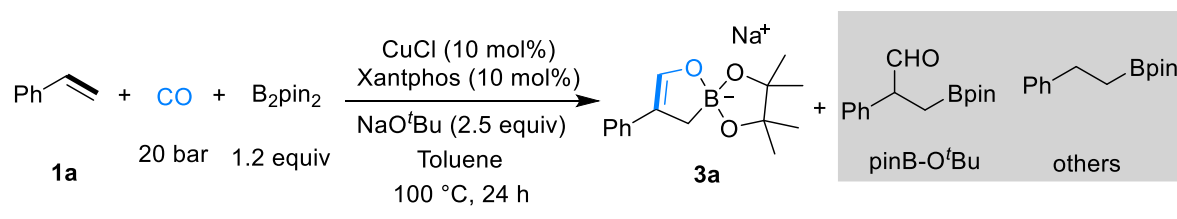

A vial (4 mL) was charged with CuCl (1.98 mg, 10.0 mol%), Xantphos (11.6 mg, 10.0 mol%), NaO<sup>t</sup>Bu (48.1 mg, 2.5 equiv), B<sub>2</sub>pin<sub>2</sub> (60.1 mg, 1.2 equiv), and a stirring bar. The vial was closed by PTFE/white rubber septum (Wheaton 13 mm Septa) and phenolic cap and connected with atmosphere with a needle. The vial was evacuated under vacuum and recharged with argon for three times. Then, toluene (1.0 mL) was injected under argon by using a syringe. After that, styrene **1a** (0.2 mmol, 1.0 equiv) was added, the vial was placed in an alloy plate, which was transferred into a 300 mL autoclave of the 4560 series from Parr Instruments. After flushing the autoclave three times with CO, a pressure of 20 bar of CO was adjusted at ambient temperature. Then, the reaction was performed for 24 hours at 100 °C. After 24 hours, the autoclave was cooled down with ice water to room temperature and the pressure was released carefully. After that, remove the solvent (toluene) and add DMSO-*d*<sub>6</sub> as deuterium solvent. Then, the mixture was transferred to an NMR tube and the raw  $^{11}\text{B}$  NMR spectra was measured immediately (**Figure 1a**). For the  $^{11}\text{B}$  NMR spectra of **3a**, wash the residue with pentane (5 mL) two times after removed the solvent (toluene) and then, measured the  $^{11}\text{B}$  NMR spectra in DMSO-*d*<sub>6</sub> (**Figure 1b**).

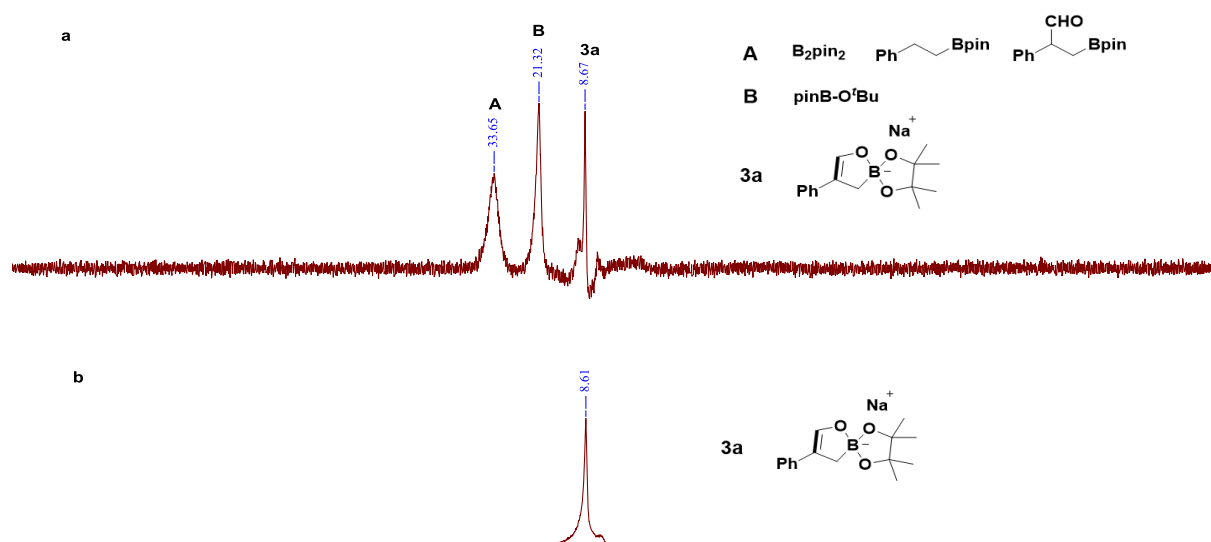

**Figure 1.**  $^{11}\text{B}$  NMR spectroscopies (96.3 HZ, DMSO-*d*<sub>6</sub>)

## 8. References.

- [1] a) M. V. Joannou, B. S. Moyer, S. J. Meek, *J. Am. Chem. Soc.* **2015**, *137*, 6176-6179; b) B. Lee, P. J. Chirik, *J. Am. Chem. Soc.* **2020**, *142*, 2429-2437; c) C. Kim, B. Roh, H. G. Lee, *Chem. Sci.* **2021**, *12*, 3668-3673; d) L. Zhang, J. Cheng, B. Carry, Z. Hou, *J. Am. Chem. Soc.* **2012**, *134*, 14314-14317; e) B. Carry, L. Zhang, M. Nishiura, Z. Hou, *Angew. Chem. Int. Ed.* **2016**, *55*, 6257-6260; f) Z. Li, L. Zhang, M. Nishiura, G. Luo, Y. Luo, Z. Hou, *J. Am. Chem. Soc.* **2020**, *142*, 1966-1974.

## 9. NMR Spectra

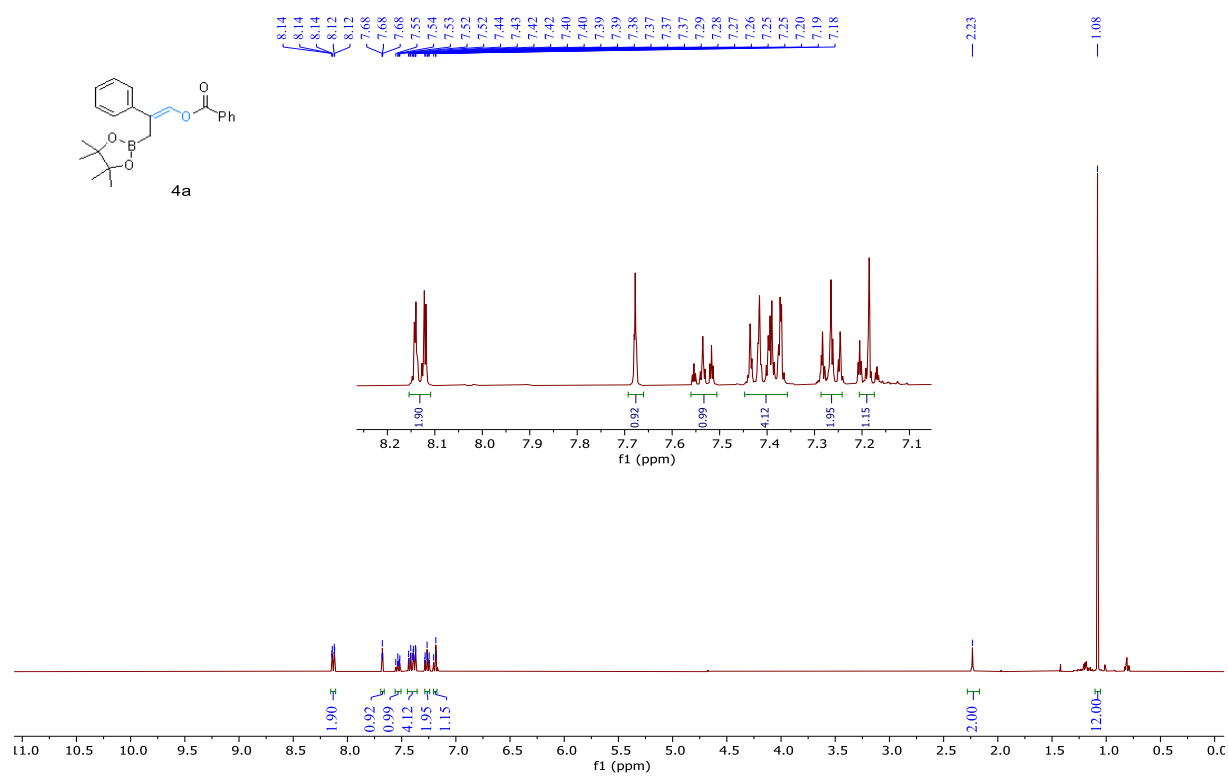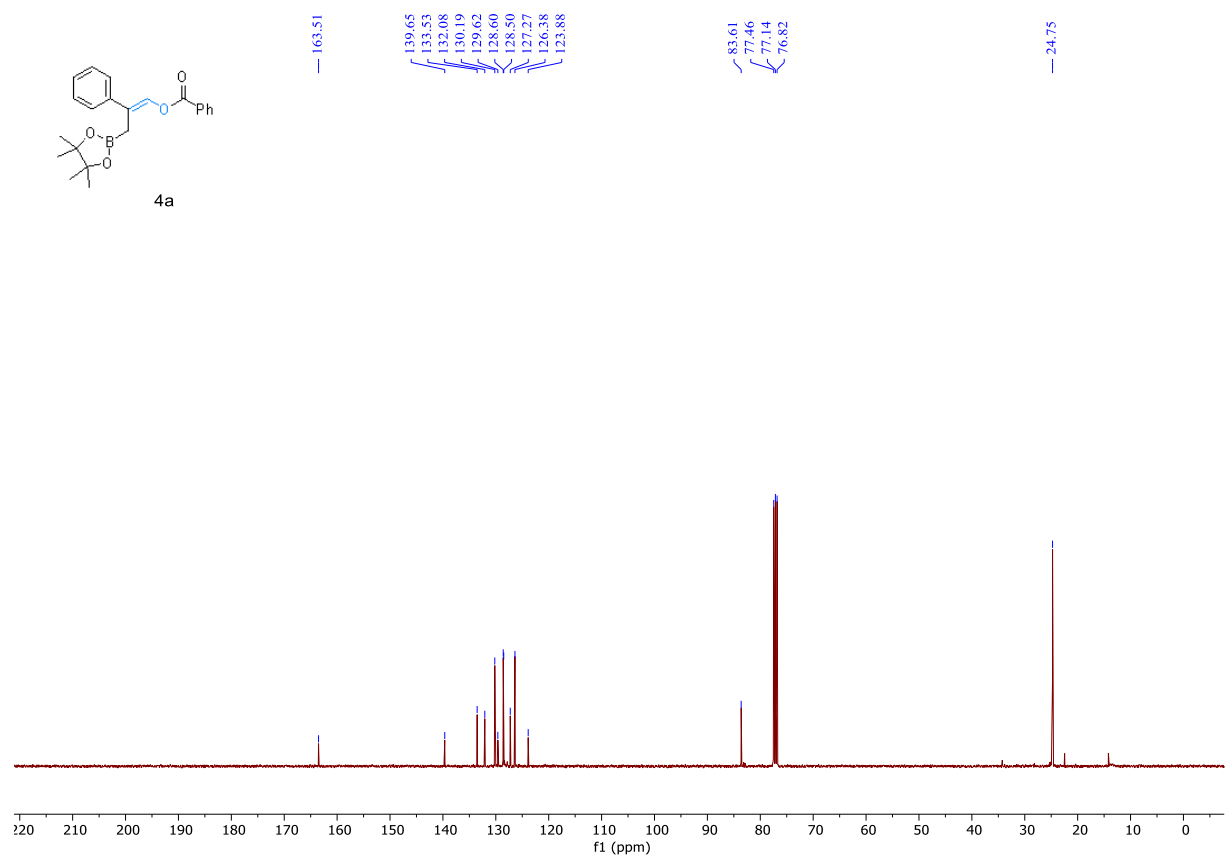



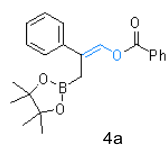

— 32.85

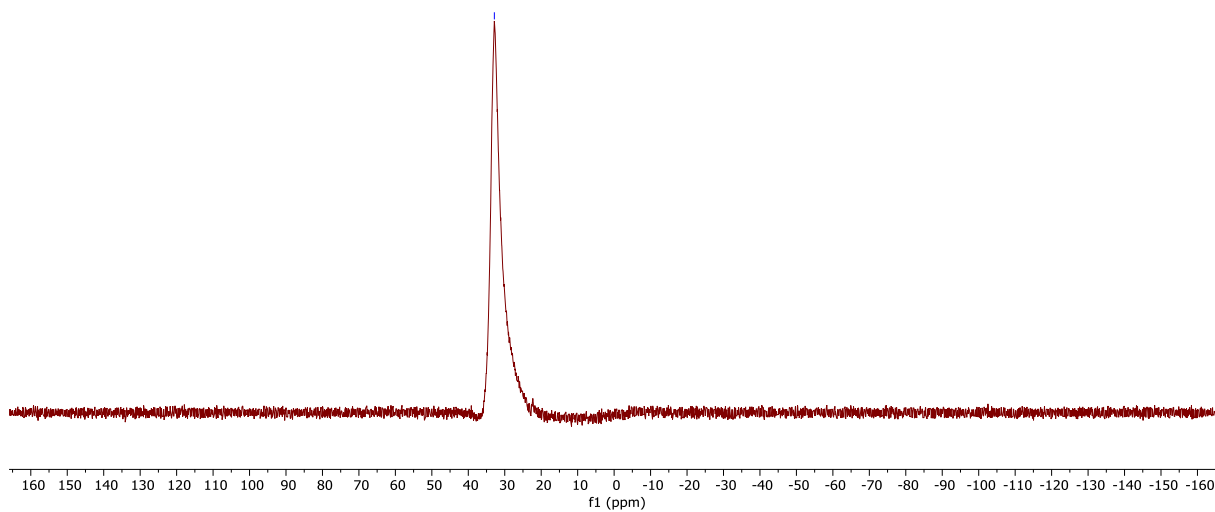

Yang Yuan YY-W-119 — Au1H CDC13 [C:\Bruker\TopSpin3.6.2] 2106 2 — 300.13 MHz

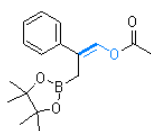

4b

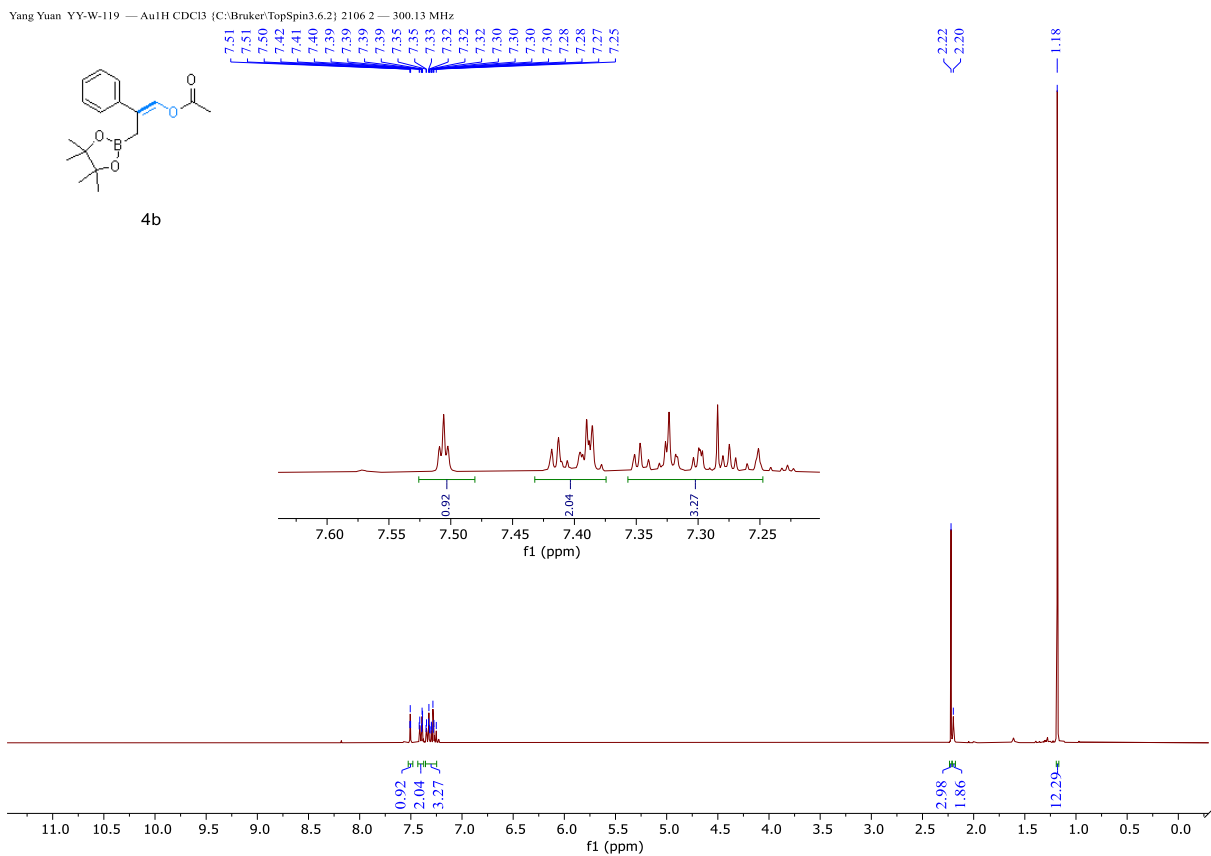

Yang Yuan YY-W-119 — Au13C CDC13 [C:\Bruker\TopSpin3.6.2] 2106 2 — 75.48 MHz



4b

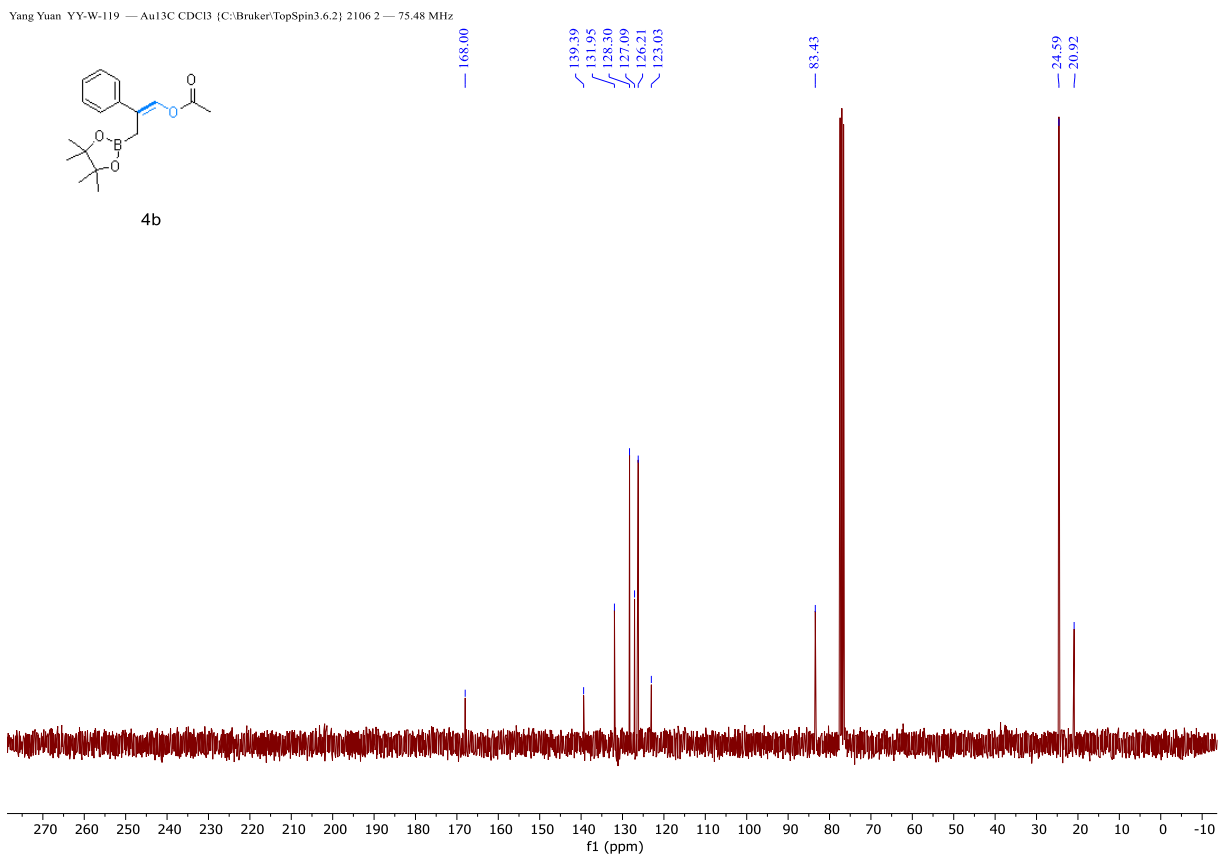

Yang Yuan YY-W-96 — Au1H CDC13 (C:\Bruker\TopSpin3.5\pl6) 2106 2 — 400.13 MHz

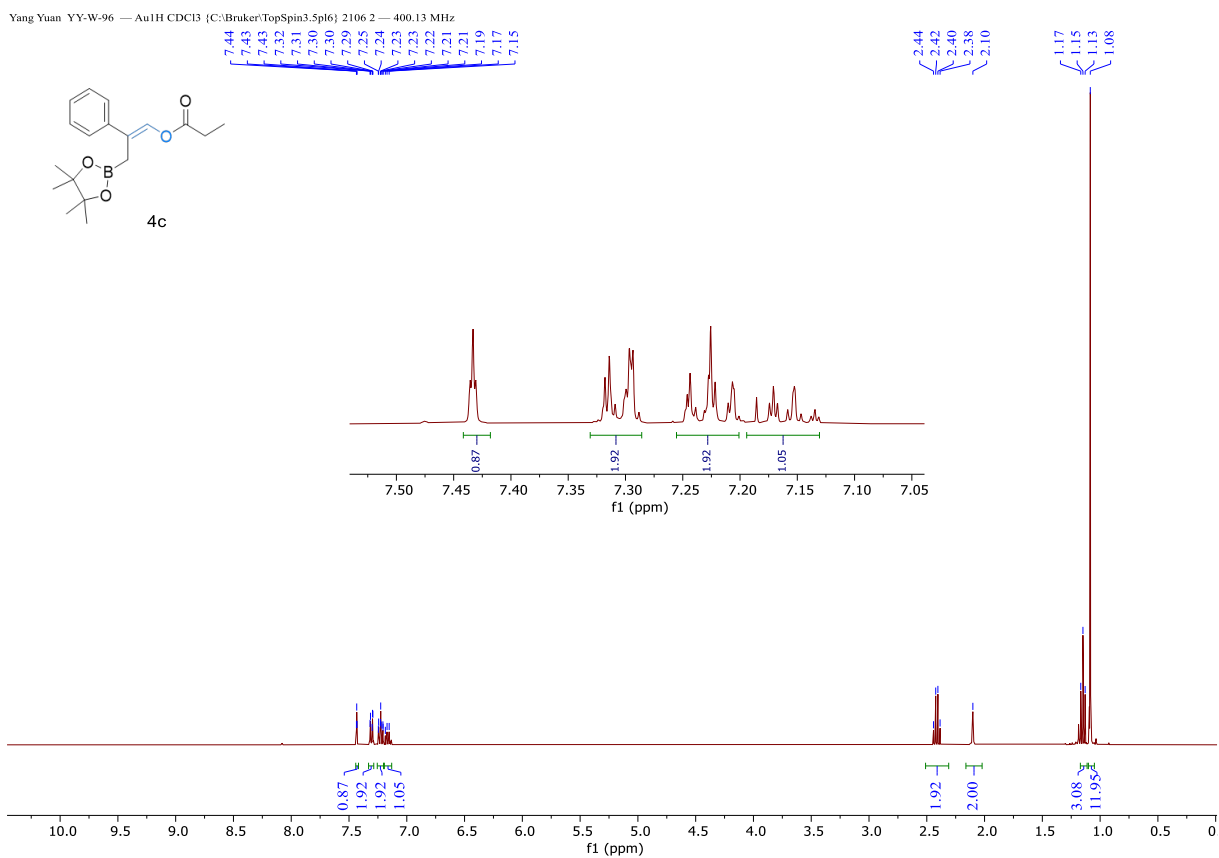

Yang Yuan YY-W-96 — Au13C CDC13 (C:\Bruker\TopSpin3.5\pl6) 2106 2 — 100.63 MHz

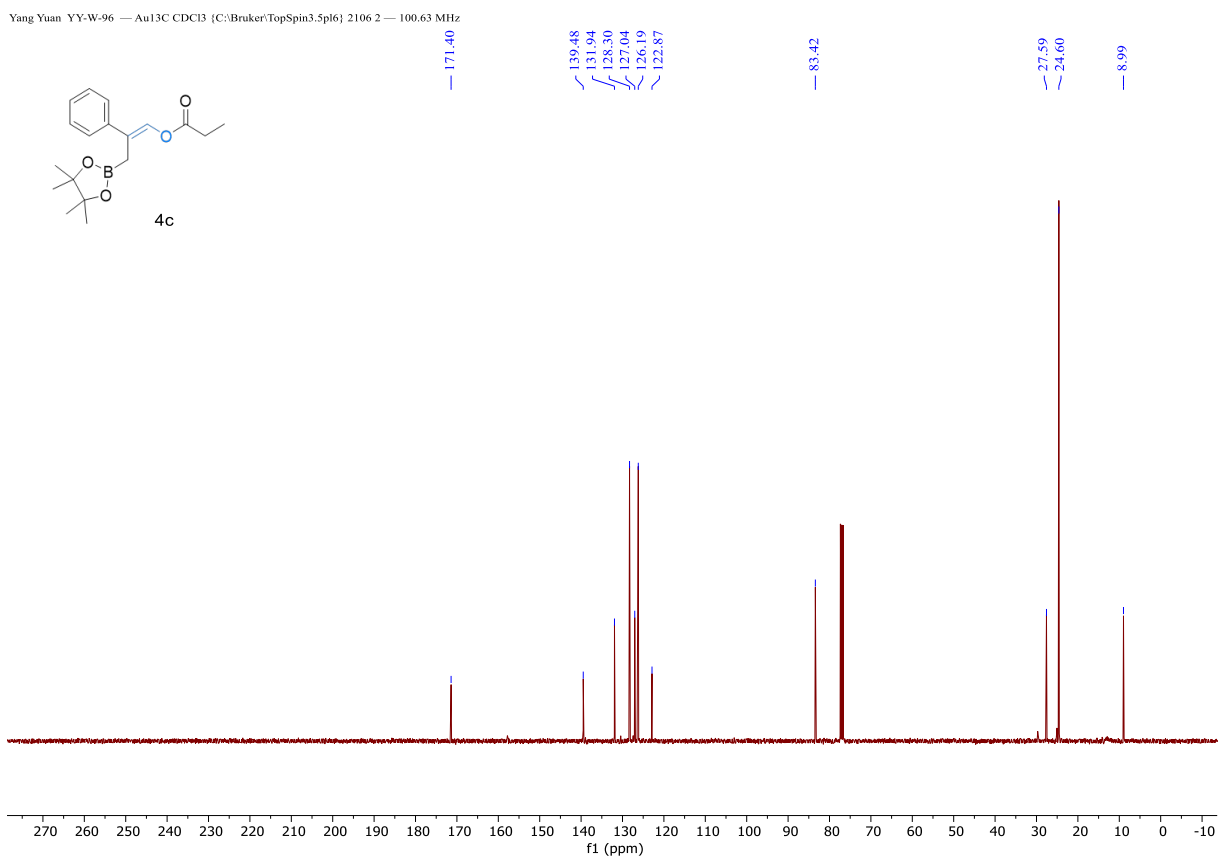

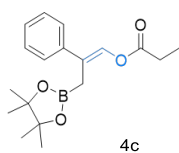

— 33.02

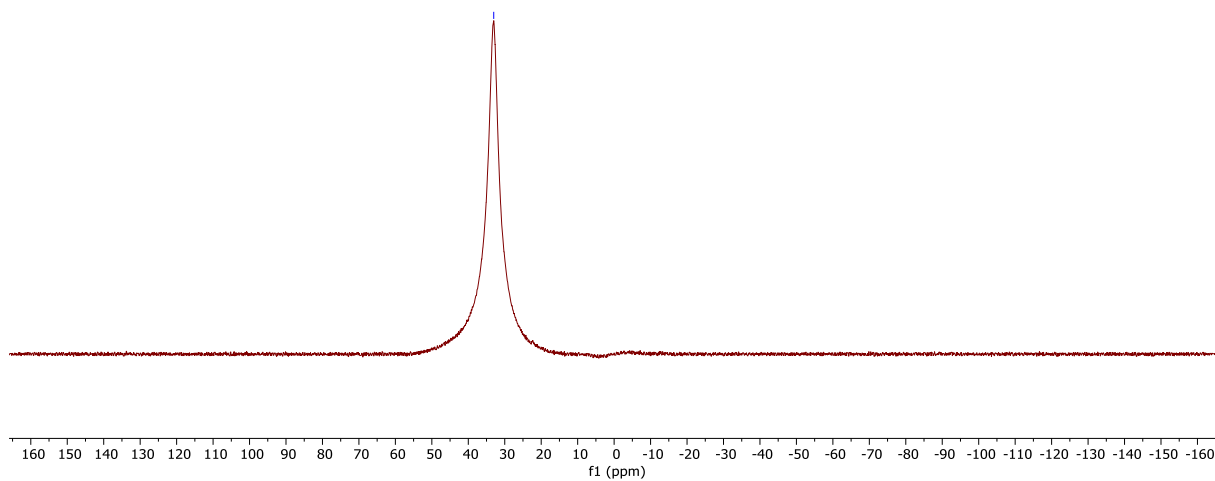

Yang Yuan YY-W-102-1 — Au1H CDC13 (C:\Bruker\TopSpin3.5\pl6) 2106 8 — 400.13 MHz

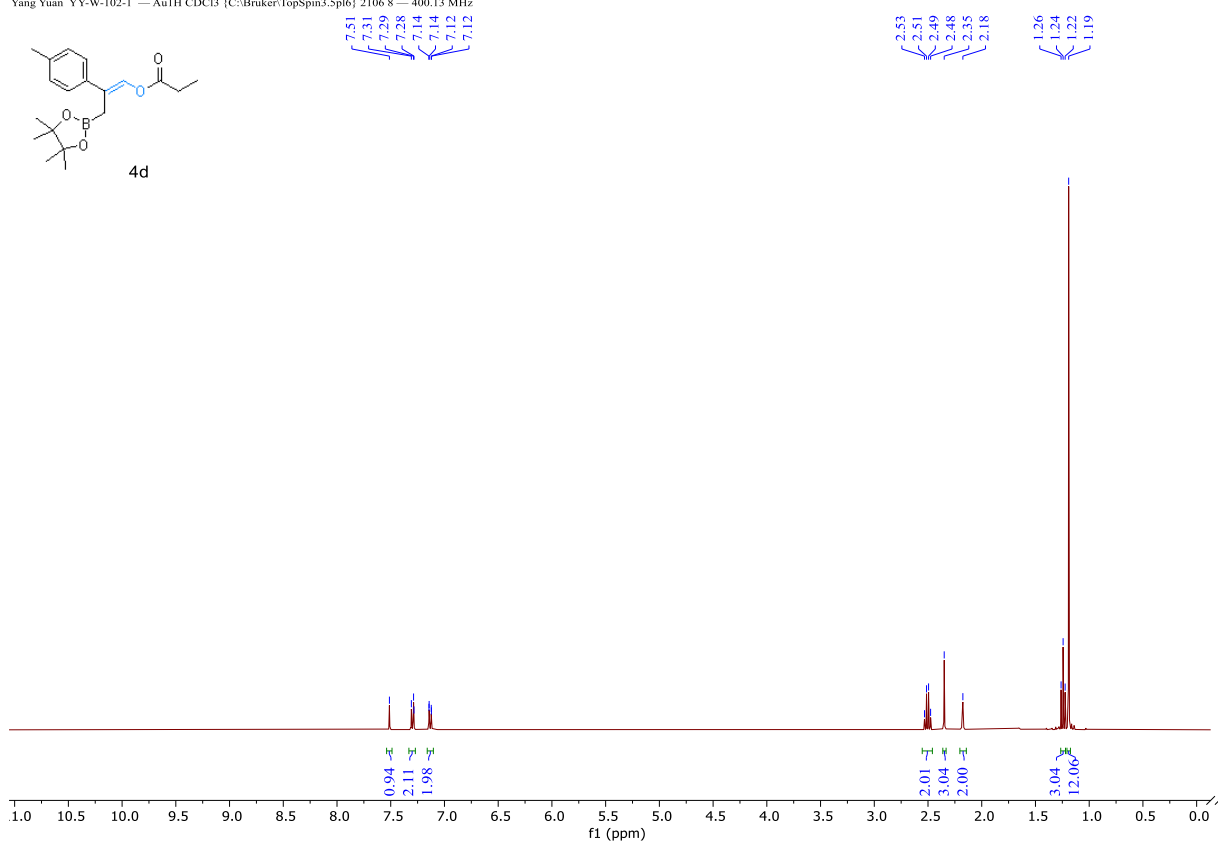

Yang Yuan YY-W-102-1 — Au13C CDC13 (C:\Bruker\TopSpin3.5\pl6) 2106 8 — 100.63 MHz

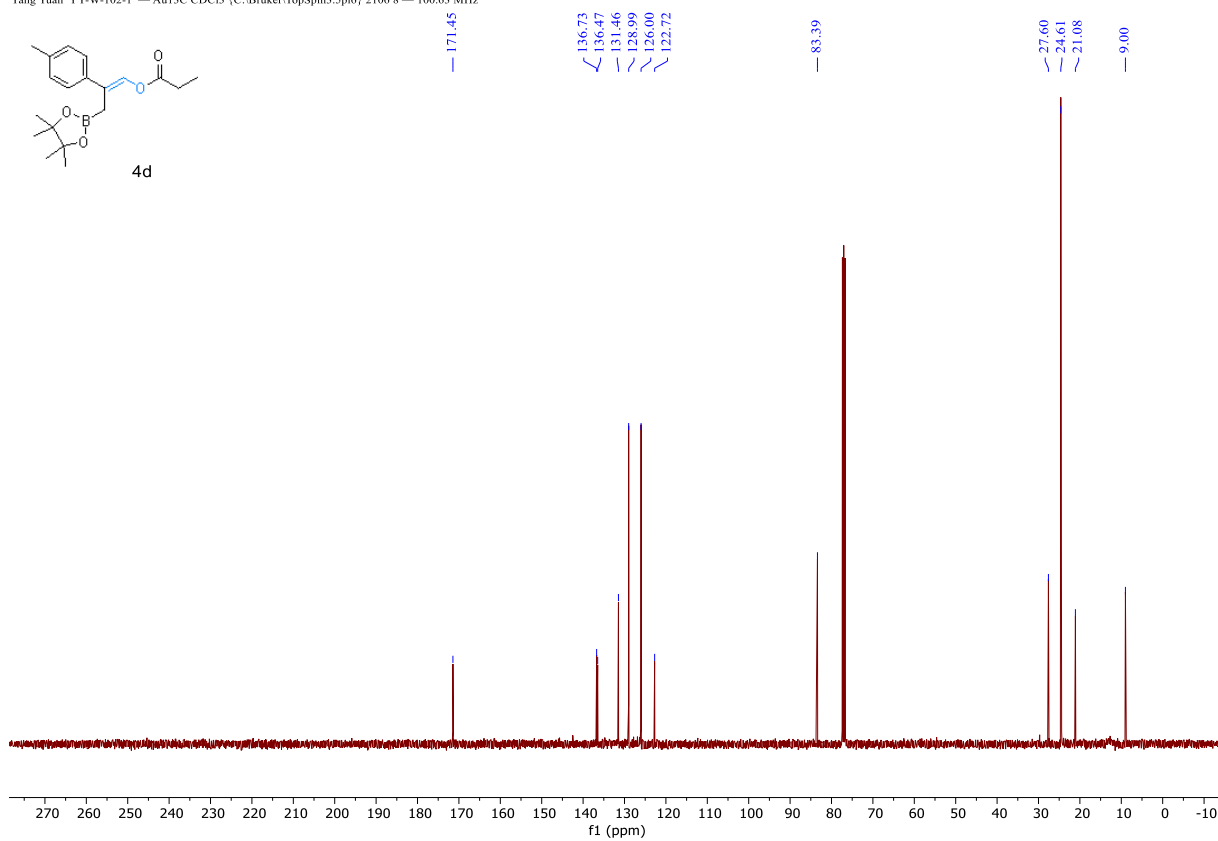

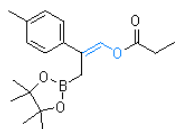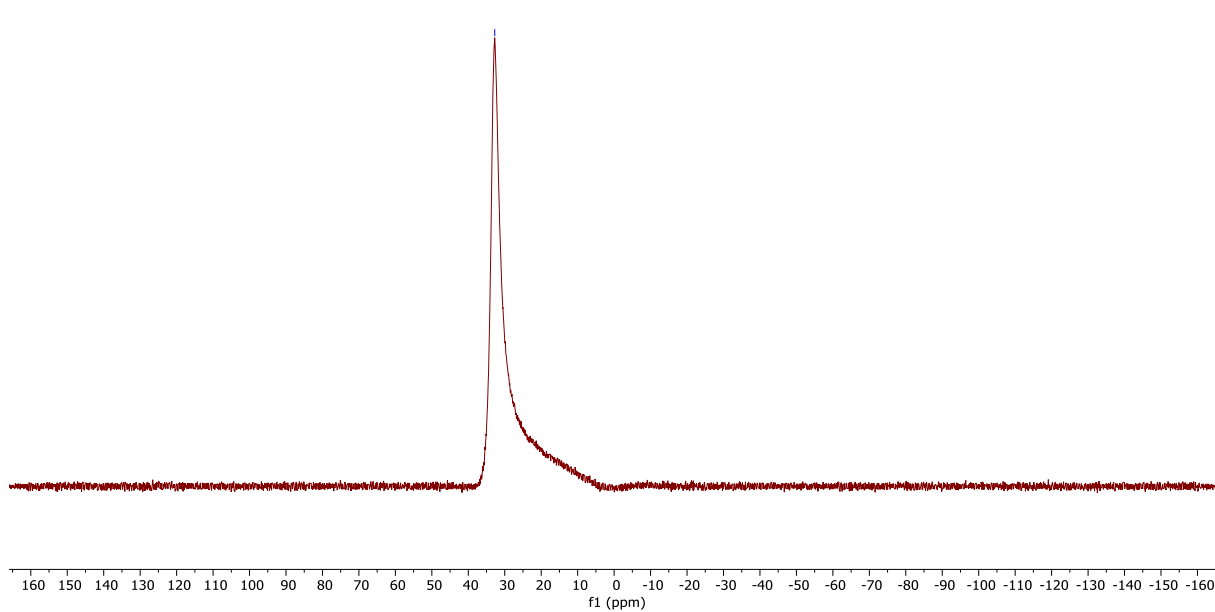

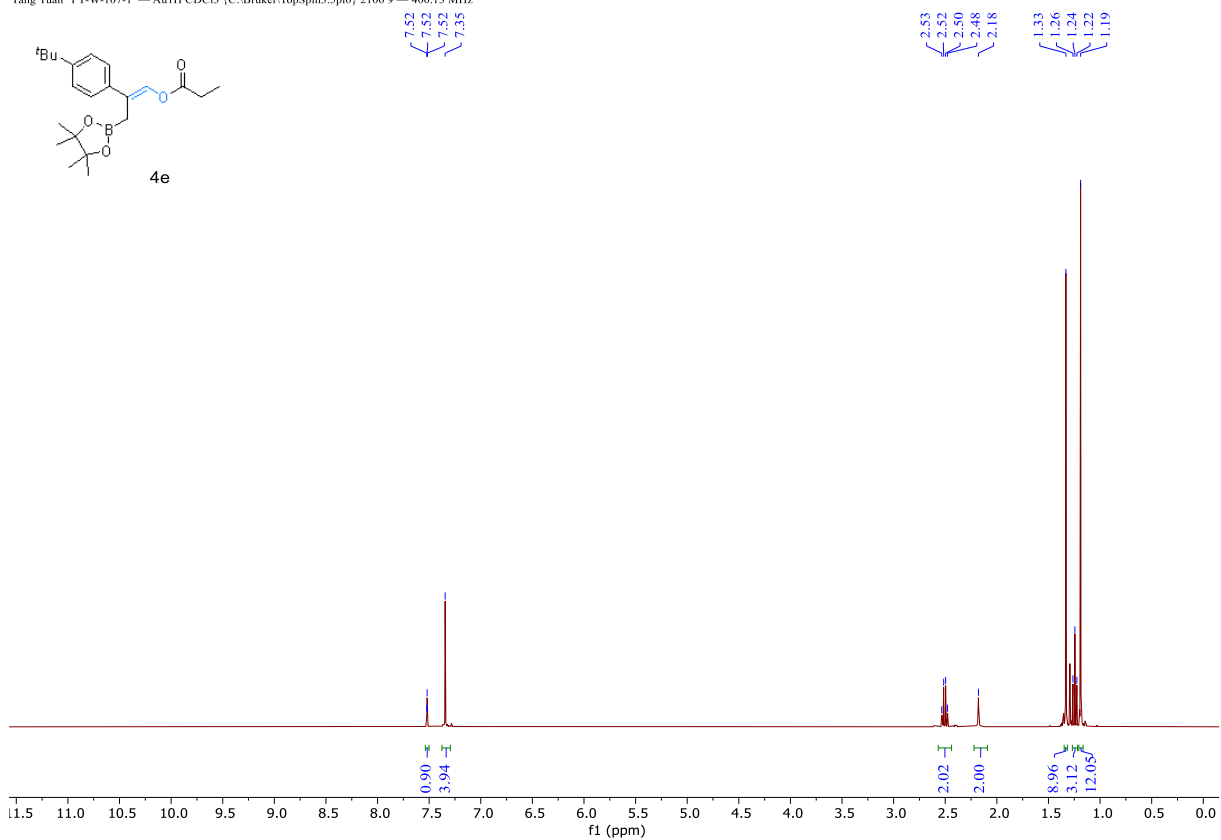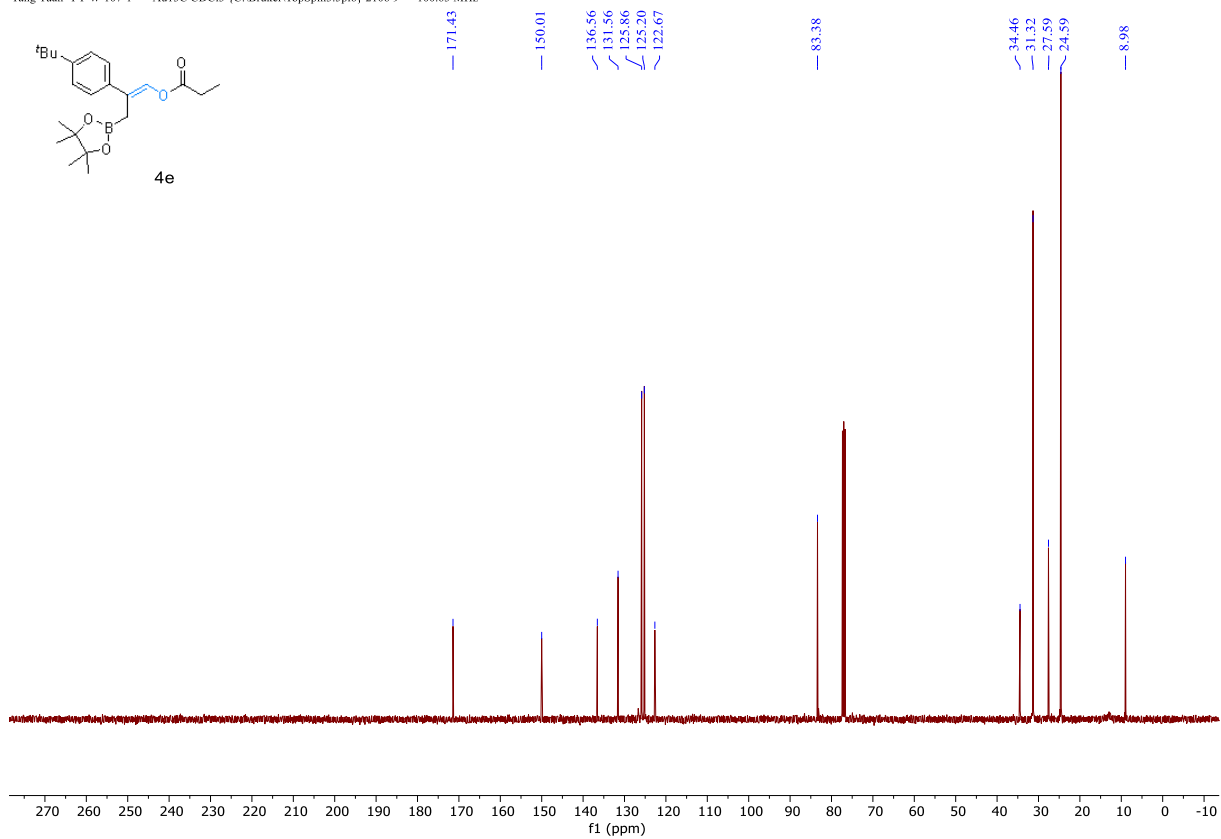

Yang Yuan YY-W-124 — Au1H CDCl3 [C:\Bruker\TopSpin3.5\pl6] 2106 5 — 400.13 MHz

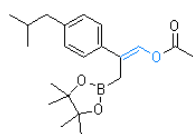

4f  
E/Z = 3.5/1

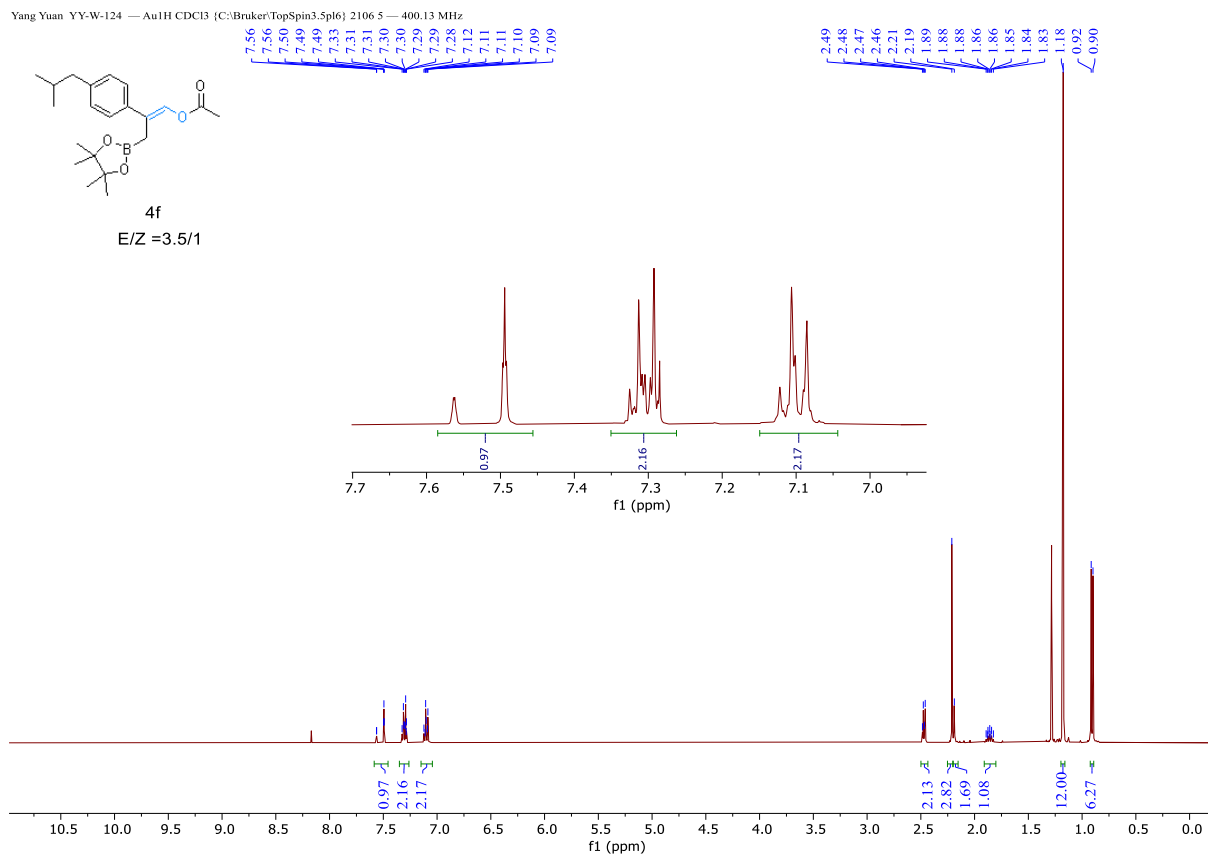

Yang Yuan YY-W-124 — Au13C CDCl3 [C:\Bruker\TopSpin3.5\pl6] 2106 5 — 100.63 MHz

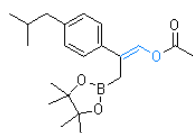

4f  
E/Z = 3.5/1

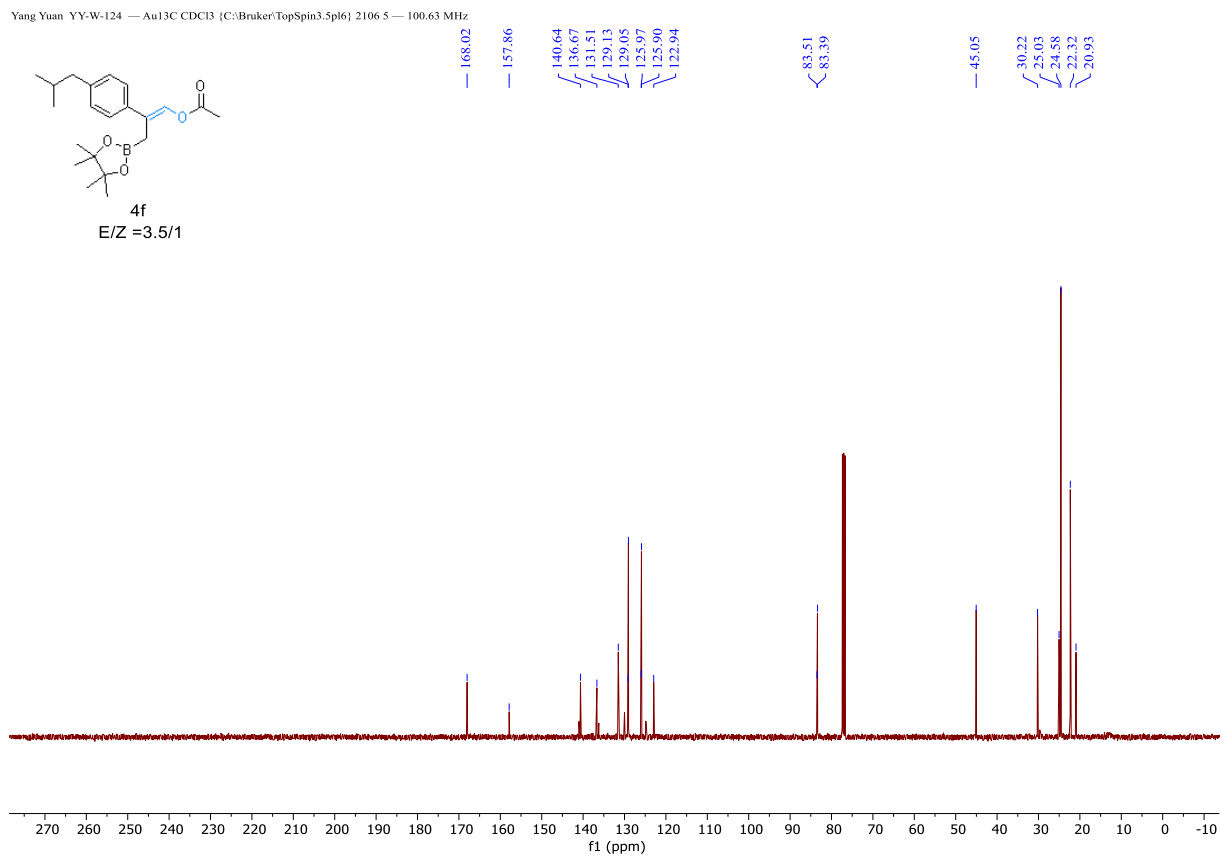



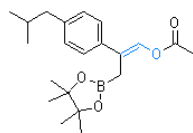

4f  
E/Z = 3.5/1

— 32.67

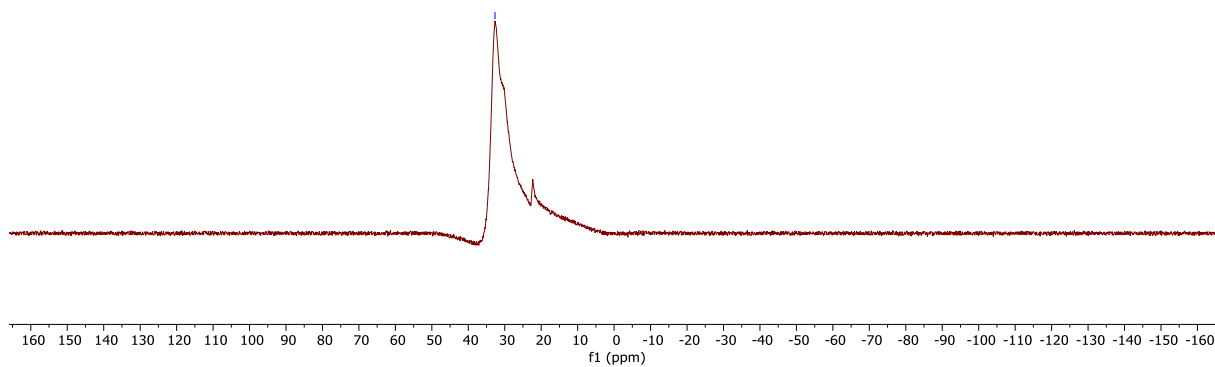

Yang Yuan YY-W-98 — Au1H CDC13 (C:\Bruker\TopSpin3.5\pl6) 2106 4 — 400.13 MHz

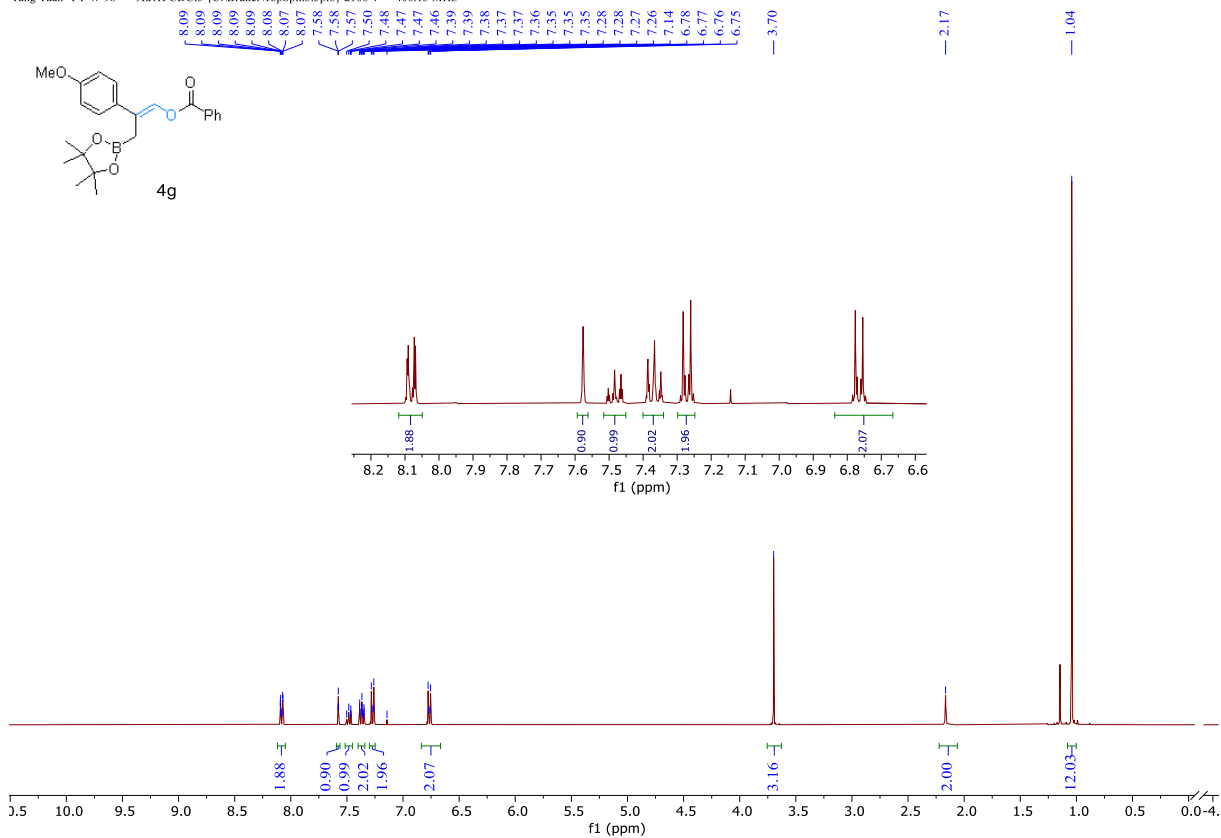

Yang Yuan YY-W-98 — Au13C CDC13 (C:\Bruker\TopSpin3.5\pl6) 2106 4 — 100.63 MHz

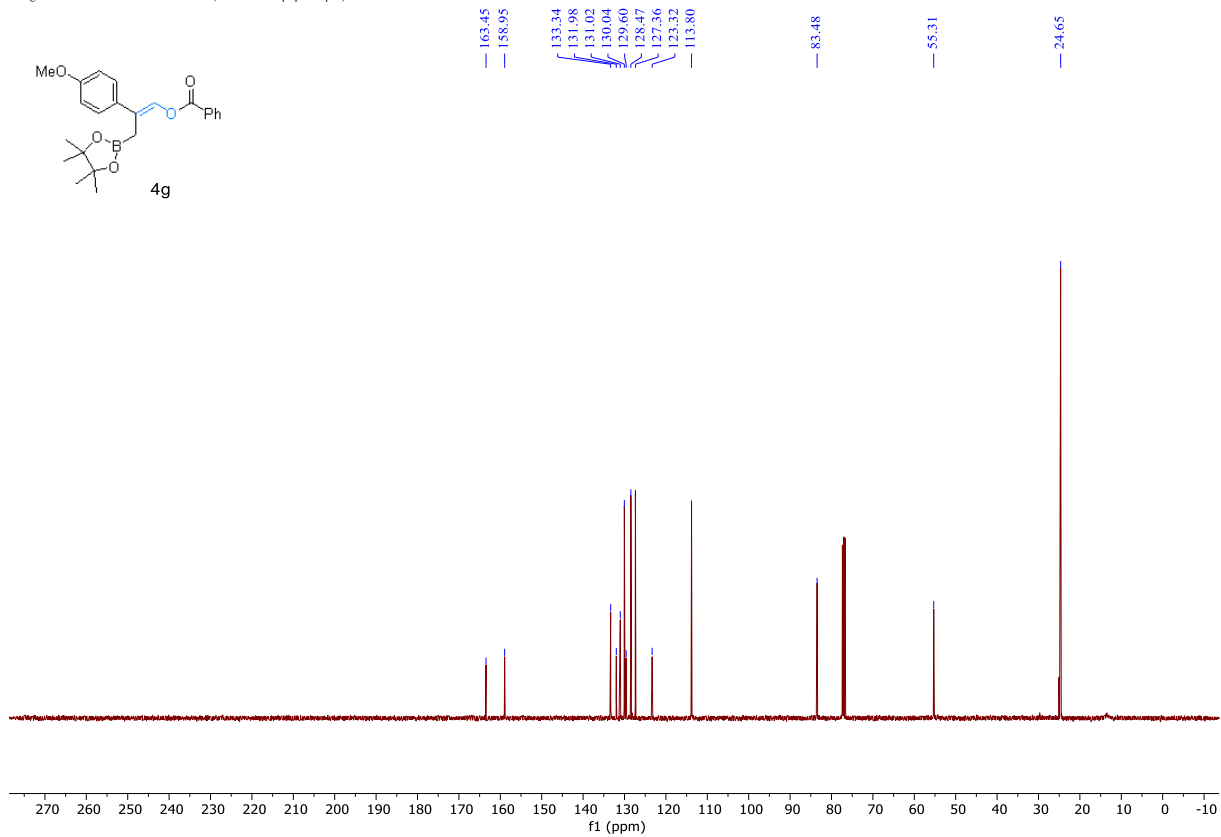

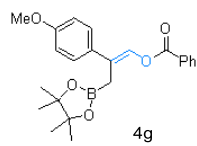

— 32.56

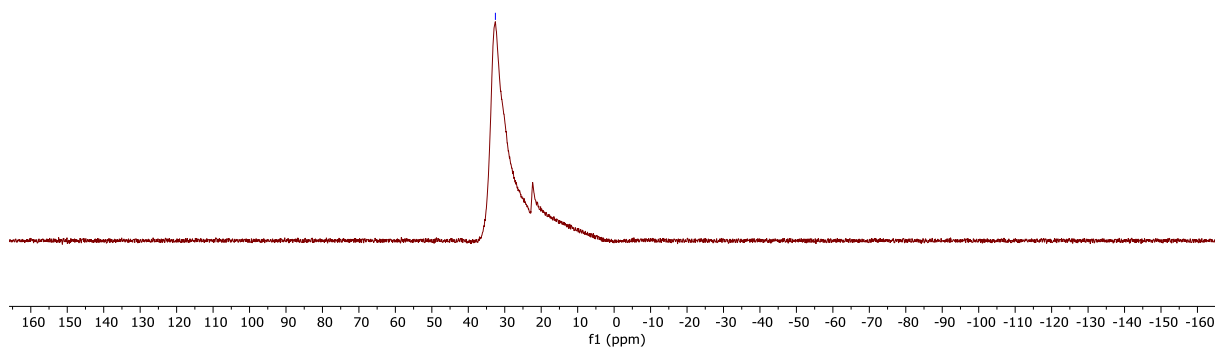

Yuan/YY-w-135 — PROTON CDC13 (C:\Bruker\TopSpin3.6.2) 2106 35 — 300.20 MHz

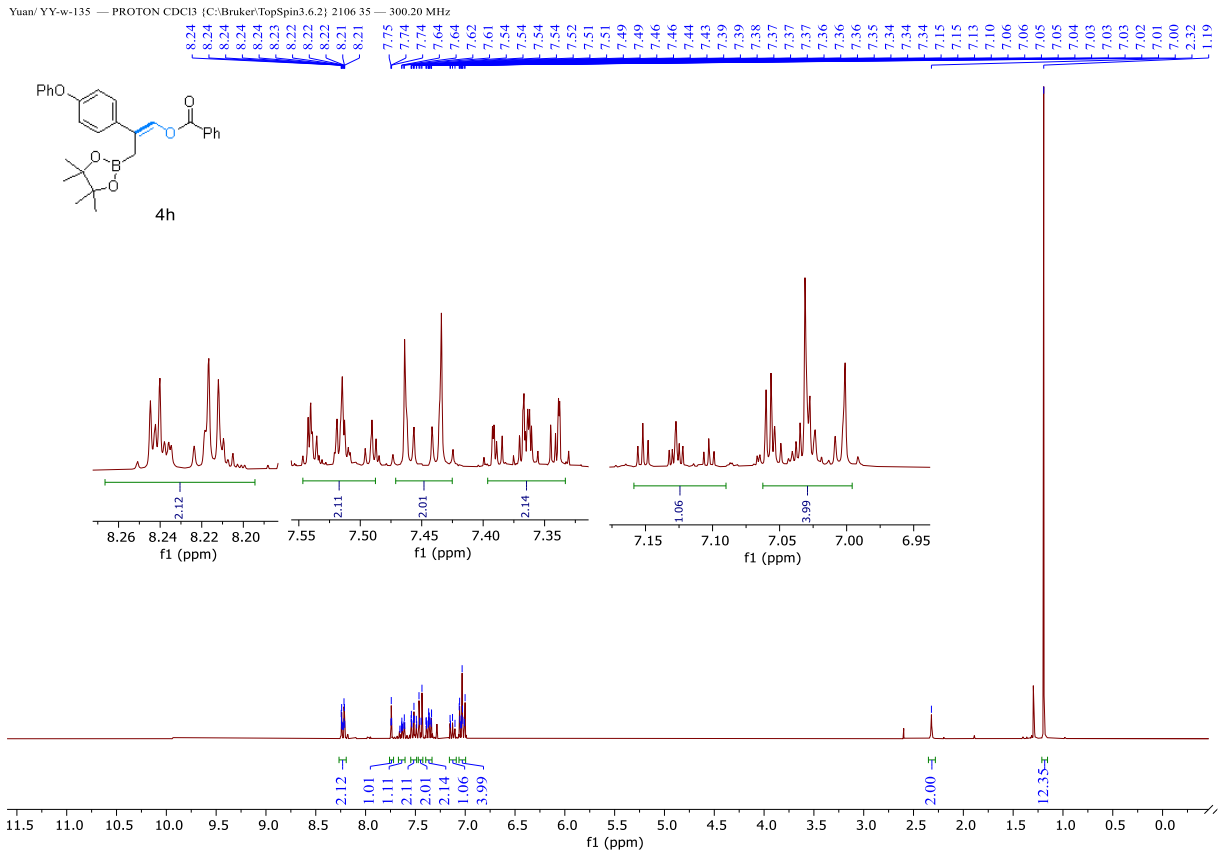

Yuan/YY-w-135 — C13CPD CDC13 (C:\Bruker\TopSpin3.6.2) 2106 35 — 75.49 MHz

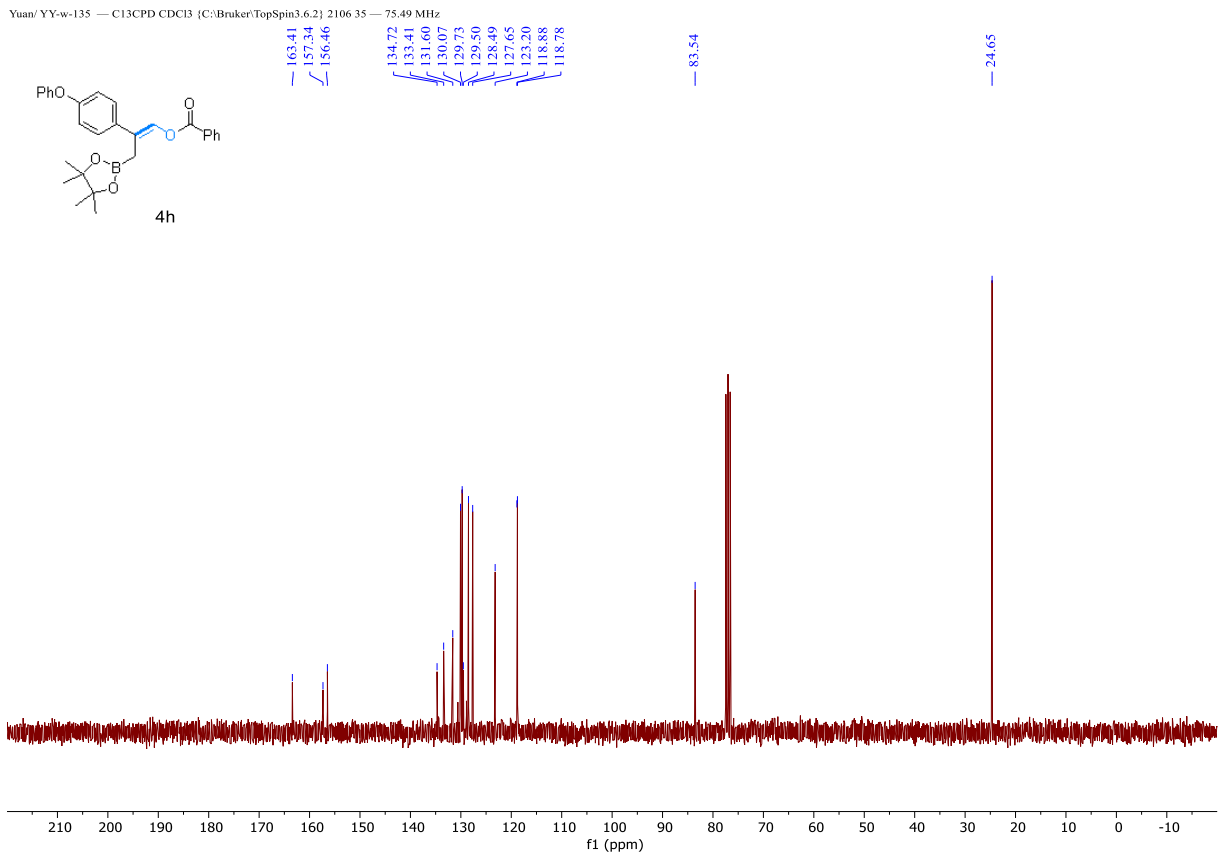

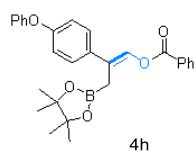

— 32.67

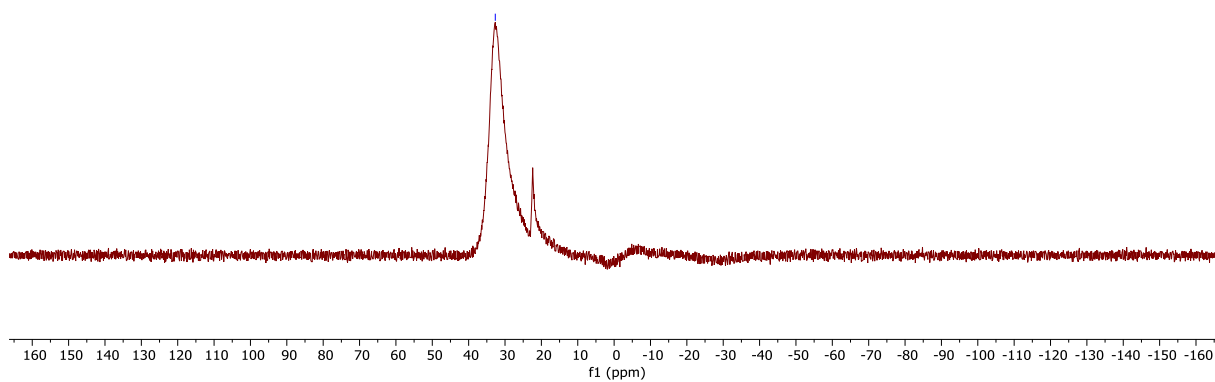

Yang Yuan YY-W-109 — Au1H CDC13 [C:\Bruker\TopSpin3.5\pl6] 2106 39 — 400.13 MHz

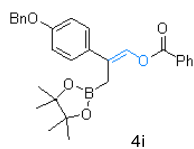

8.235  
8.235  
8.233  
8.222  
7.774  
7.773  
7.665  
7.664  
7.663  
7.662  
7.661  
7.611  
7.594  
7.584  
7.553  
7.552  
7.552  
7.500  
7.500  
7.499  
7.488  
7.477  
7.466  
7.446  
7.444  
7.444  
7.443  
7.443  
7.442  
7.442  
7.442  
7.442  
7.441  
7.441  
7.440  
7.440  
7.437  
7.437  
7.366  
7.000  
7.000  
6.998  
5.111  
2.332

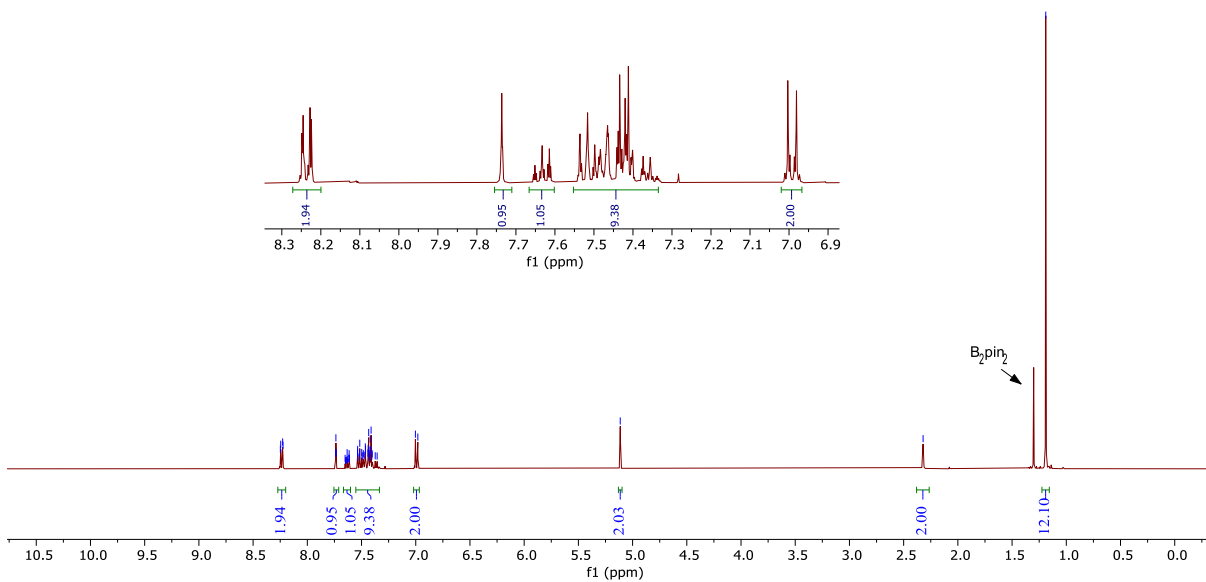

Yang Yuan YY-W-109 — Au13C CDC13 [C:\Bruker\TopSpin3.5\pl6] 2106 39 — 100.63 MHz

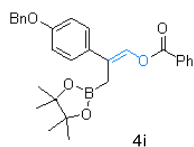

163.44  
158.16  
137.05  
133.37  
132.27  
131.10  
130.06  
129.60  
128.60  
128.48  
127.96  
127.48  
127.39  
123.31

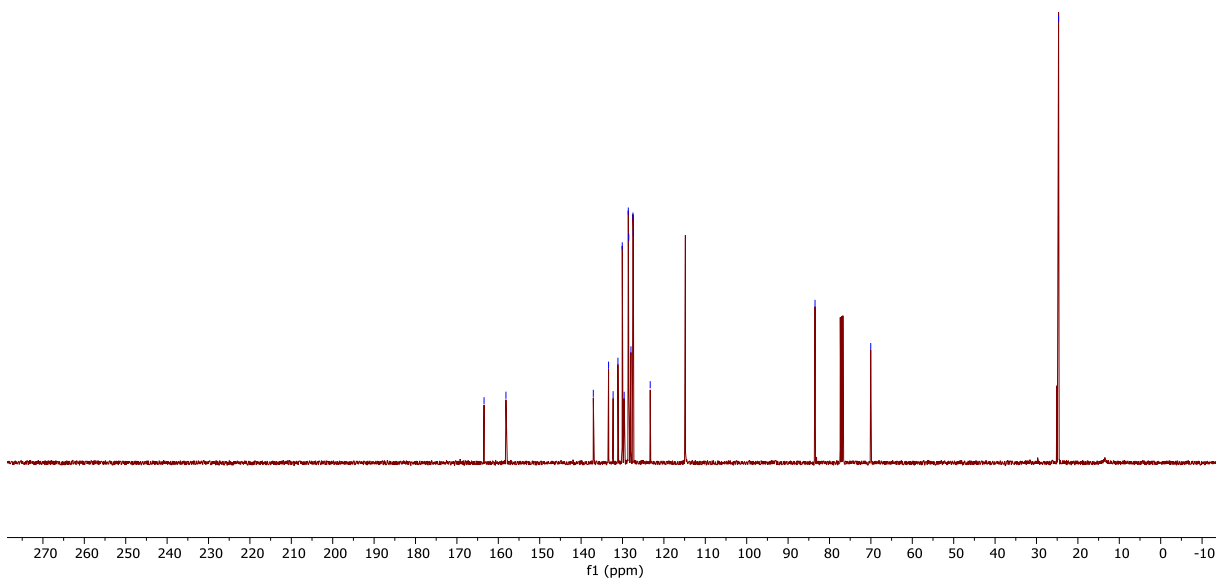

Yang Yuan YY-W-108 — Au1H CDC13 [C:\Bruker\TopSpin3.5\pl6] 2106 38 — 400.13 MHz

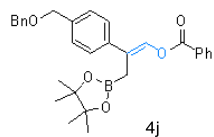

8.22  
8.22  
8.22  
8.20  
8.20  
7.78  
7.65  
7.62  
7.61  
7.60  
7.60  
7.59  
7.51  
7.51  
7.50  
7.49  
7.48  
7.48  
7.47  
7.47  
7.46  
7.46  
7.45  
7.45  
7.38  
7.37  
7.37  
7.34  
7.34  
7.32  
7.32  
7.32  
7.31  
7.31  
7.30  
4.57  
4.56  
— 2.31  
— 1.17

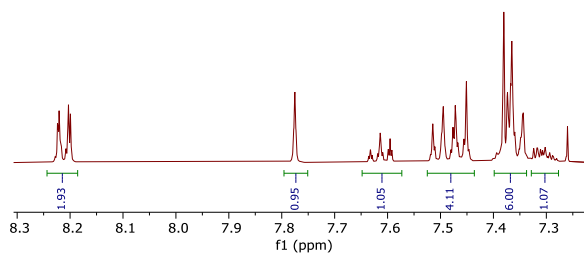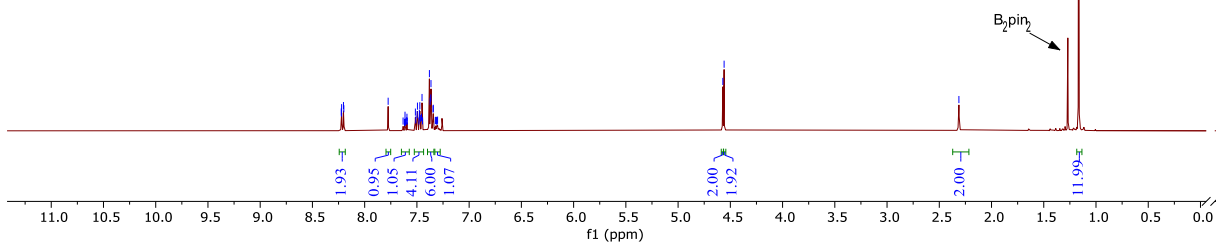

Yang Yuan YY-W-108 — Au13C CDC13 [C:\Bruker\TopSpin3.5\pl6] 2106 38 — 100.63 MHz

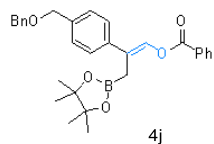

163.39  
138.94  
138.30  
137.19  
133.44  
131.97  
130.09  
129.49  
128.50  
128.43  
127.93  
127.83  
127.66  
126.28  
123.51  
— 83.52  
— 71.98  
— 71.83  
— 24.66

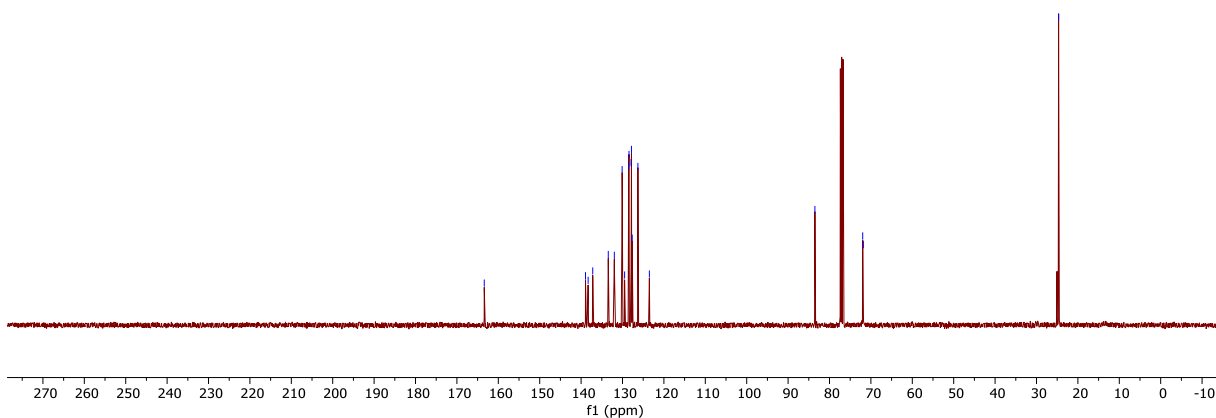

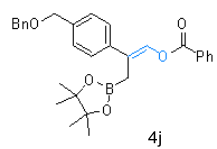

— 32.64

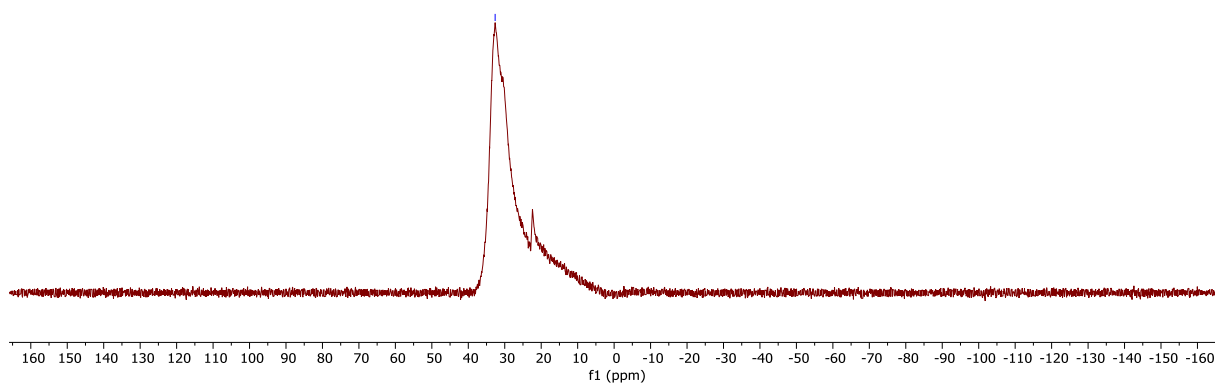



Yang Yuan YY-W-97-1 — Au1H CDCl3 (C:\Bruker\TopSpin3.5\pl6) 2106 7 — 400.13 MHz

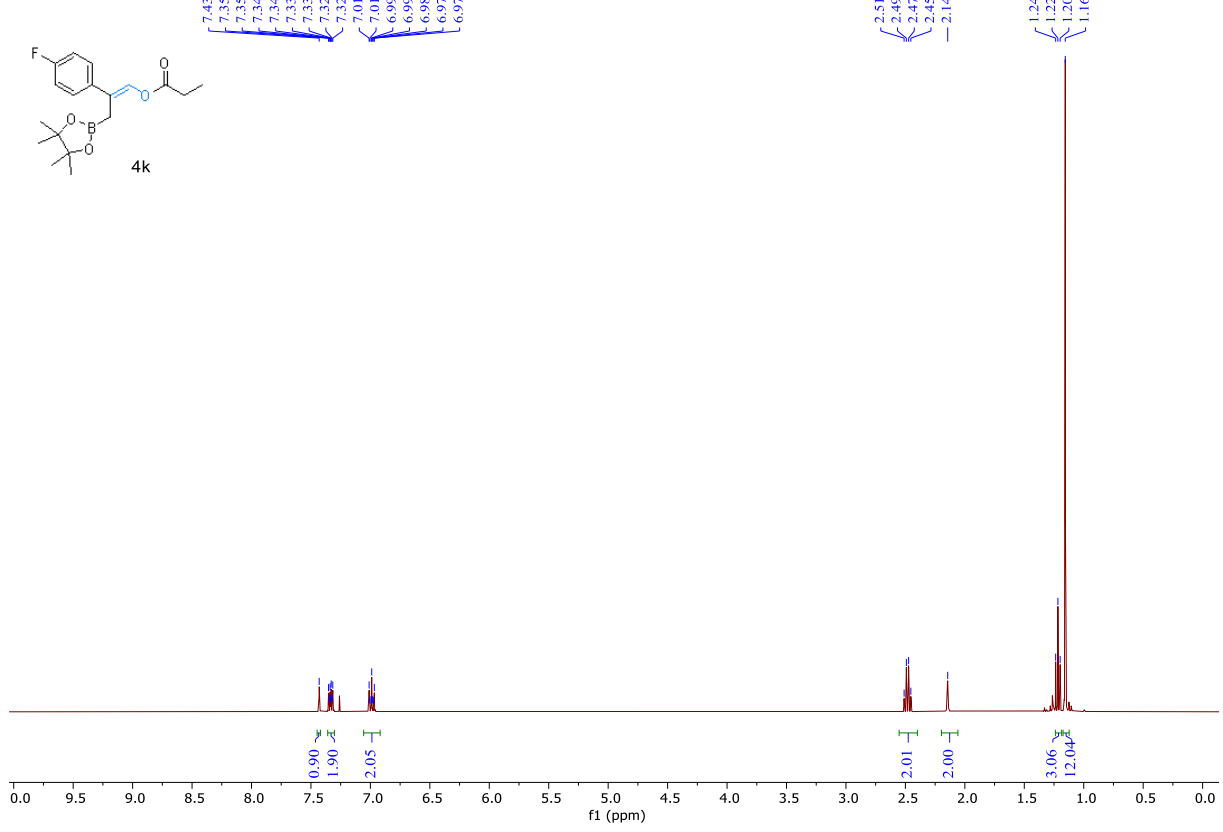

Yang Yuan YY-W-97-1 — Au13C CDCl3 (C:\Bruker\TopSpin3.5\pl6) 2106 7 — 100.63 MHz

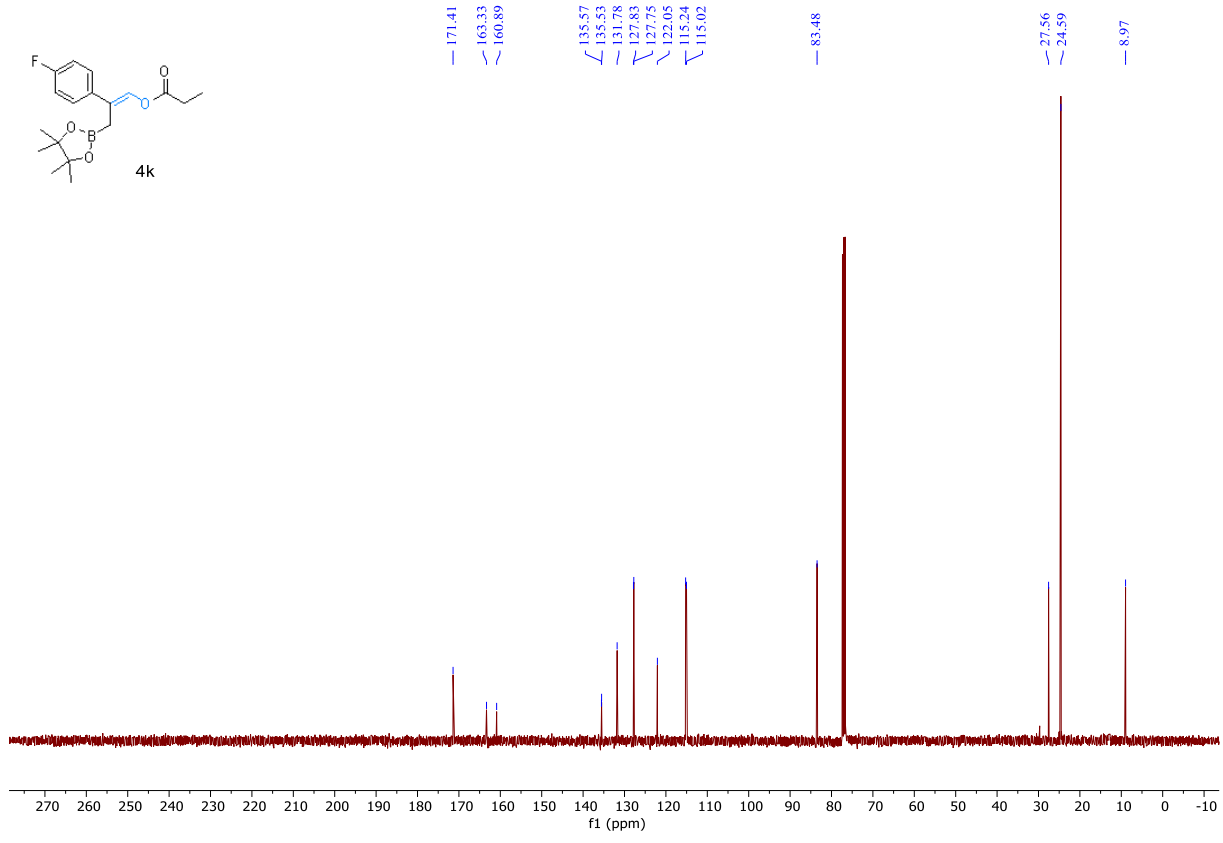

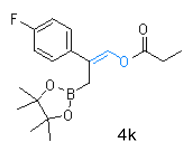

32.69

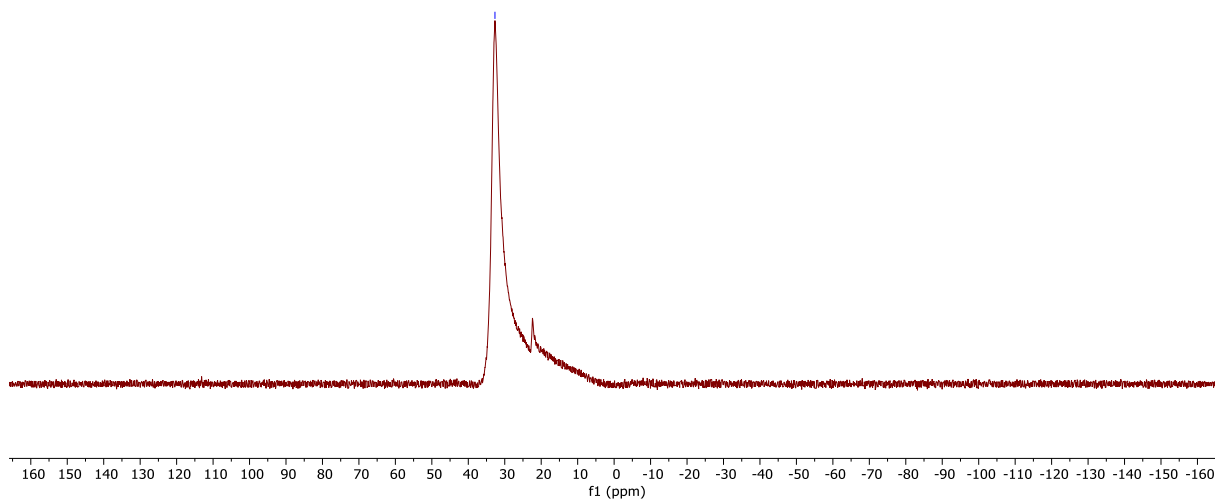

Yang Yuan YY-W-111 — Au1H CDCl3 (C:\Bruker\TopSpin3.5\pl6) 2106.36 — 400.13 MHz

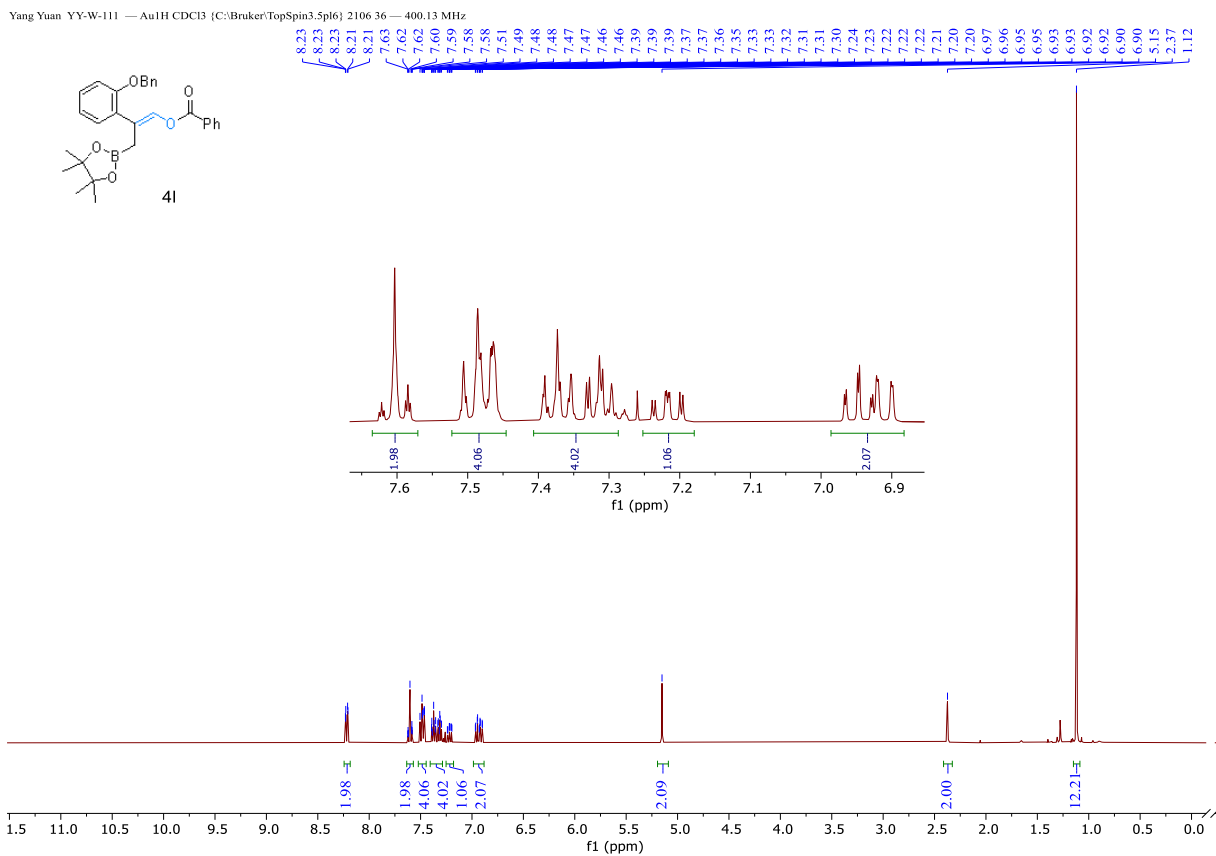

Yang Yuan YY-W-111 — Au13C CDCl3 (C:\Bruker\TopSpin3.5\pl6) 2106.36 — 100.63 MHz

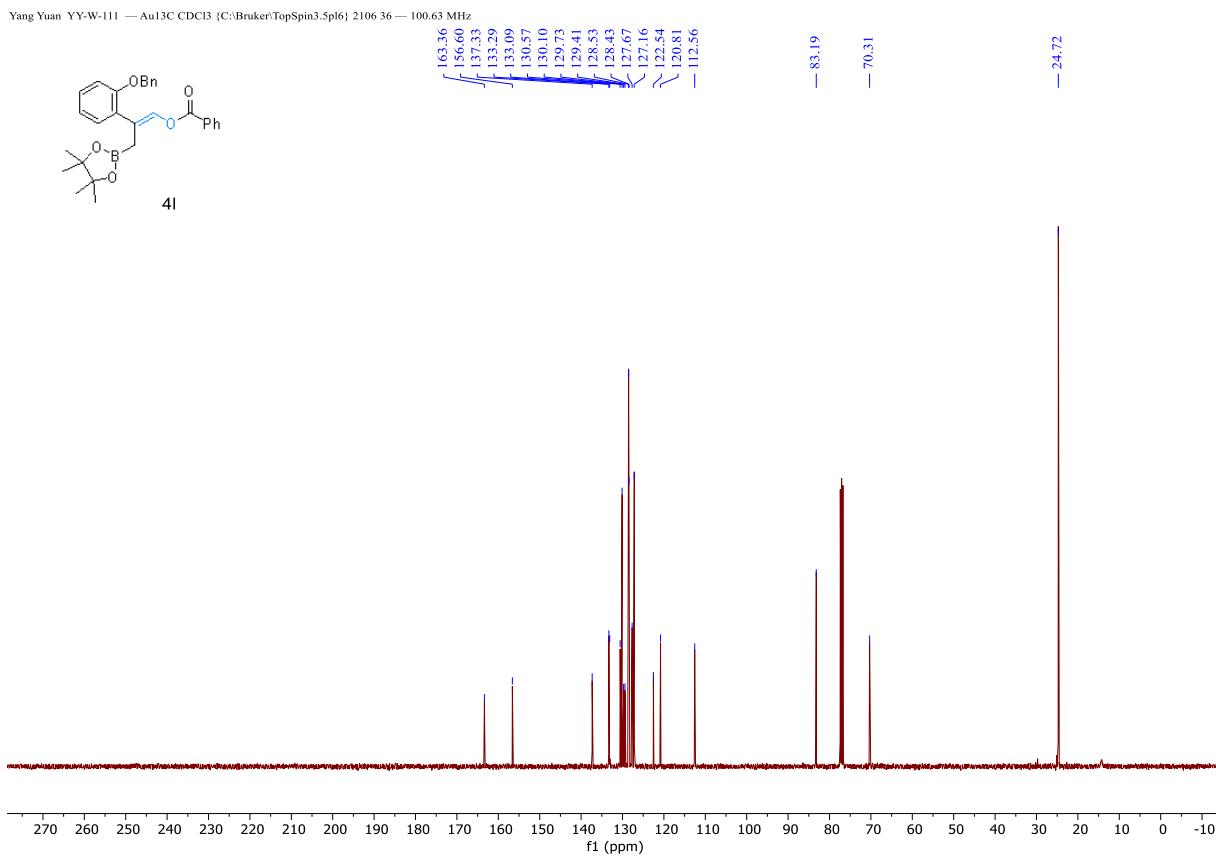

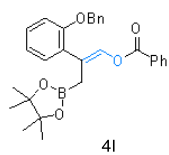

— 32.35

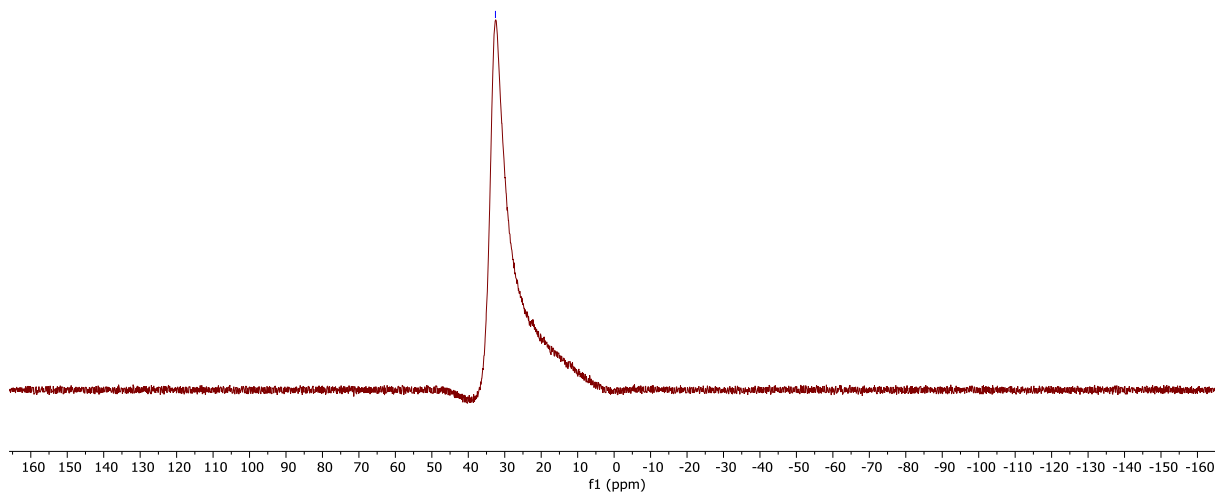

Yang Yuan YY-W-105-1 — Au1H CDCl3 (C:\Bruker\TopSpin3.5pl6) 2106 7 — 400.13 MHz

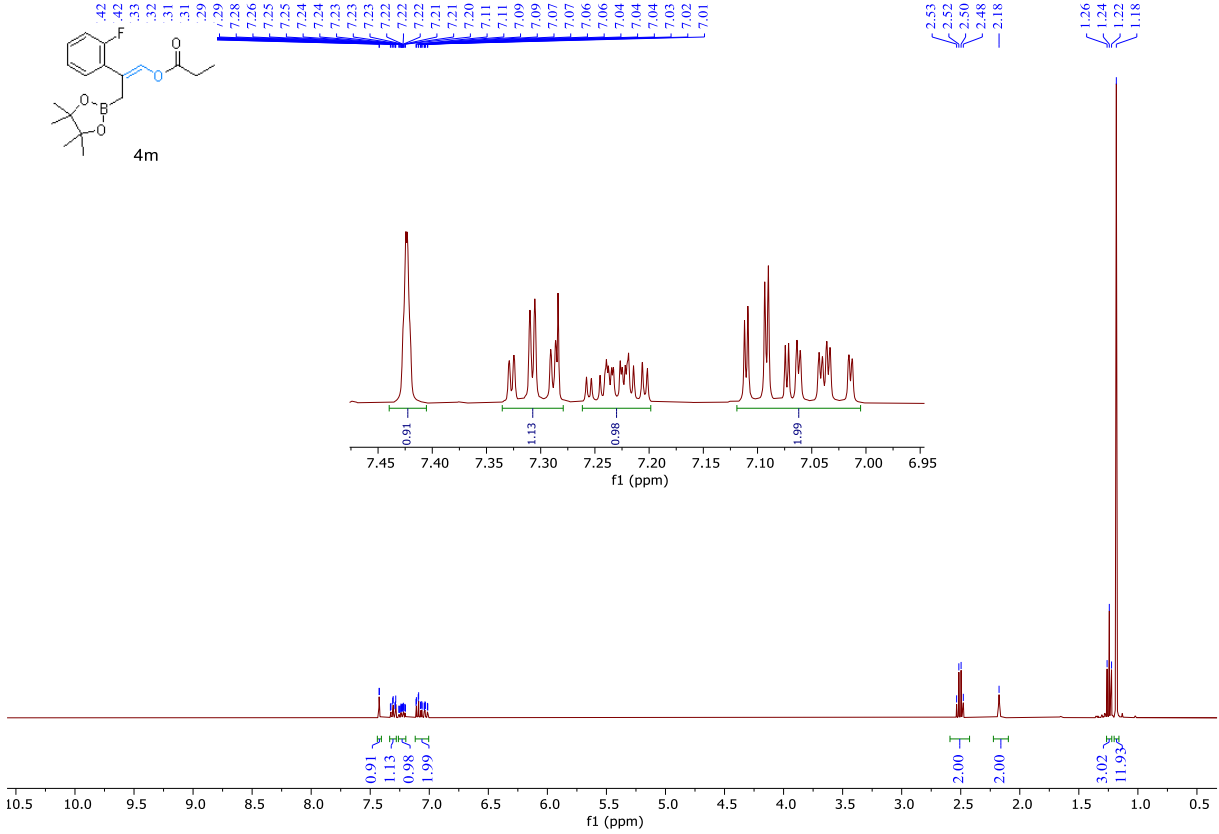

Yang Yuan YY-W-105-1 — Au13C CDCl3 (C:\Bruker\TopSpin3.5pl6) 2106 7 — 100.63 MHz

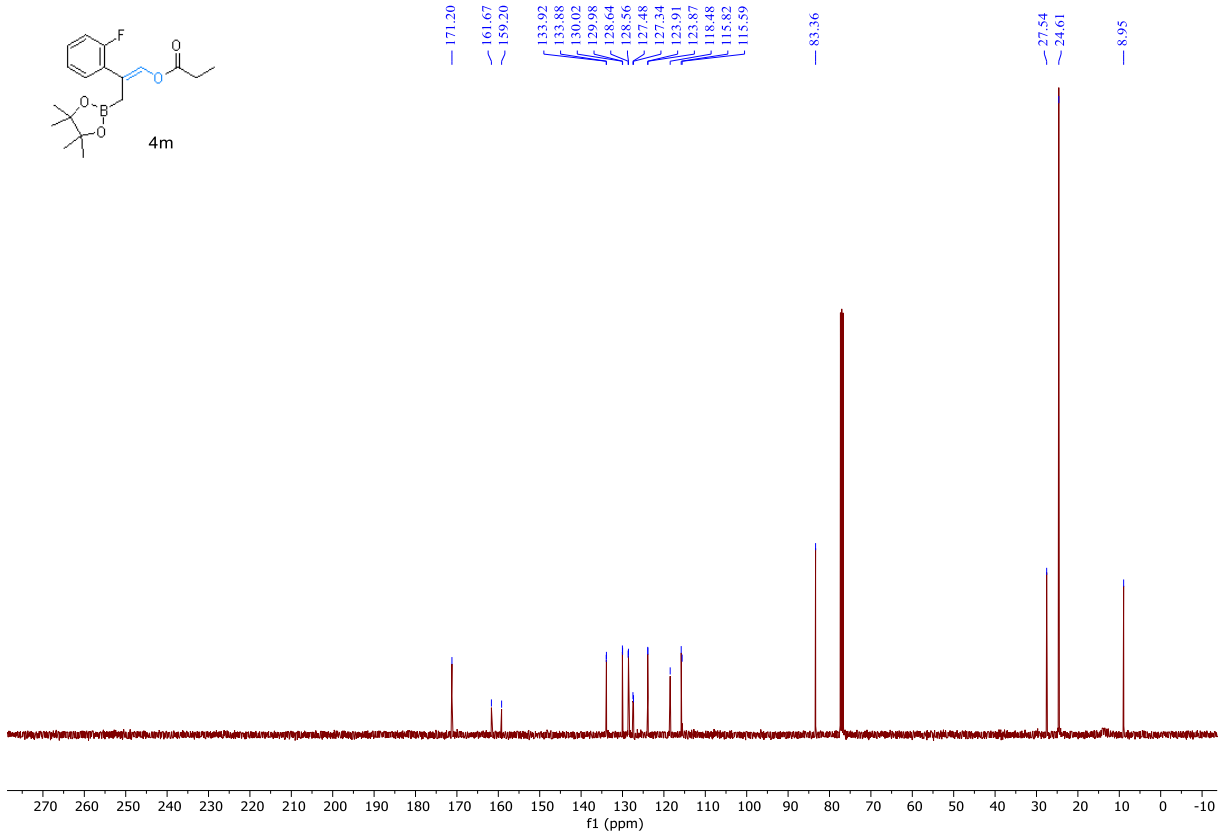

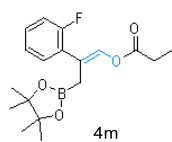

— 32.53

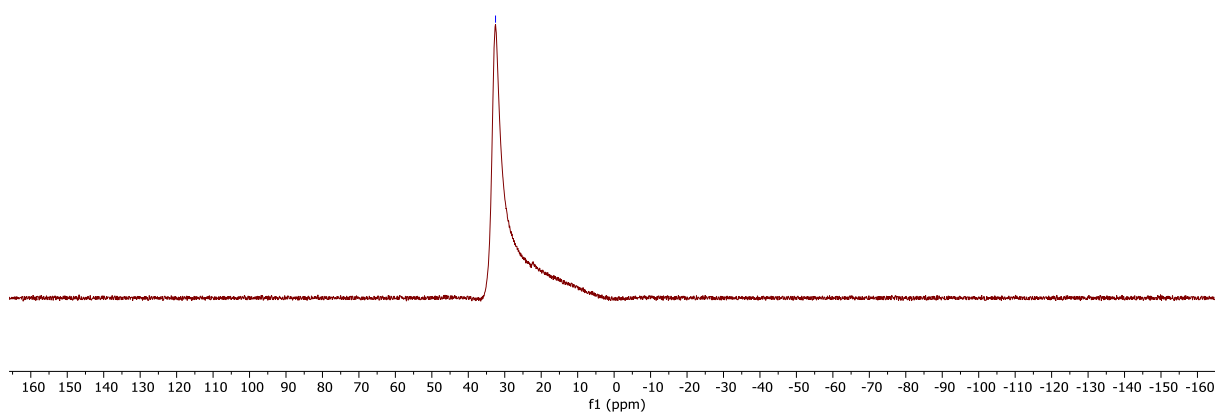

Yang Yuan YY-W-103-1 — Au1H CDC13 (C:\Bruker\TopSpin3.5pl6) 2106 9 — 400.13 MHz

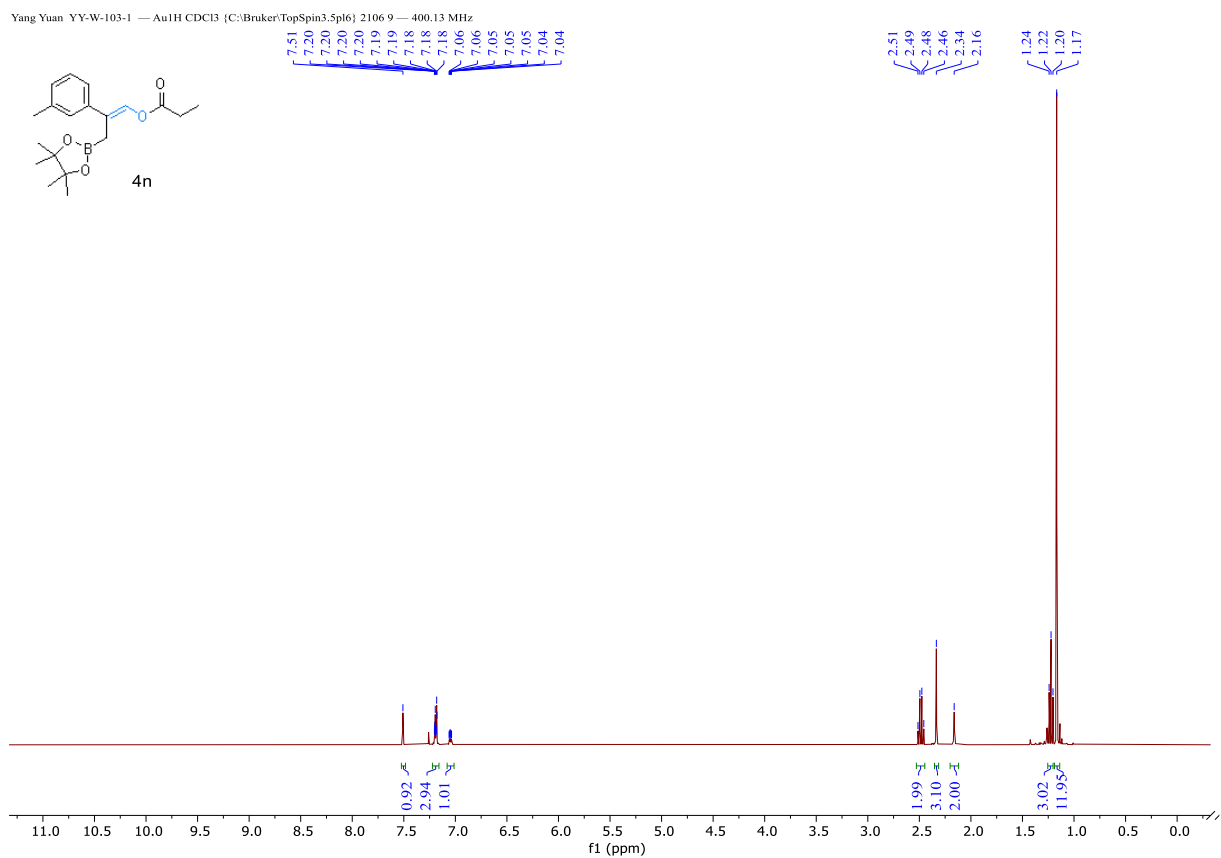

Yang Yuan YY-W-103-1 — Au13C CDC13 (C:\Bruker\TopSpin3.5pl6) 2106 9 — 100.63 MHz

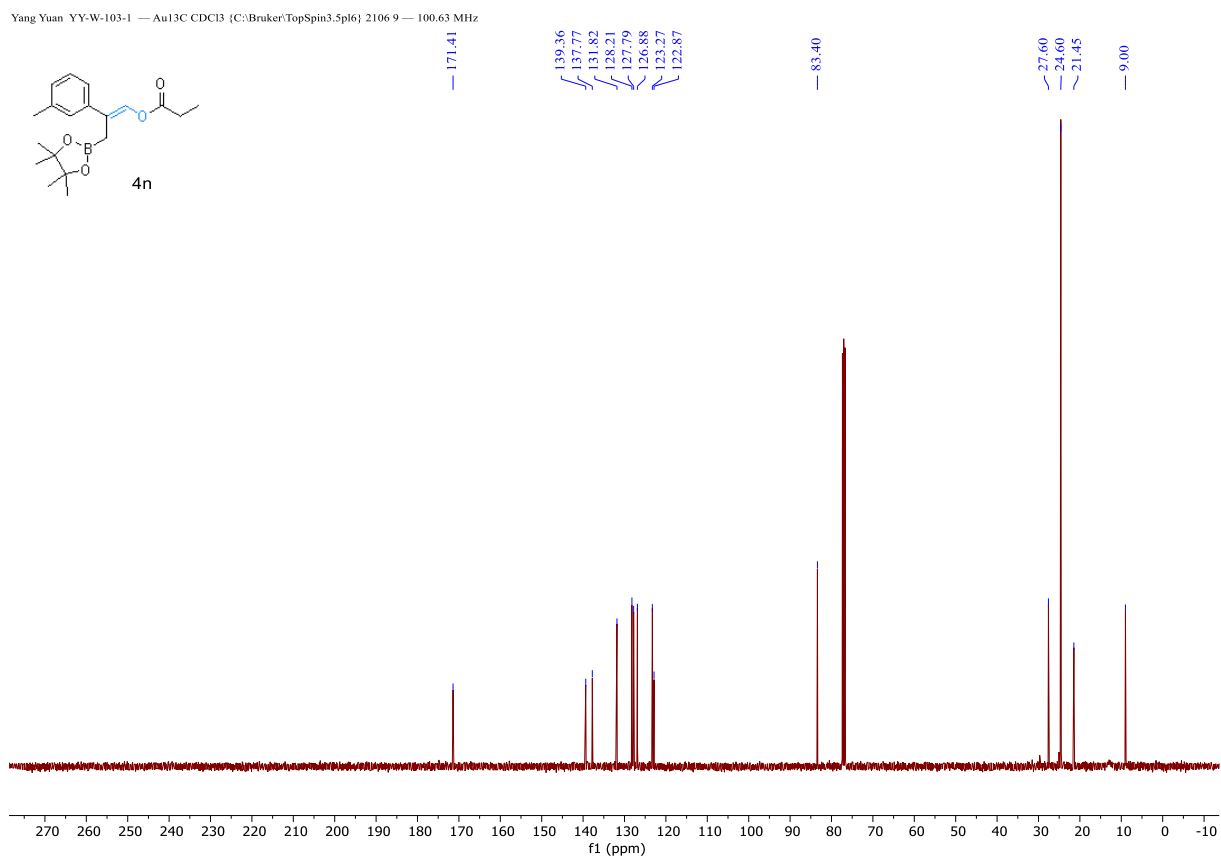

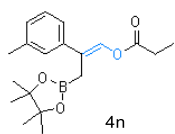

— 32.75

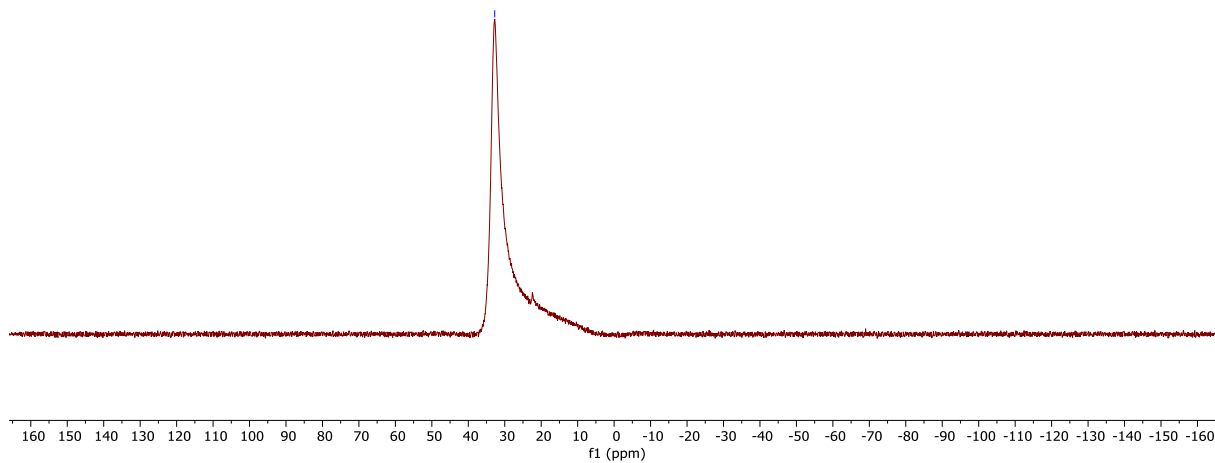



Yang Yuan YY-W-106-1 — Au1H CDCl3 (C:\Bruker\TopSpin3.5\pl6) 2106 8 — 400.13 MHz

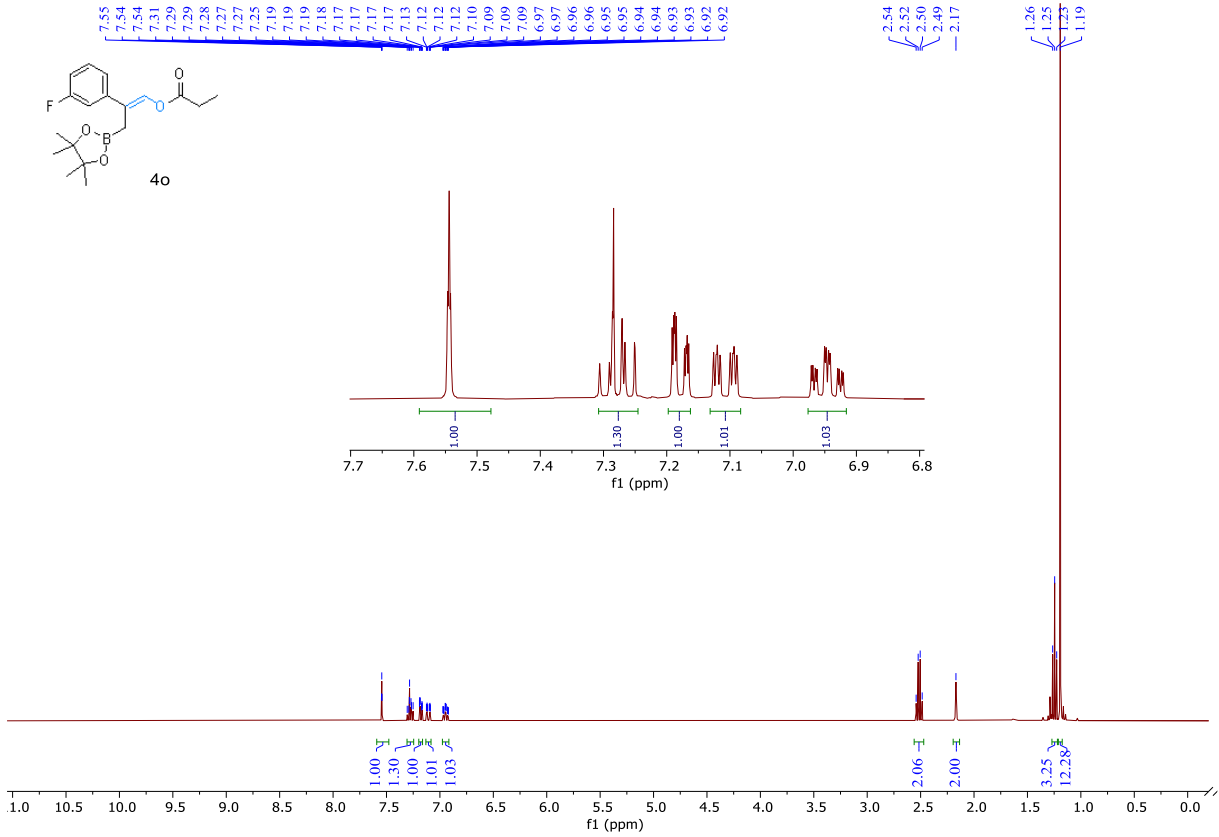

Yang Yuan YY-W-106-1 — Au13C CDCl3 (C:\Bruker\TopSpin3.5\pl6) 2106 8 — 100.63 MHz

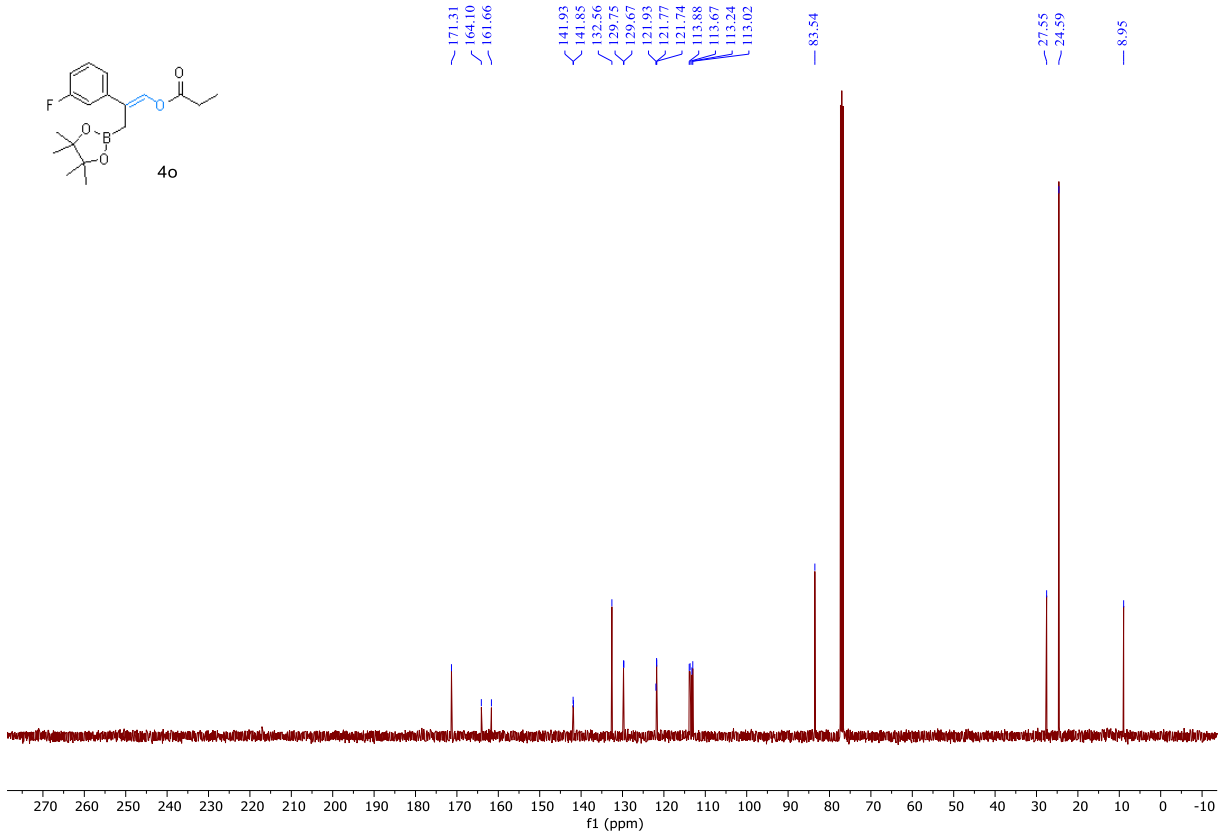

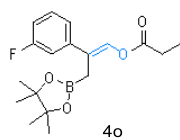

— 32.67

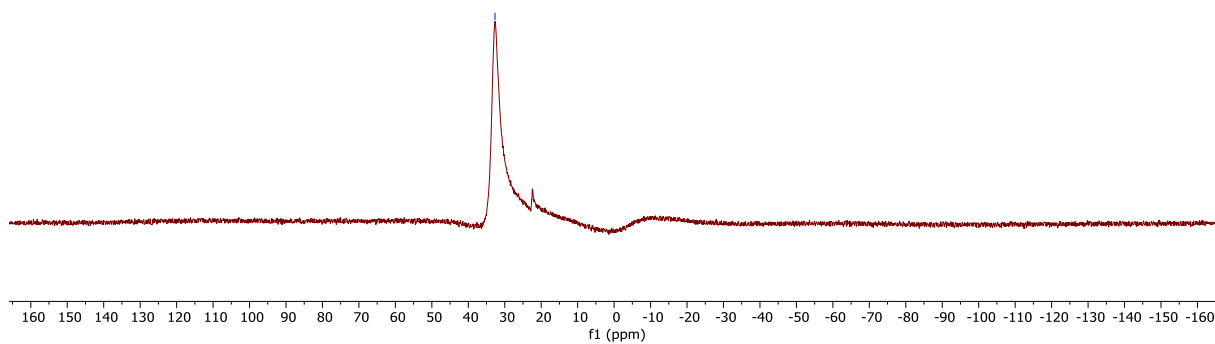

Yang Yuan YY-W-112 — Au1H CDC13 [C:\Bruker\TopSpin3.5\pl6] 2106 37 — 400.13 MHz

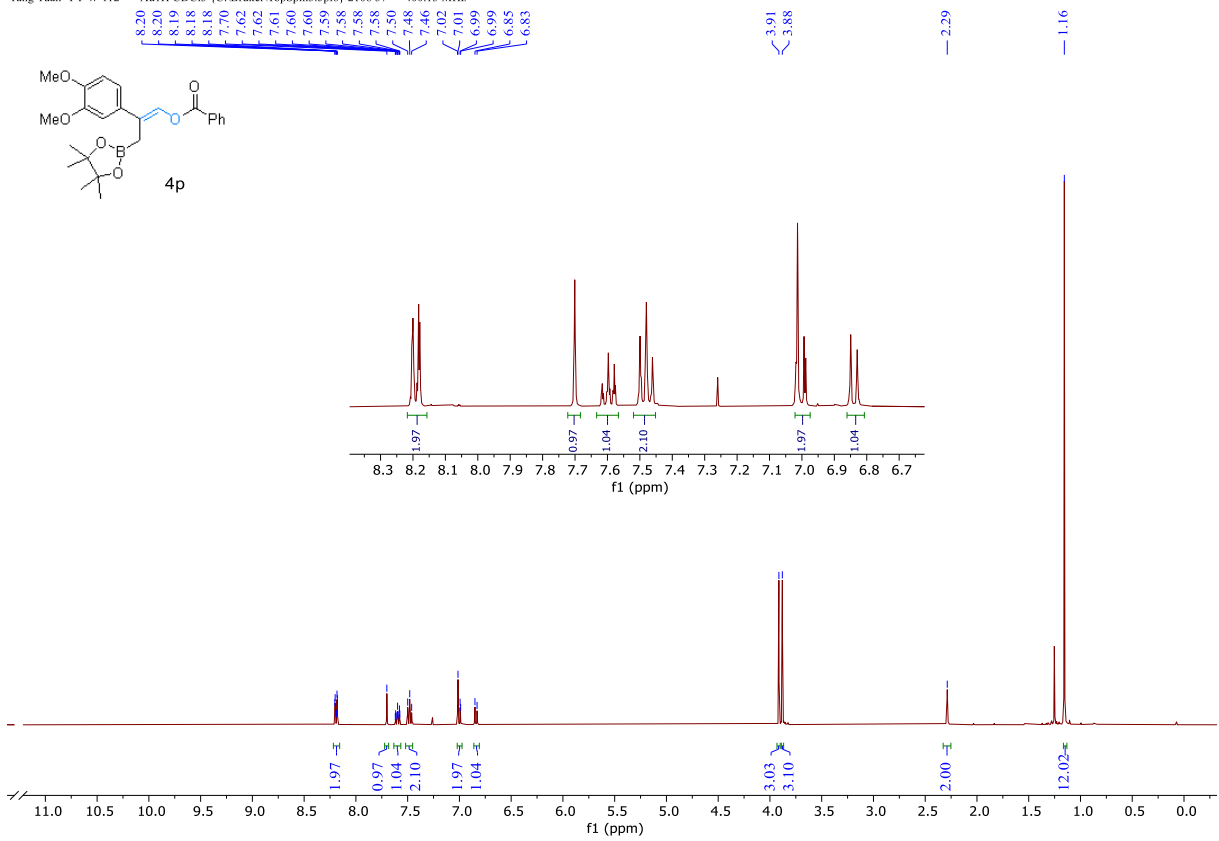

Yang Yuan YY-W-112 — Au13C CDC13 [C:\Bruker\TopSpin3.5\pl6] 2106 37 — 100.63 MHz

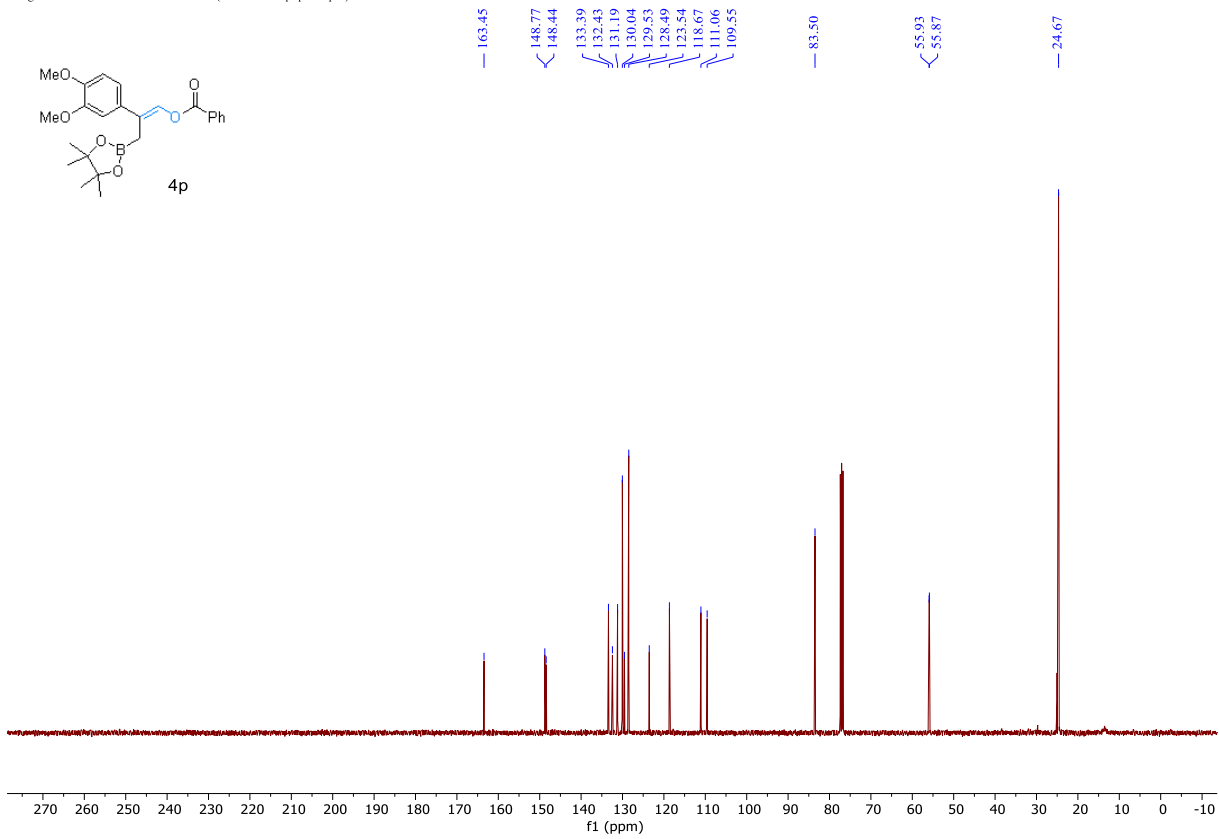

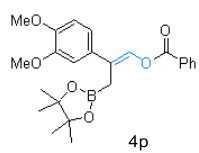

— 32.59

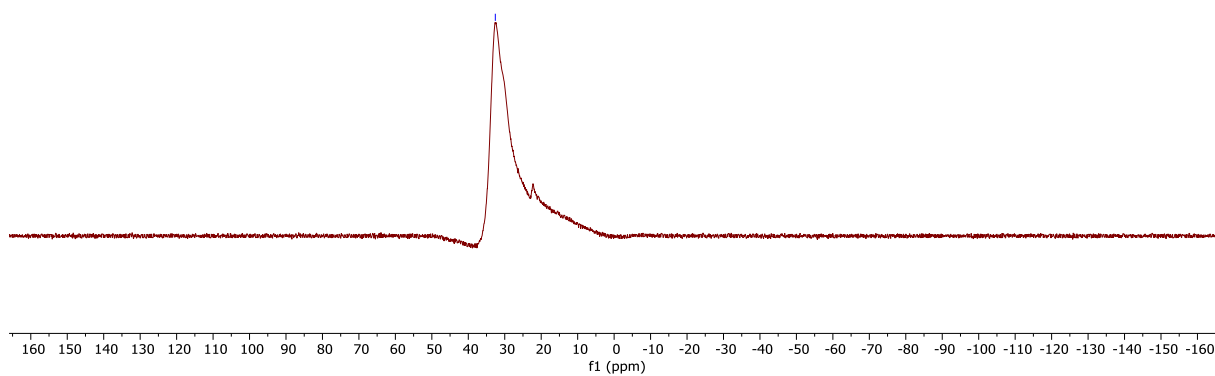

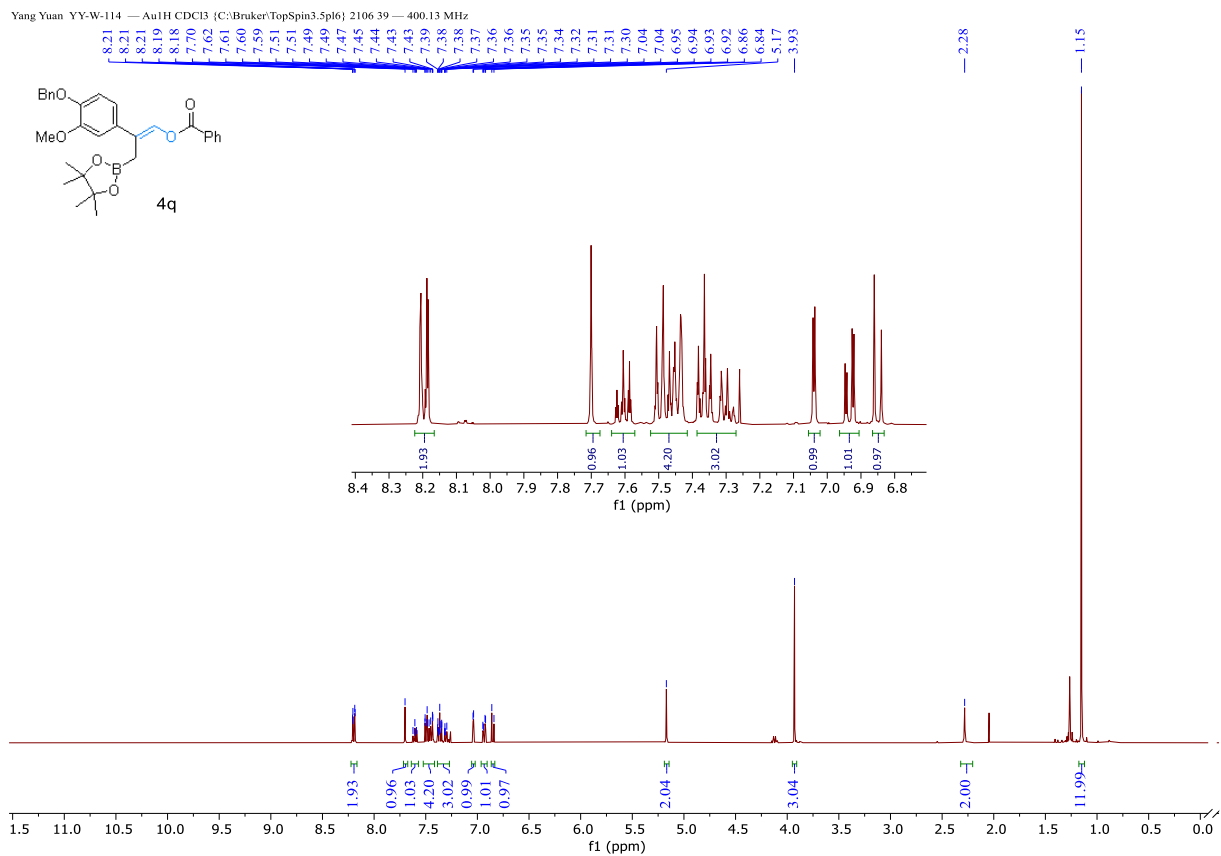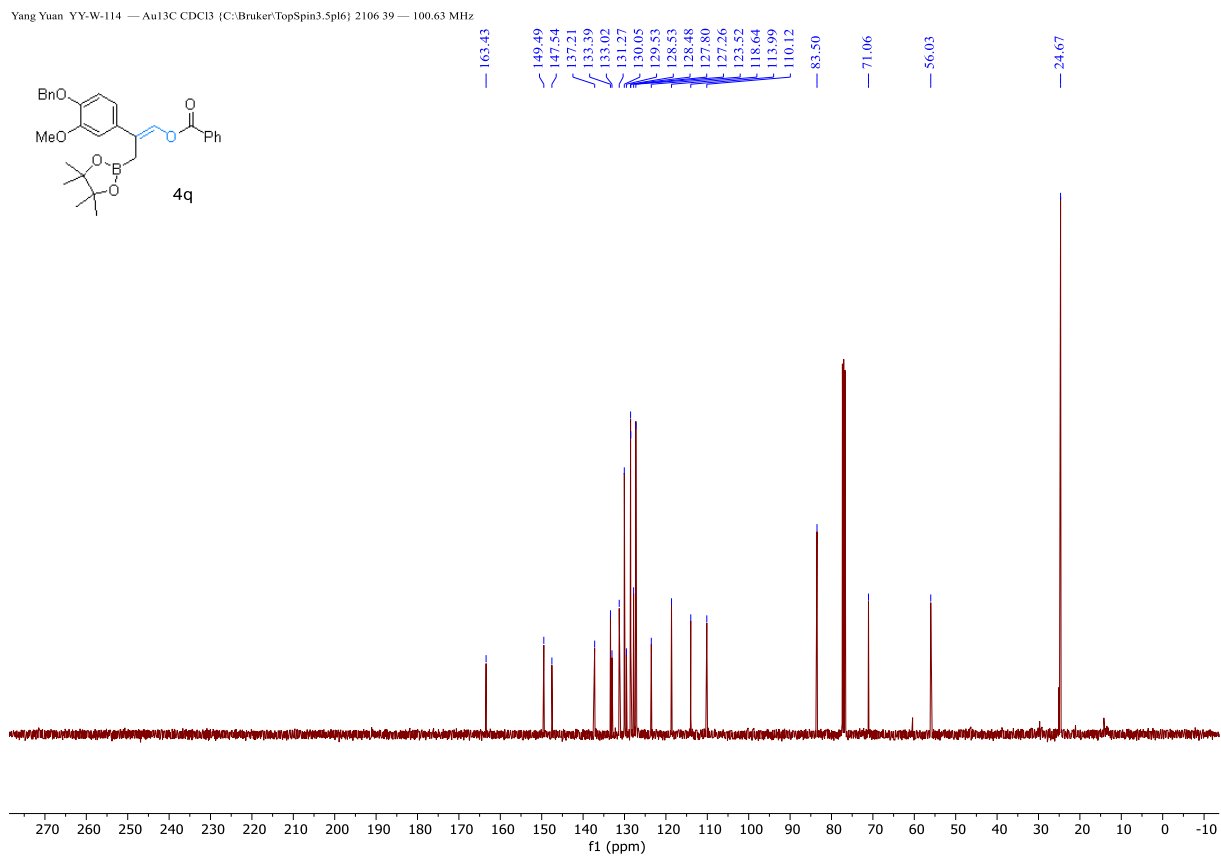

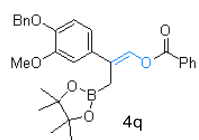

— 32.77

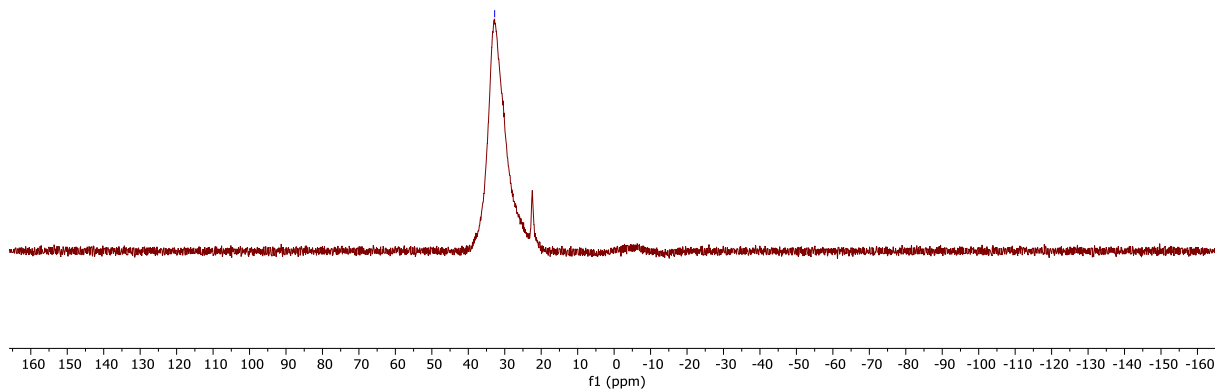

Yang Yuan YY-W-130 — Au1H CDC13 [C:\Bruker\TopSpin3.5\pl6] 2106 10 — 400.13 MHz

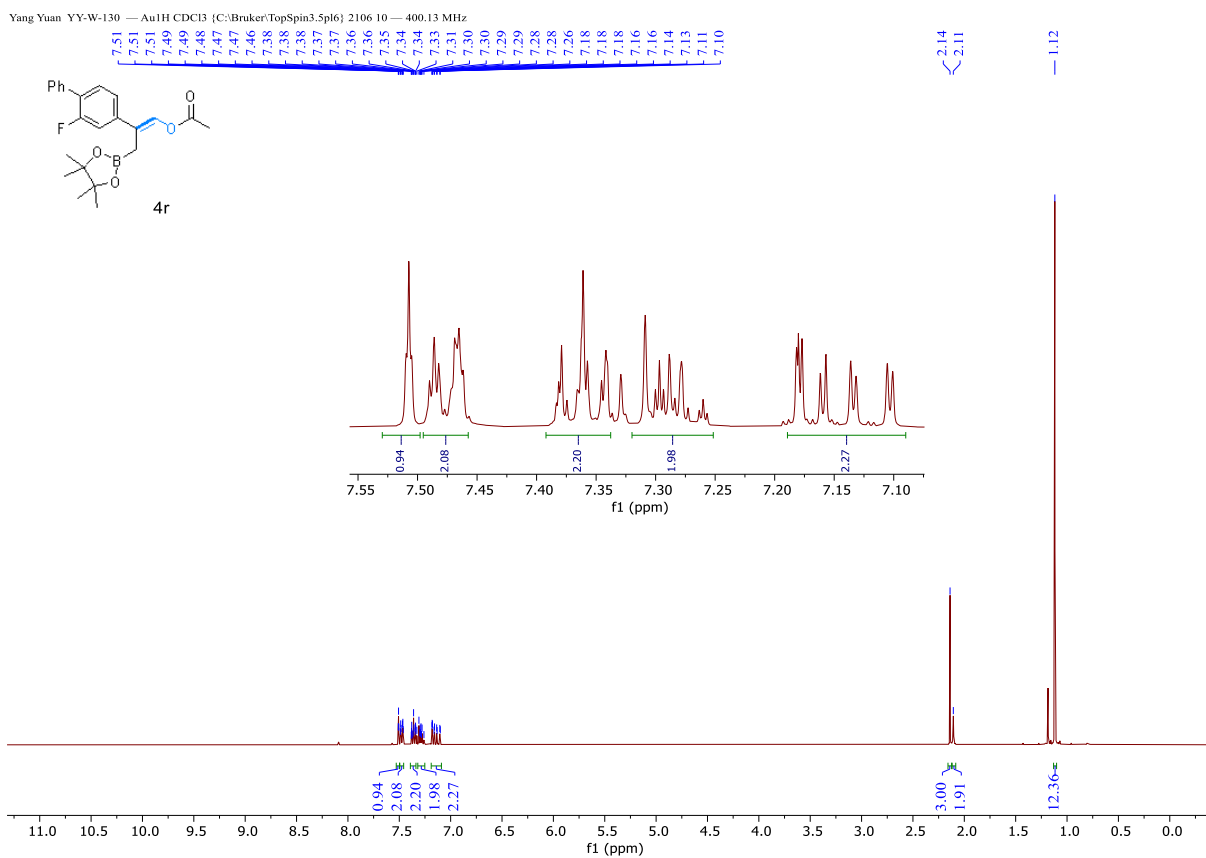

Yang Yuan YY-W-130 — Au13C CDC13 [C:\Bruker\TopSpin3.5\pl6] 2106 10 — 100.63 MHz

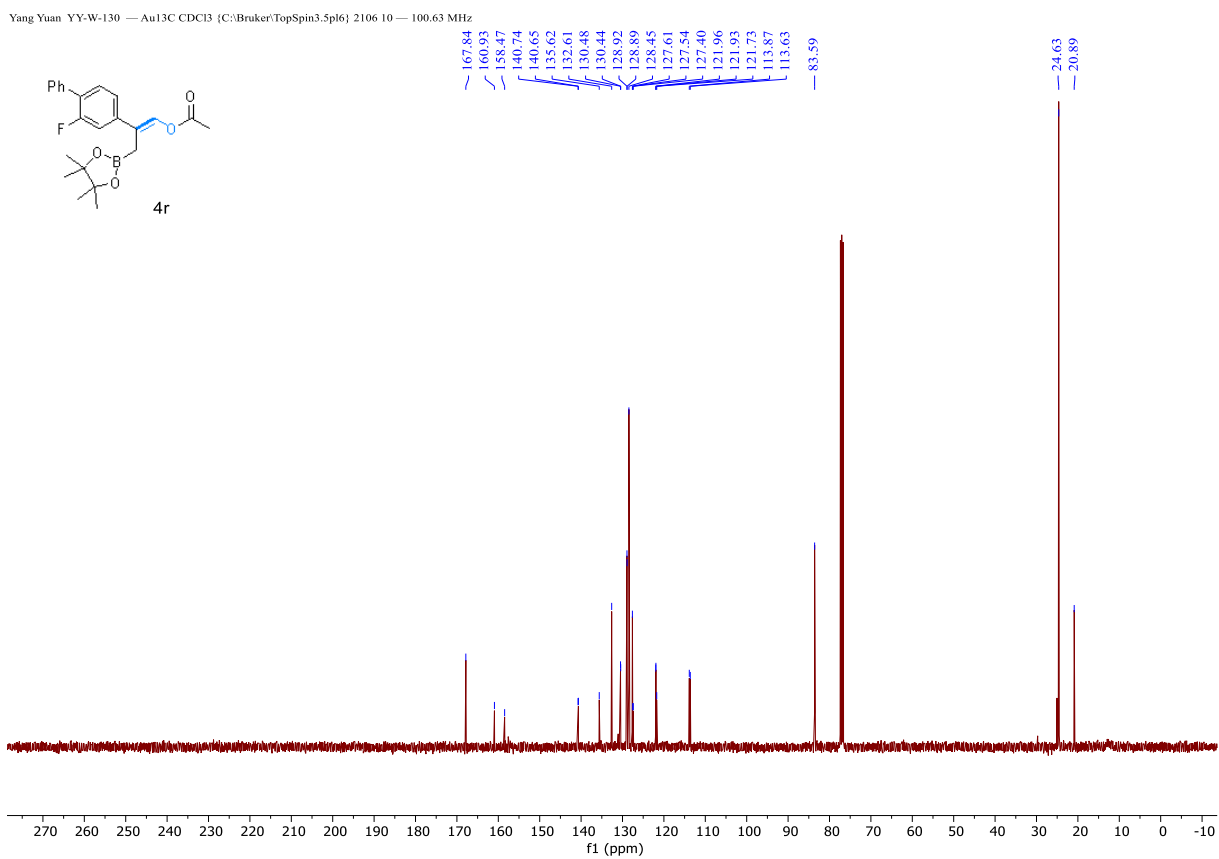

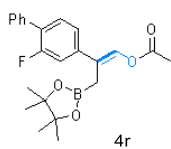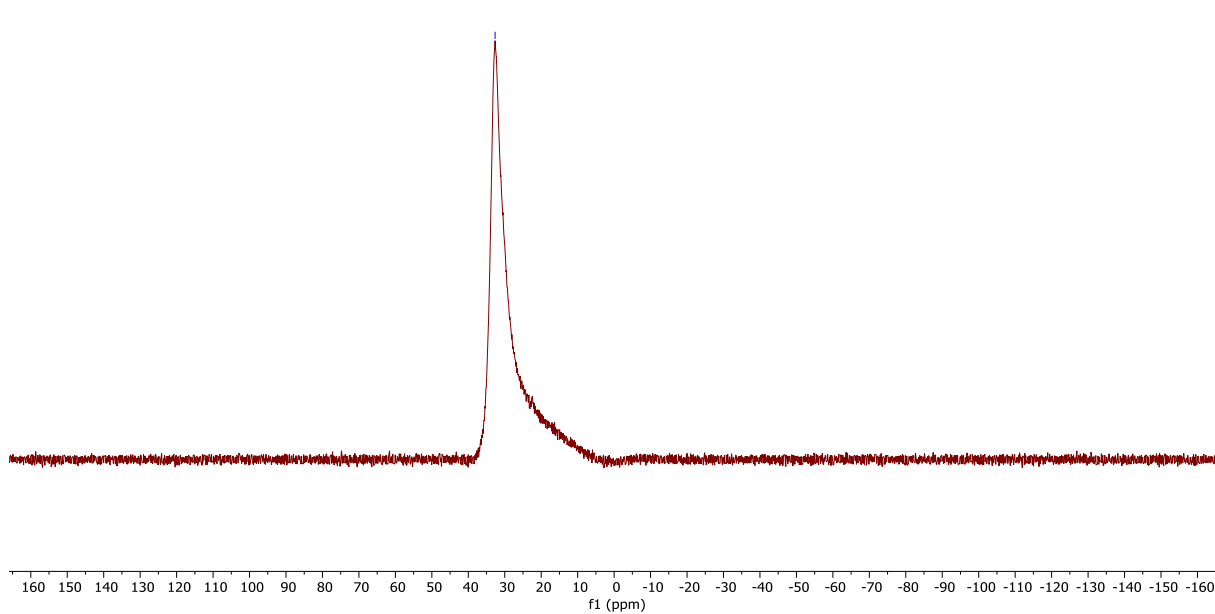



Yang Yuan YY-W-113 — Au1H CDC13 [C:\Bruker\TopSpin3.5\pl6] 2106 38 — 400.13 MHz

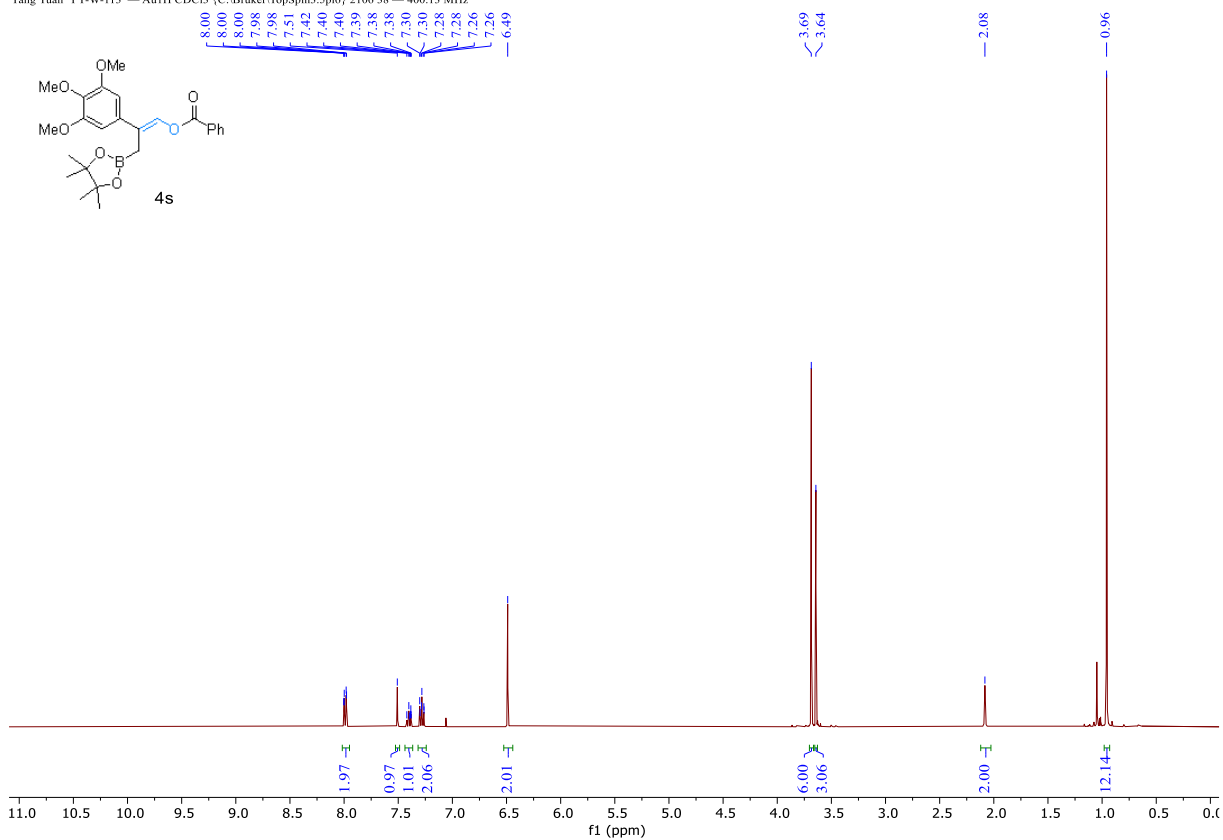

Yang Yuan YY-W-113 — Au13C CDC13 [C:\Bruker\TopSpin3.5\pl6] 2106 38 — 100.63 MHz

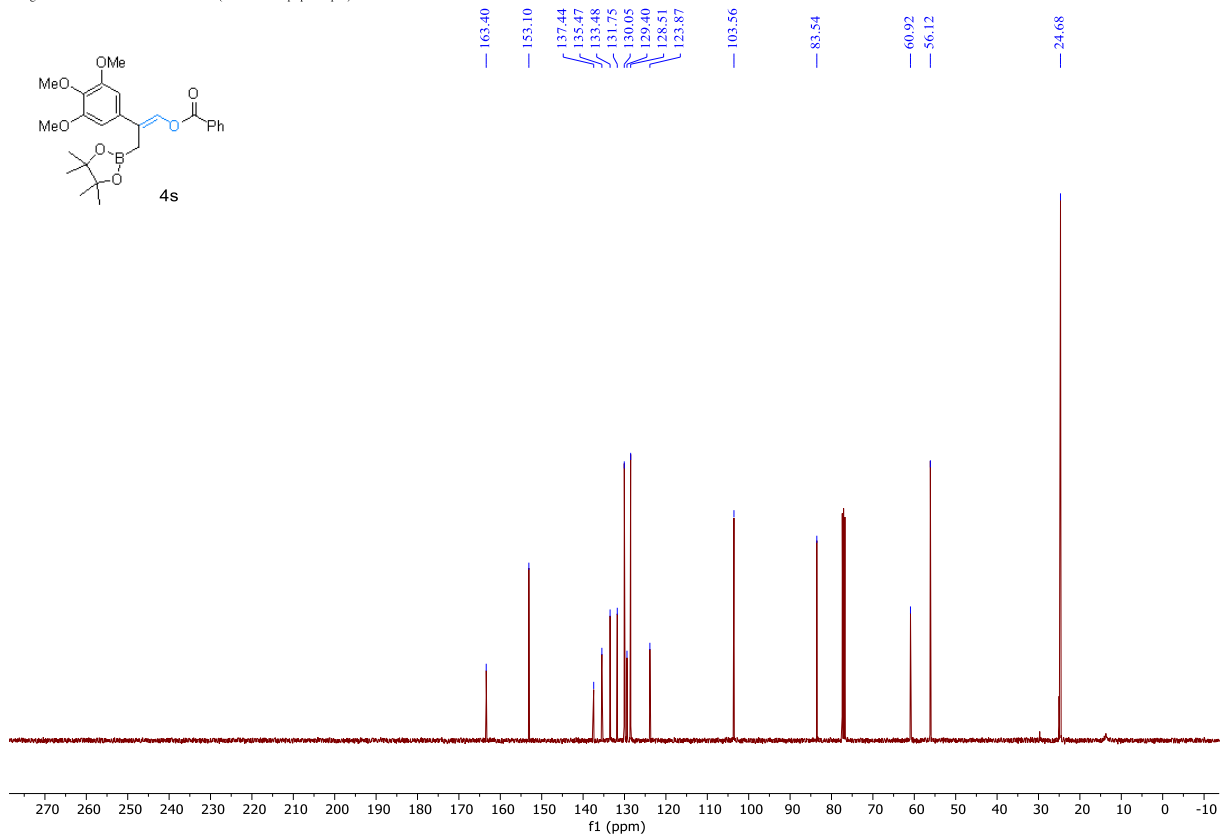

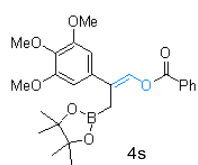

— 32.56

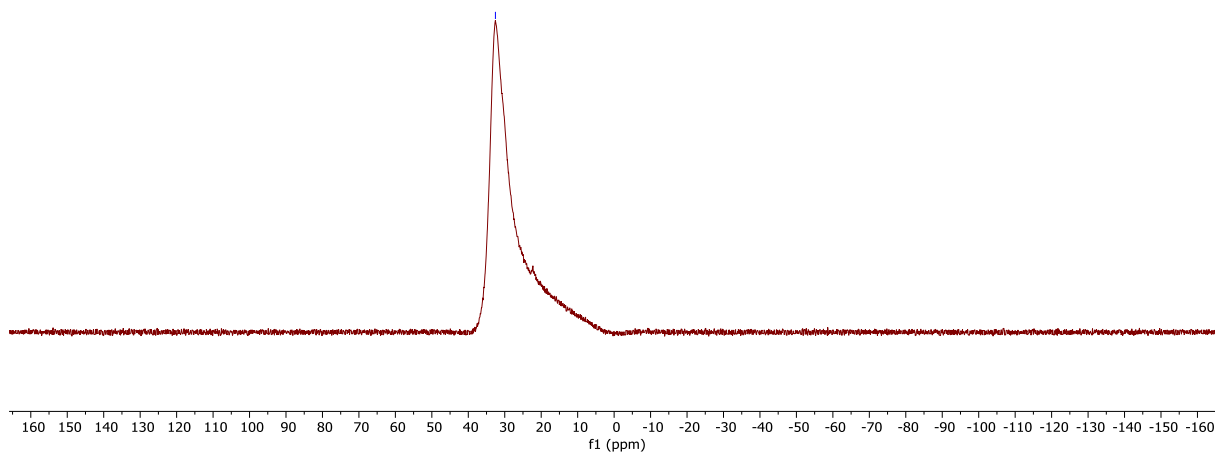

Yang Yuan YY-W-110 — Au1H CDC13 [C:\Bruker\TopSpin3.5\pl6] 2106 35 — 400.13 MHz

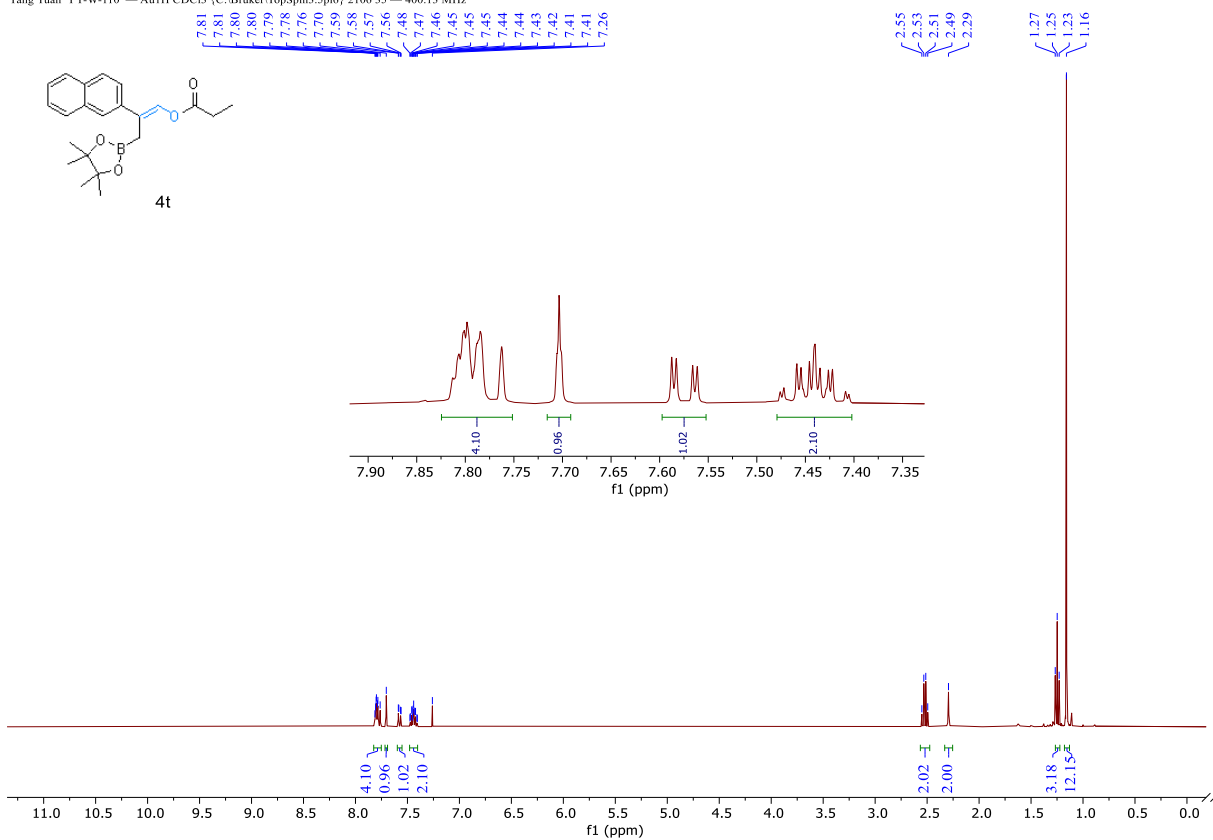

Yang Yuan YY-W-110 — Au13C CDC13 [C:\Bruker\TopSpin3.5\pl6] 2106 35 — 100.63 MHz

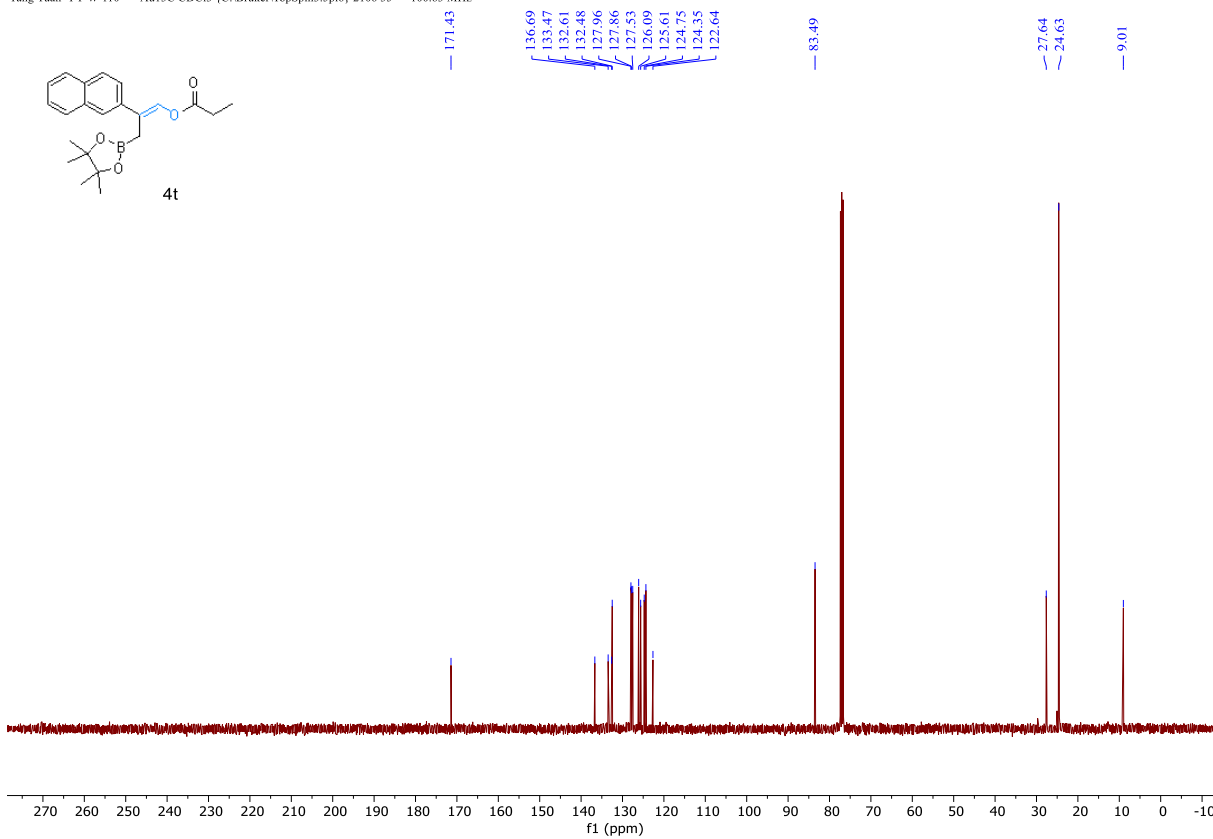

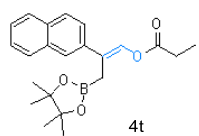

— 32.81

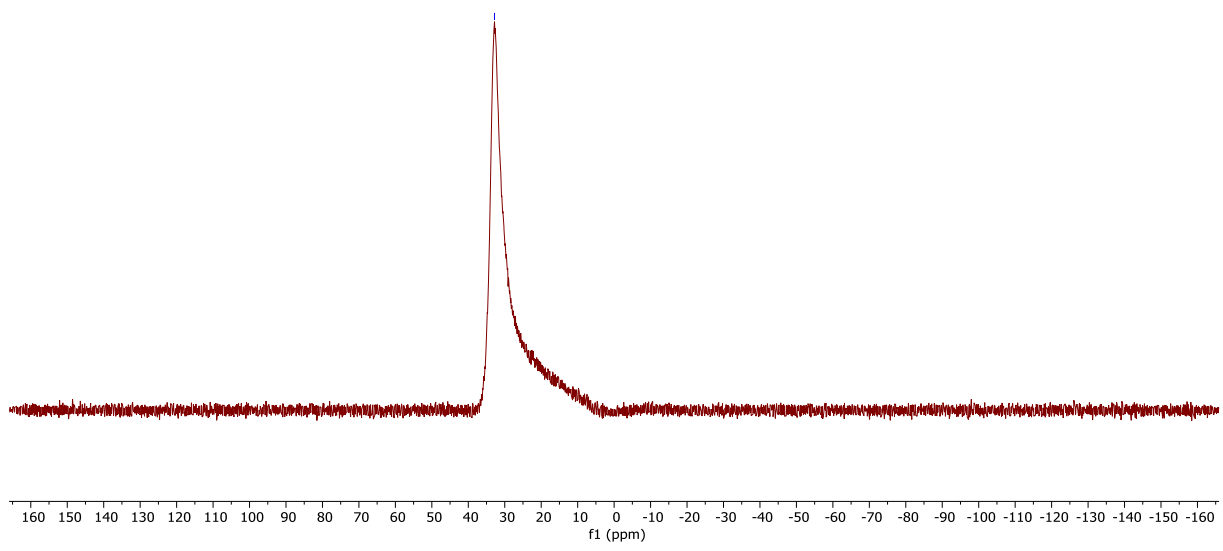

Yang Yuan YY-W-129 — Au1H CDCl3 [C:\Bruker\TopSpin3.5\pl6] 2106 9 — 400.13 MHz

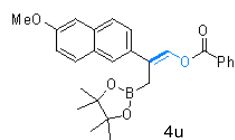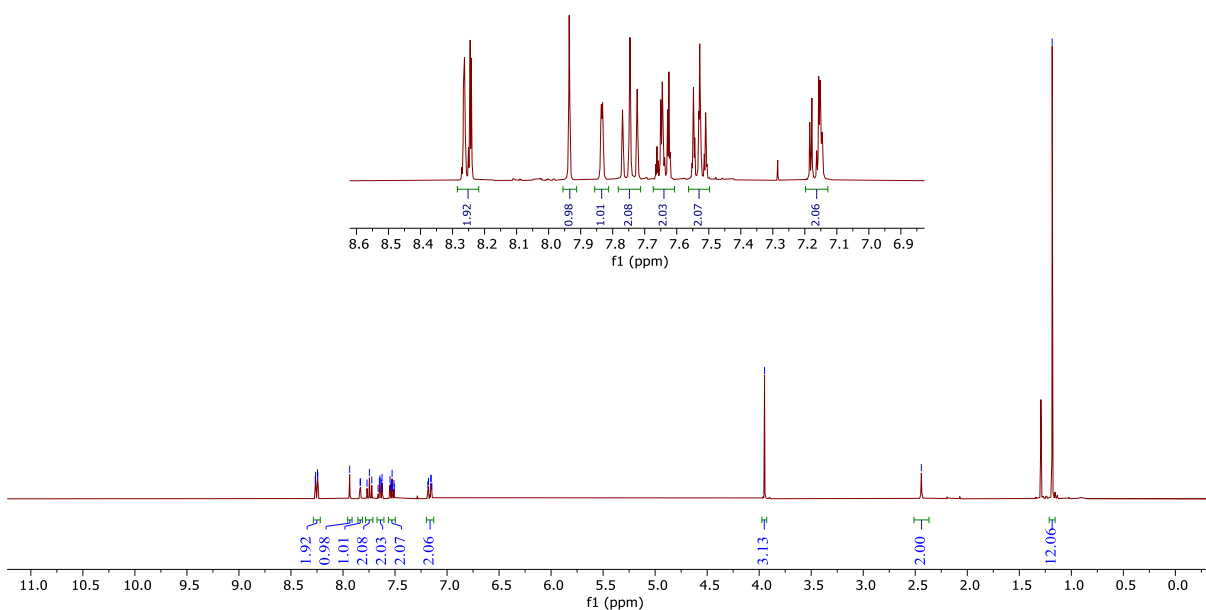

Yang Yuan YY-W-129 — Au13C CDCl3 [C:\Bruker\TopSpin3.5\pl6] 2106 9 — 100.63 MHz

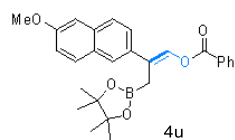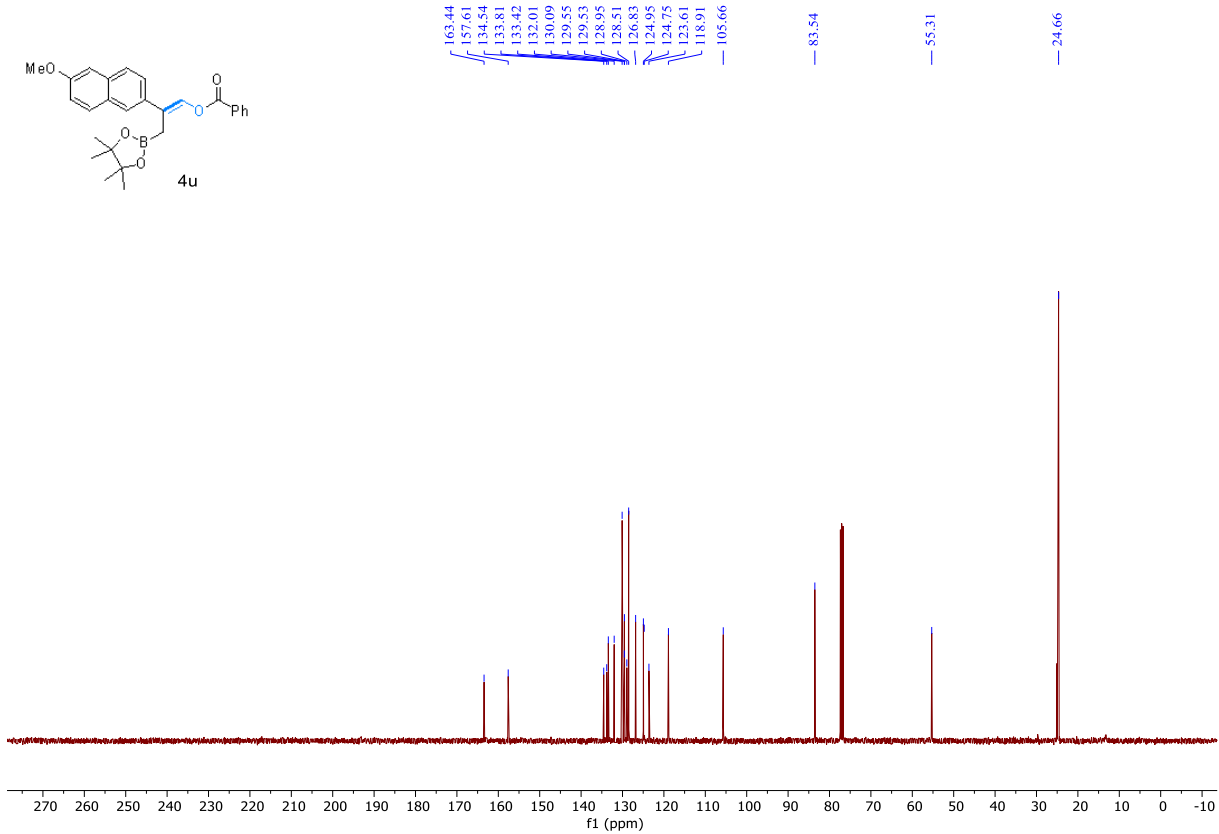

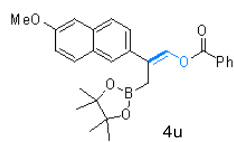

32.69

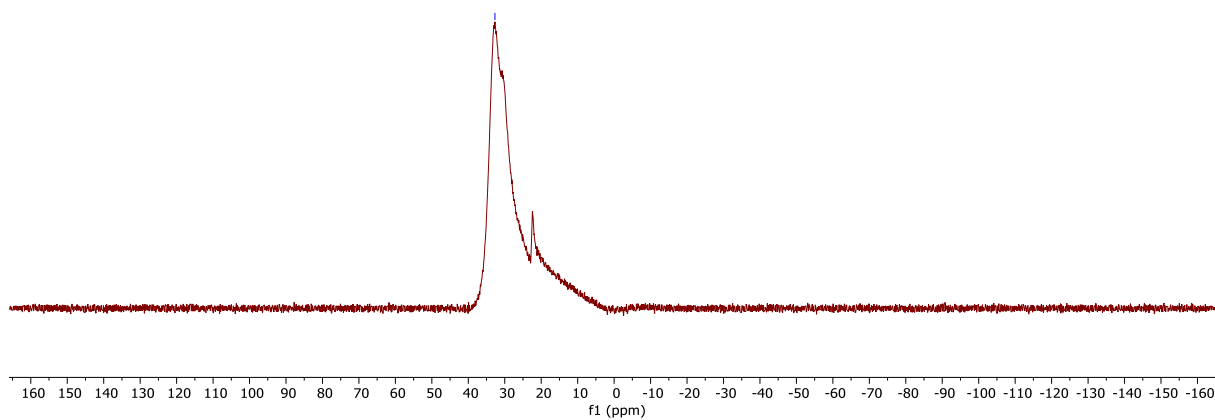

Yang Yuan YY-W-126 — Au1H CDC13 {C:\Bruker\TopSpin3.5\pl6} 2106 7 — 400.13 MHz

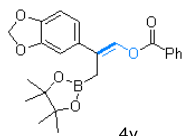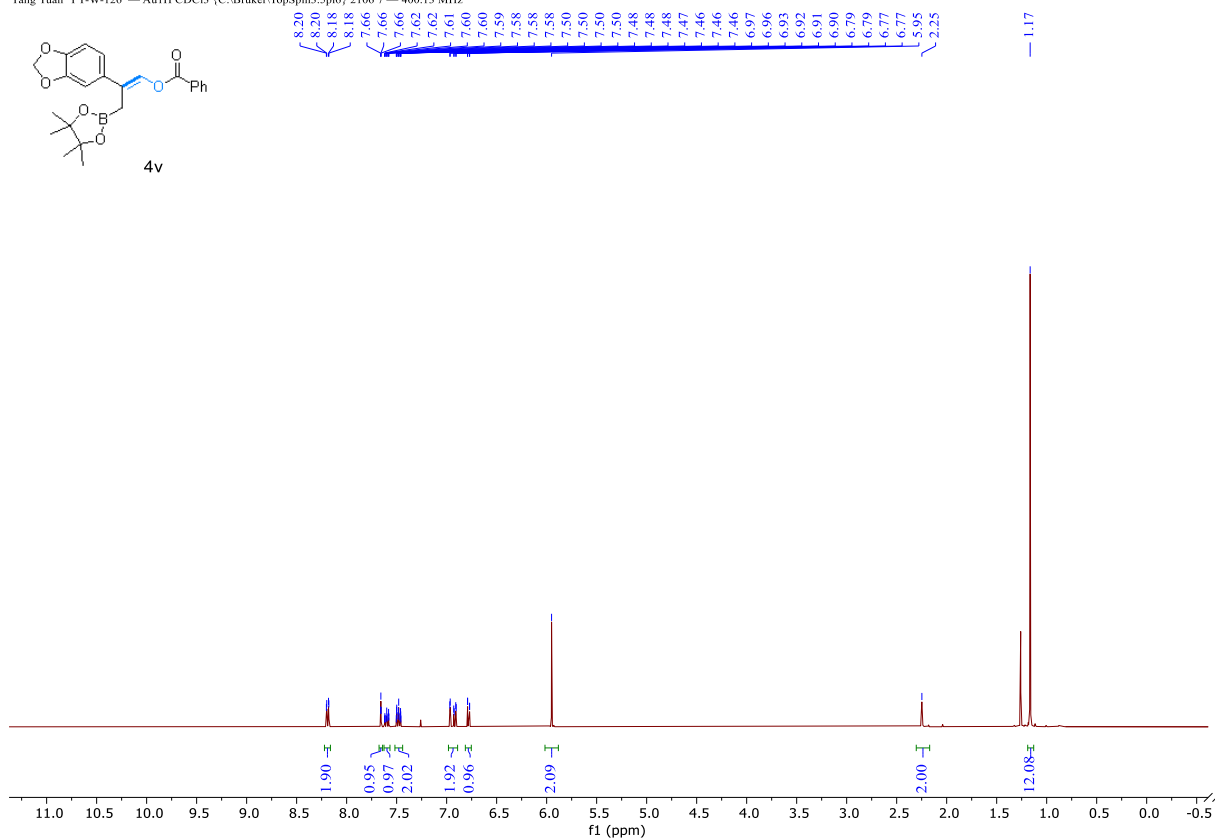

Yang Yuan YY-W-126 — Au13C CDC13 {C:\Bruker\TopSpin3.5\pl6} 2106 7 — 100.63 MHz

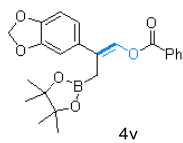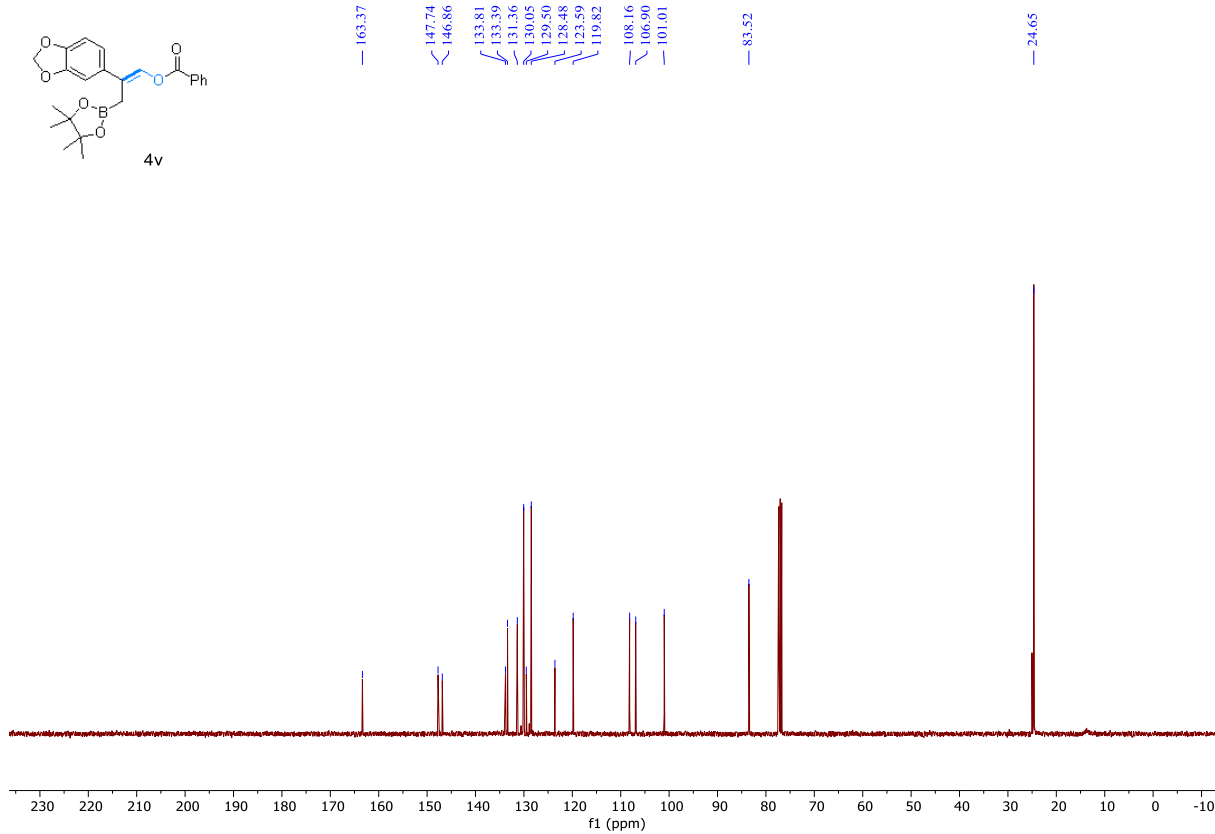

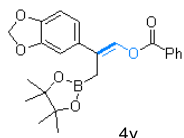

— 33.23

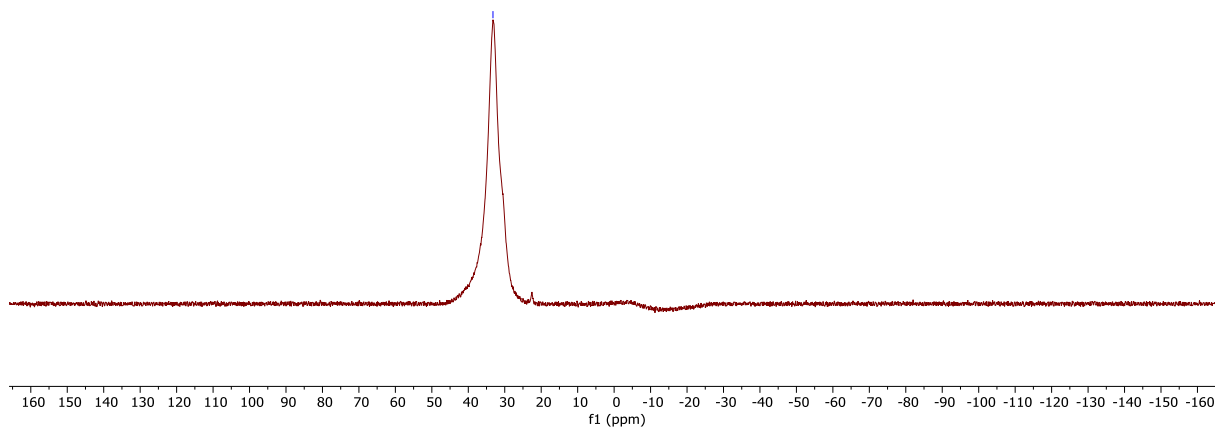



Yang Yuan YY-W-115 — Au1H CDC13 [C:\Bruker\TopSpin3.5\pl6] 2106 2 — 400.13 MHz

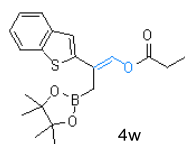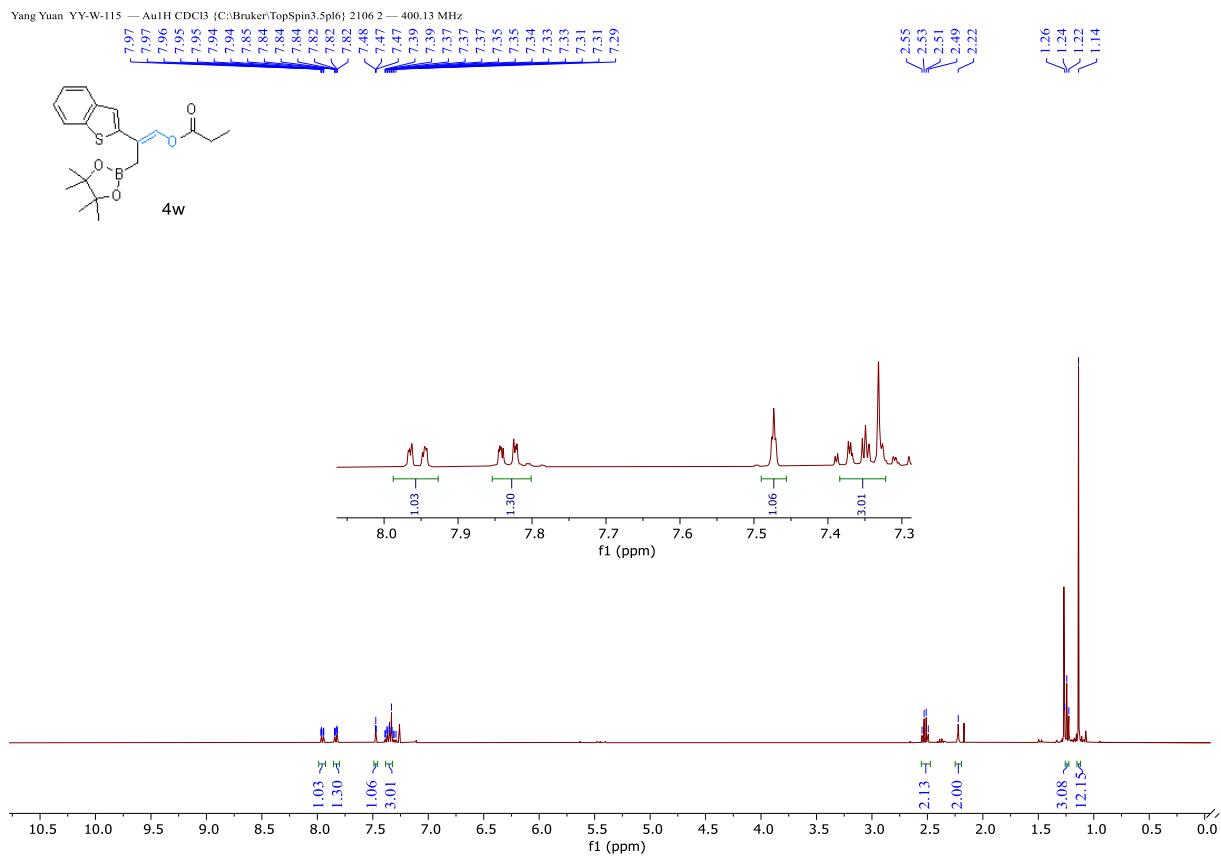

Yang Yuan YY-W-115 — Au13C CDC13 [C:\Bruker\TopSpin3.5\pl6] 2106 2 — 100.63 MHz

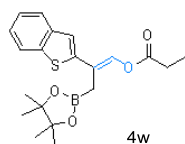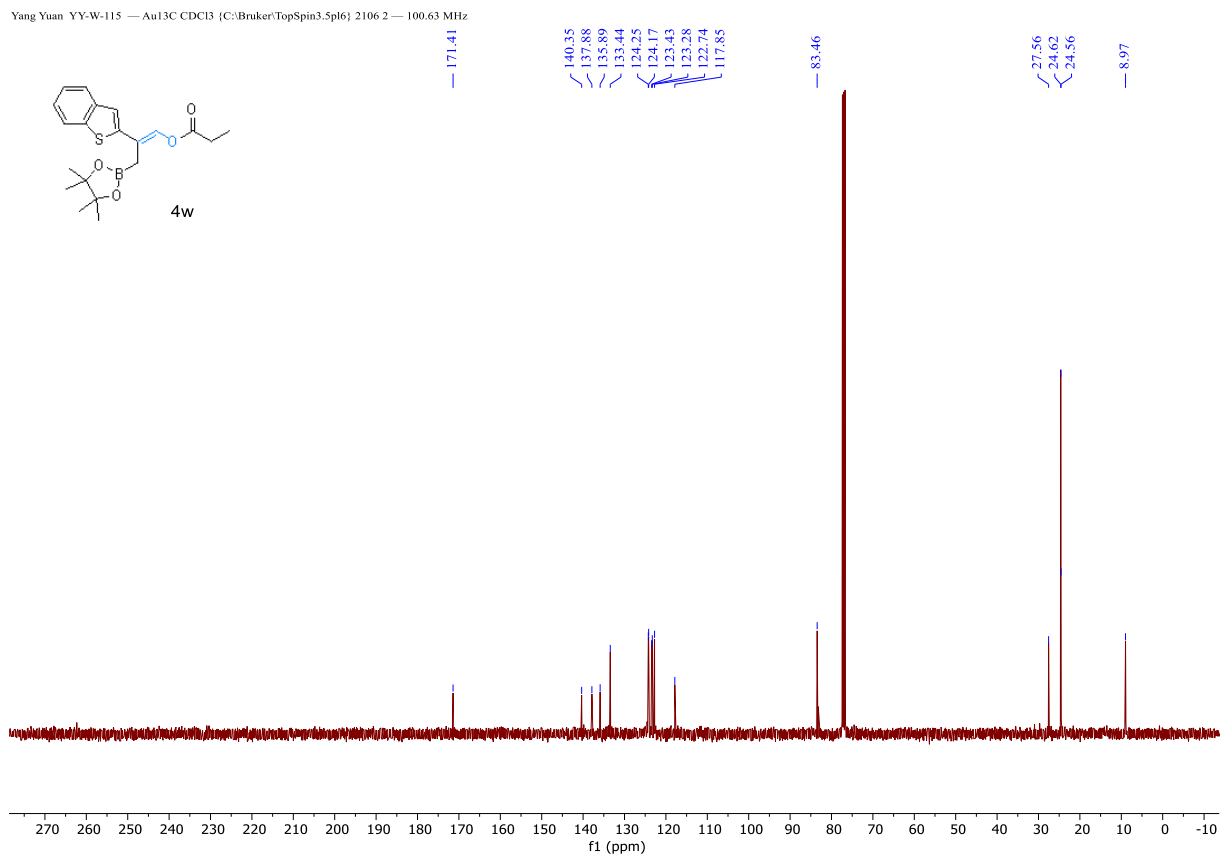

Yang Yuan YY-W-139 — PROTON CDC13 (C:\Bruker\TopSpin3.6.2) 2106 53 — 300.20 MHz

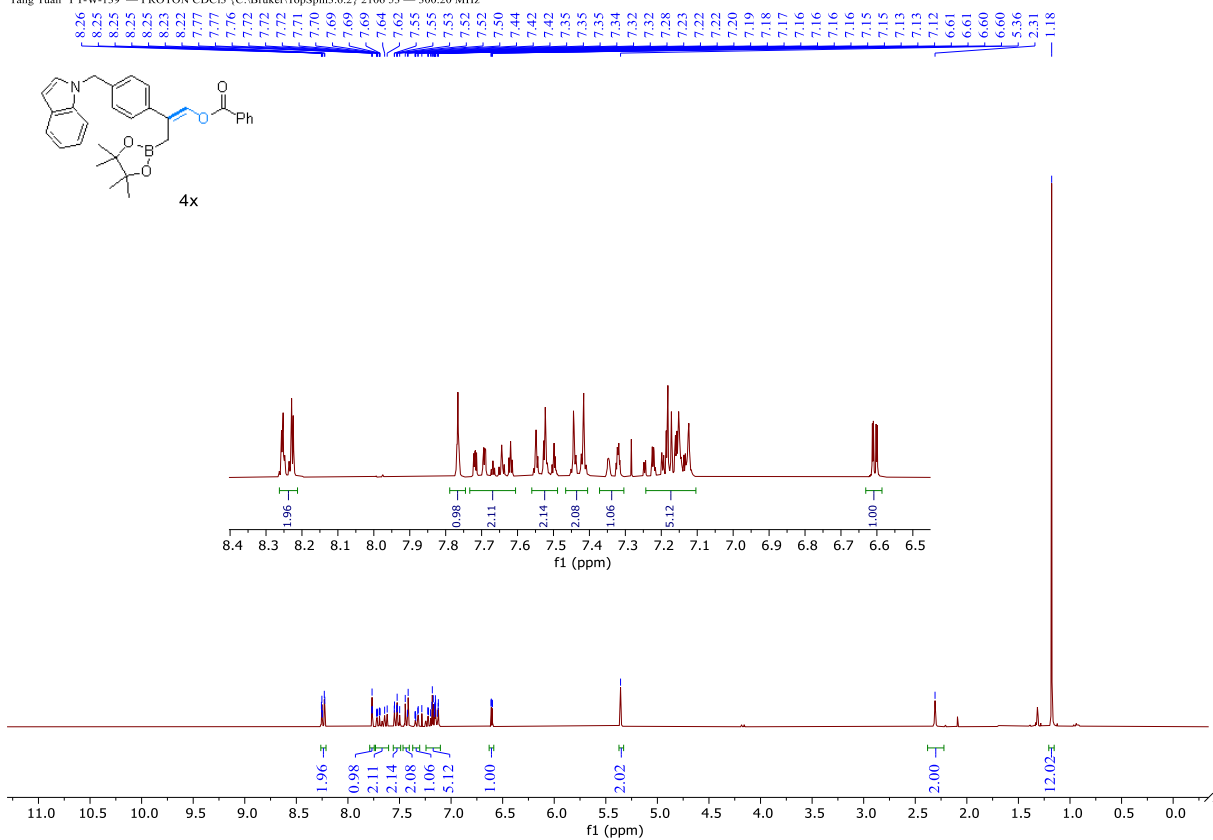

Yang Yuan YY-W-139 — C13CPD CDC13 (C:\Bruker\TopSpin3.6.2) 2106 53 — 75.49 MHz

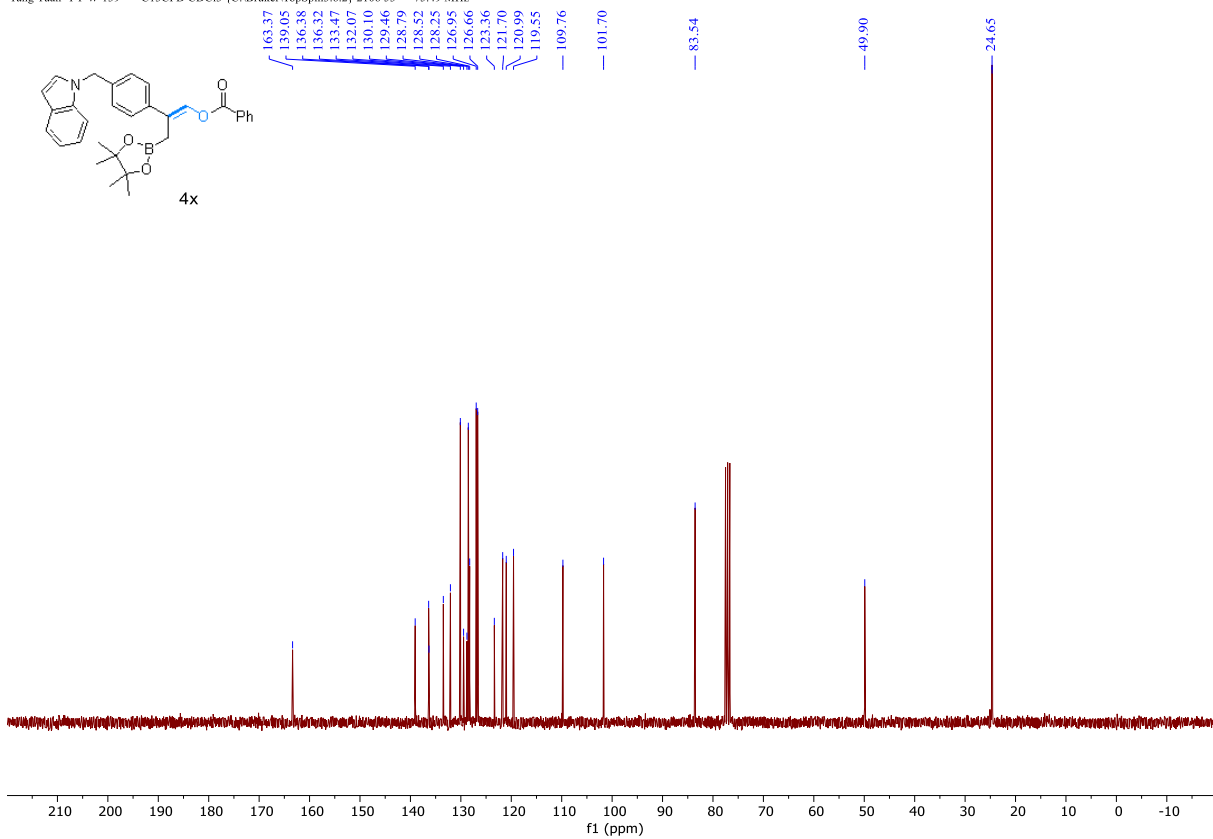

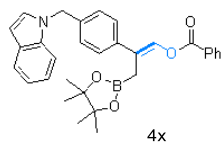

— 32.35

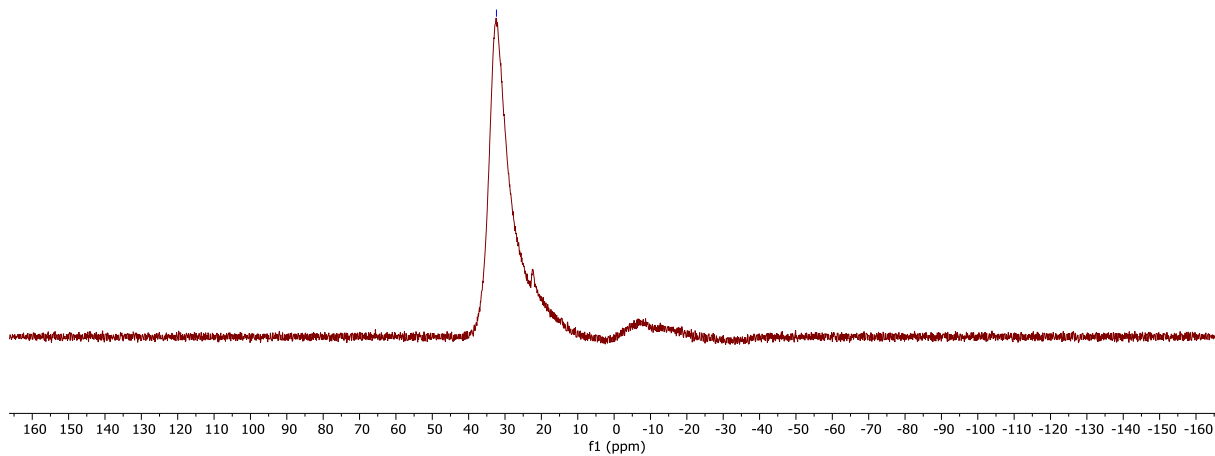

Yuan/YY-w-125 — PROTON CDC13 (C:\Bruker\TopSpin3.6.2) 2106 41 — 300.20 MHz

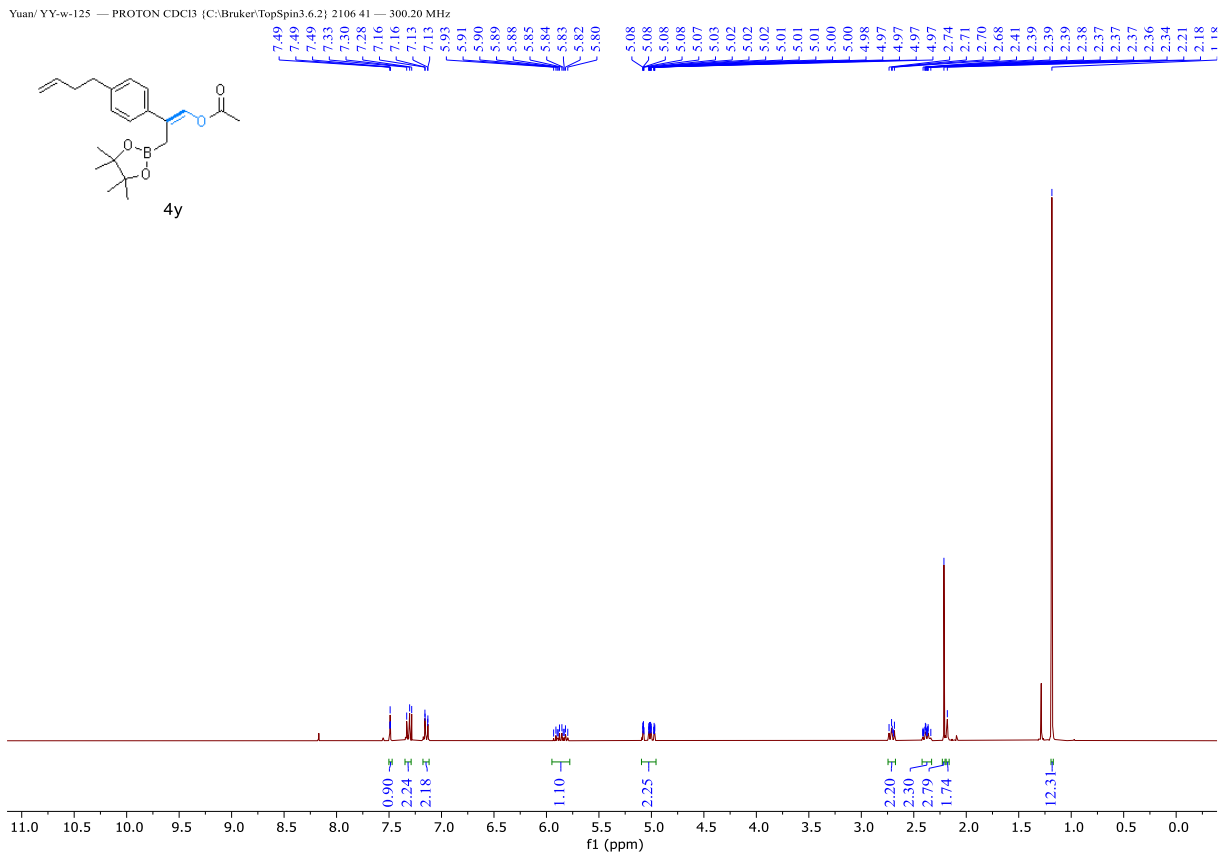

Yuan/YY-w-125 — C13CPD CDC13 (C:\Bruker\TopSpin3.6.2) 2106 41 — 75.49 MHz

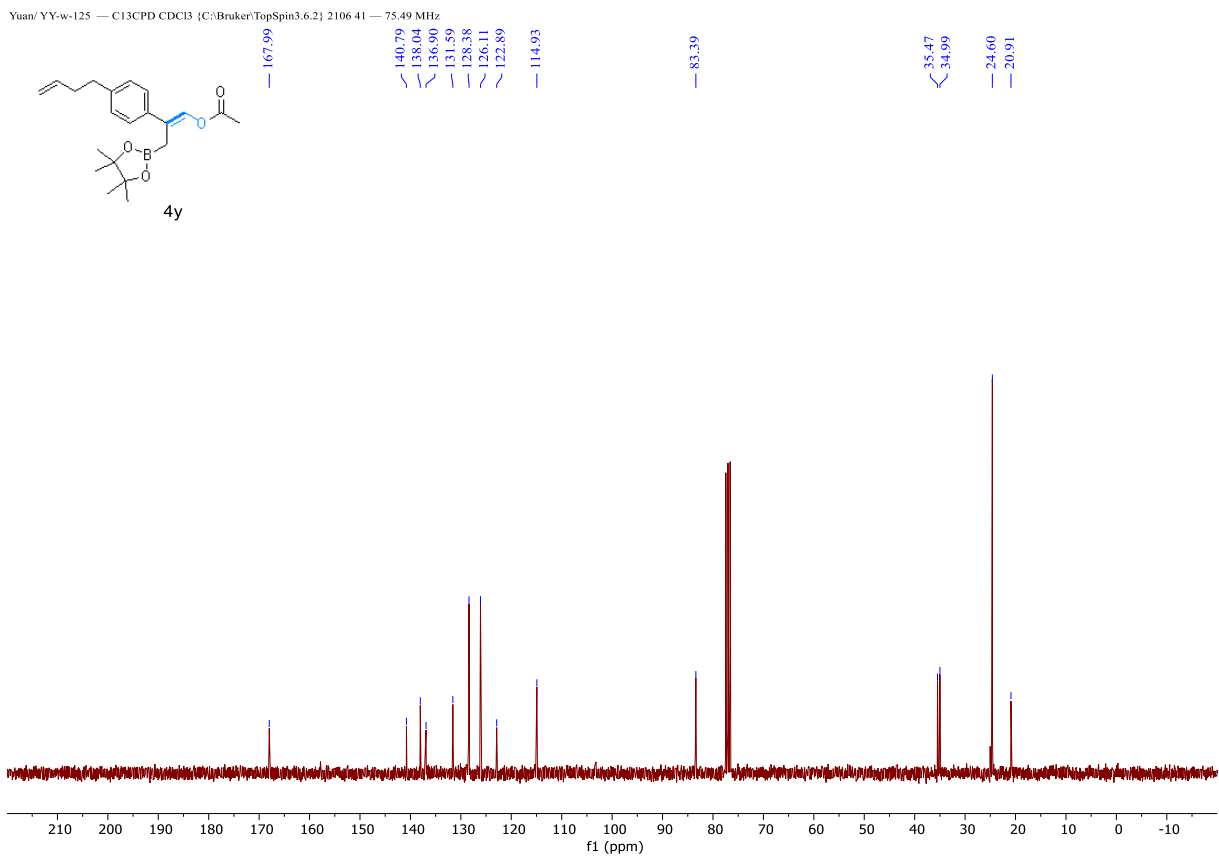

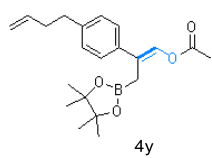

— 32.67

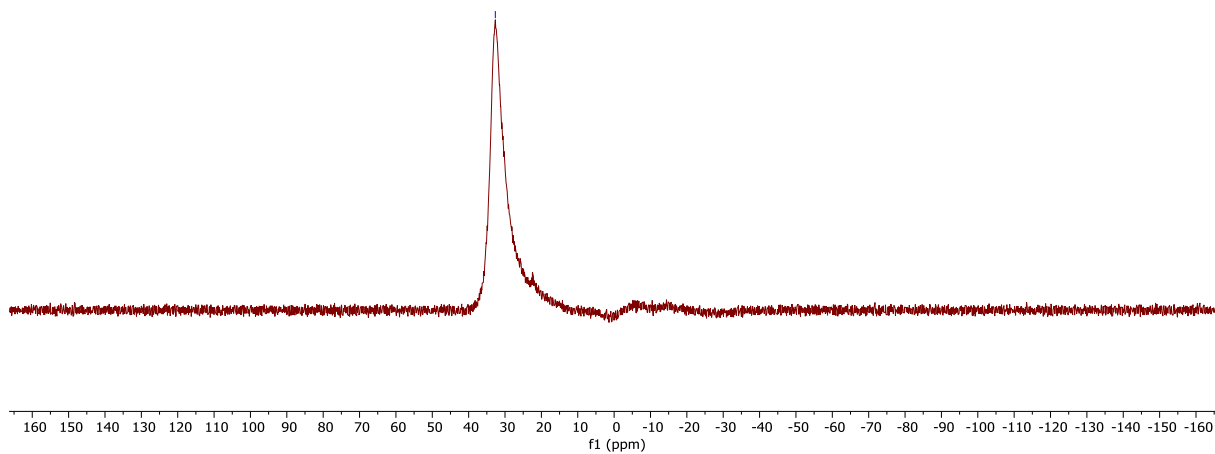

Yuan/YY-W-146 — PROTON CDCl3 (C:\Bruker\TopSpin3.6.2) 2106 3 — 300.20 MHz

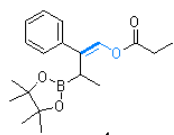

7.40  
7.39  
7.39  
7.38  
7.38  
7.37  
7.37  
7.35  
7.34  
7.33  
7.33  
7.32  
7.31  
7.31  
7.30  
7.29  
7.29  
7.28  
7.28  
7.27  
7.25

2.58  
2.56  
2.55  
2.54  
2.53  
2.52  
2.51  
2.50  
2.49  
2.47  
1.28  
1.26  
1.25  
1.23  
1.22

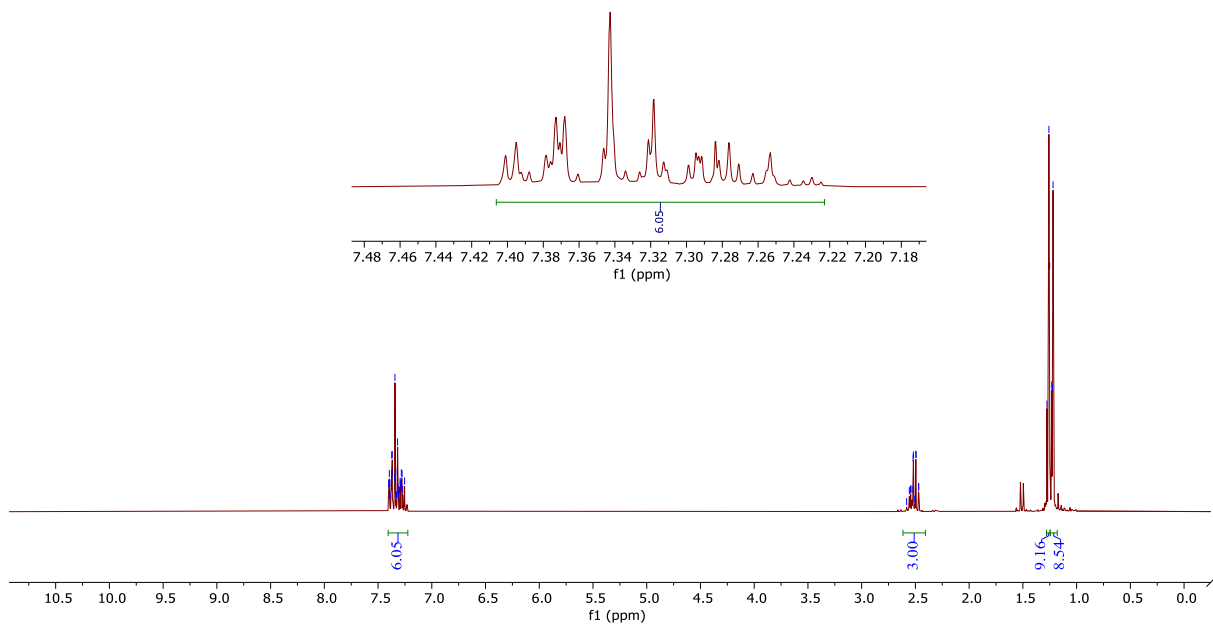

Yuan/YY-W-146 — C13CPD CDCl3 (C:\Bruker\TopSpin3.6.2) 2106 3 — 75.49 MHz

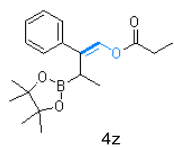

171.31  
139.42  
132.33  
129.50  
128.18  
127.19  
126.95  
83.35  
27.61  
24.87  
24.60  
14.53  
8.97

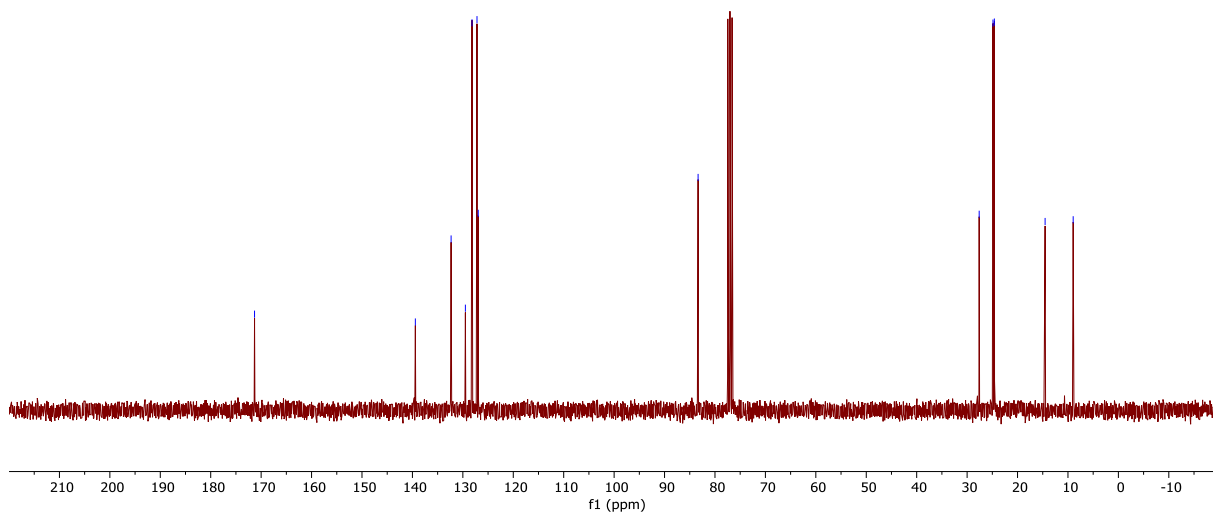



Yang Yuan YY-W-123 — Au1H CDCl3 (C:\Bruker\TopSpin3.6.2) 2106 4 — 300.13 MHz

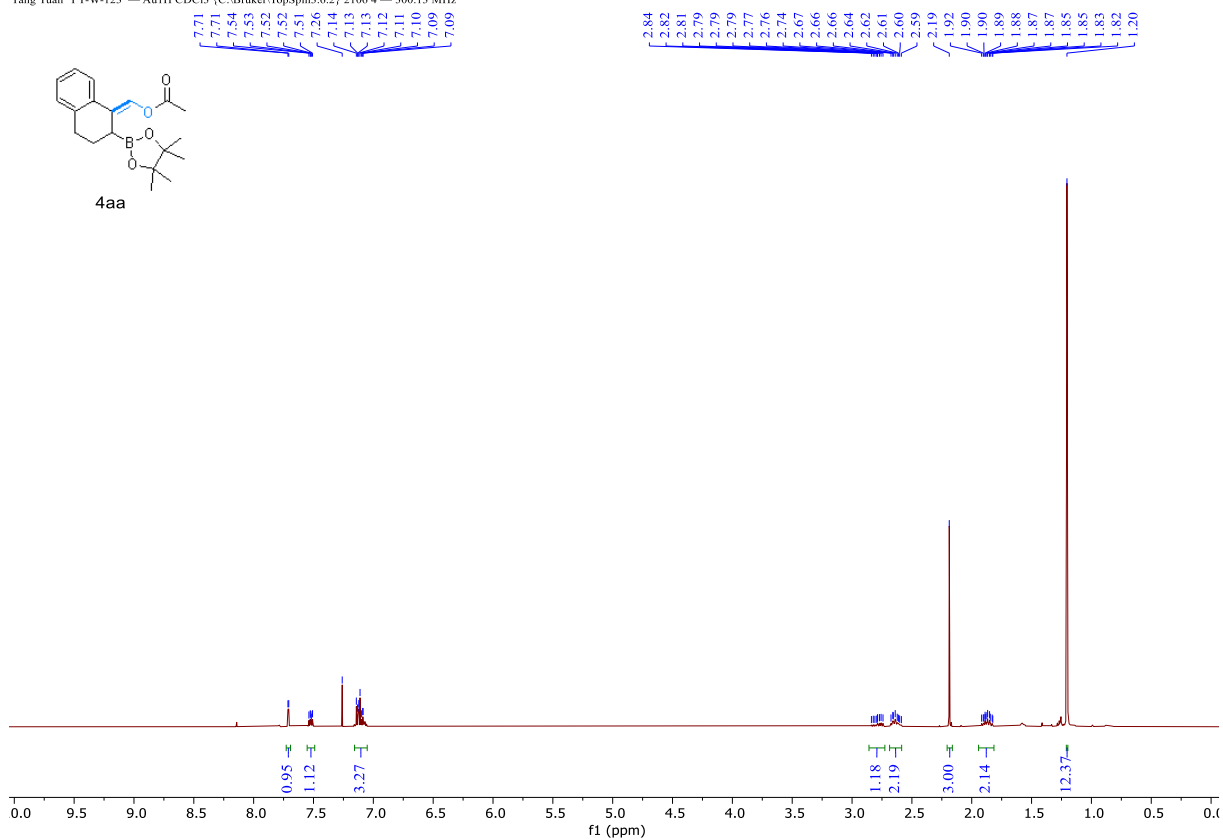

Yang Yuan YY-W-123 — Au13C CDCl3 (C:\Bruker\TopSpin3.6.2) 2106 4 — 75.48 MHz

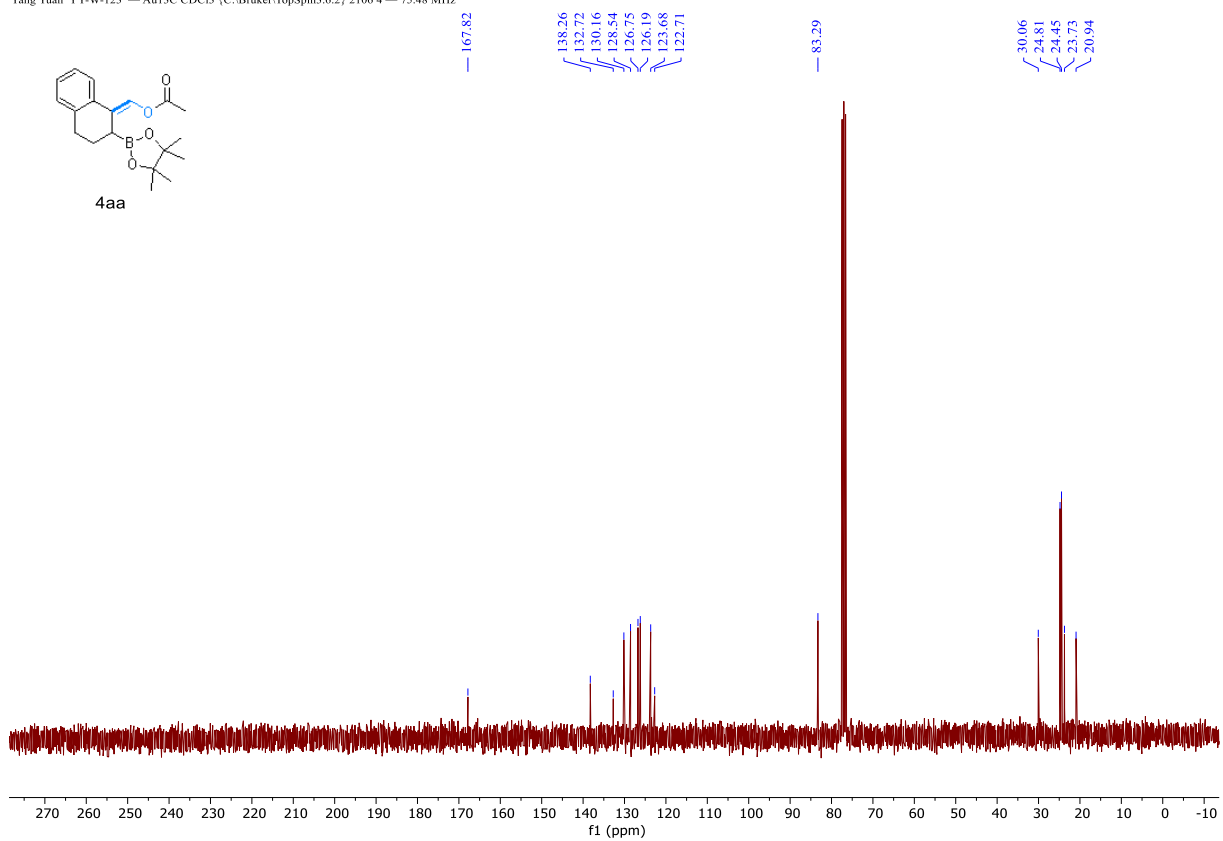



Yuan/YY-w-134 — PROTON CDCl3 (C:\Bruker\TopSpin3.6.2) 2106 42 — 300.20 MHz

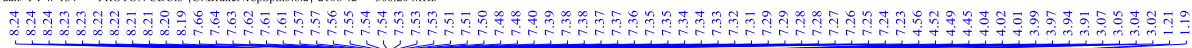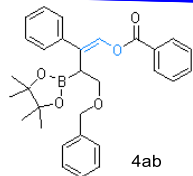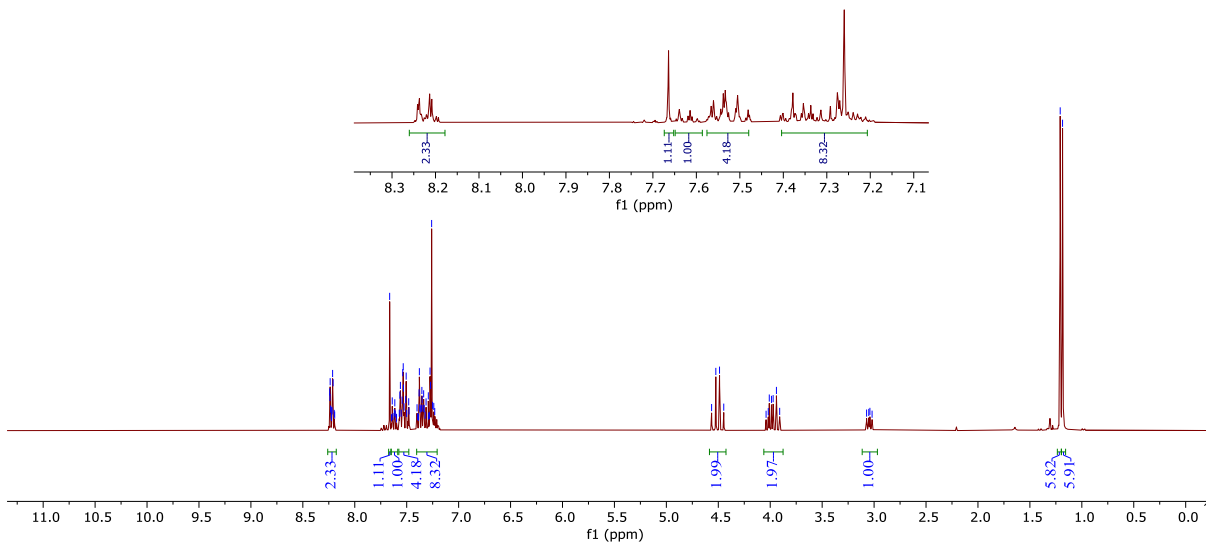

Yuan/YY-w-134 — C13CPD CDCl3 (C:\Bruker\TopSpin3.6.2) 2106 42 — 75.49 MHz

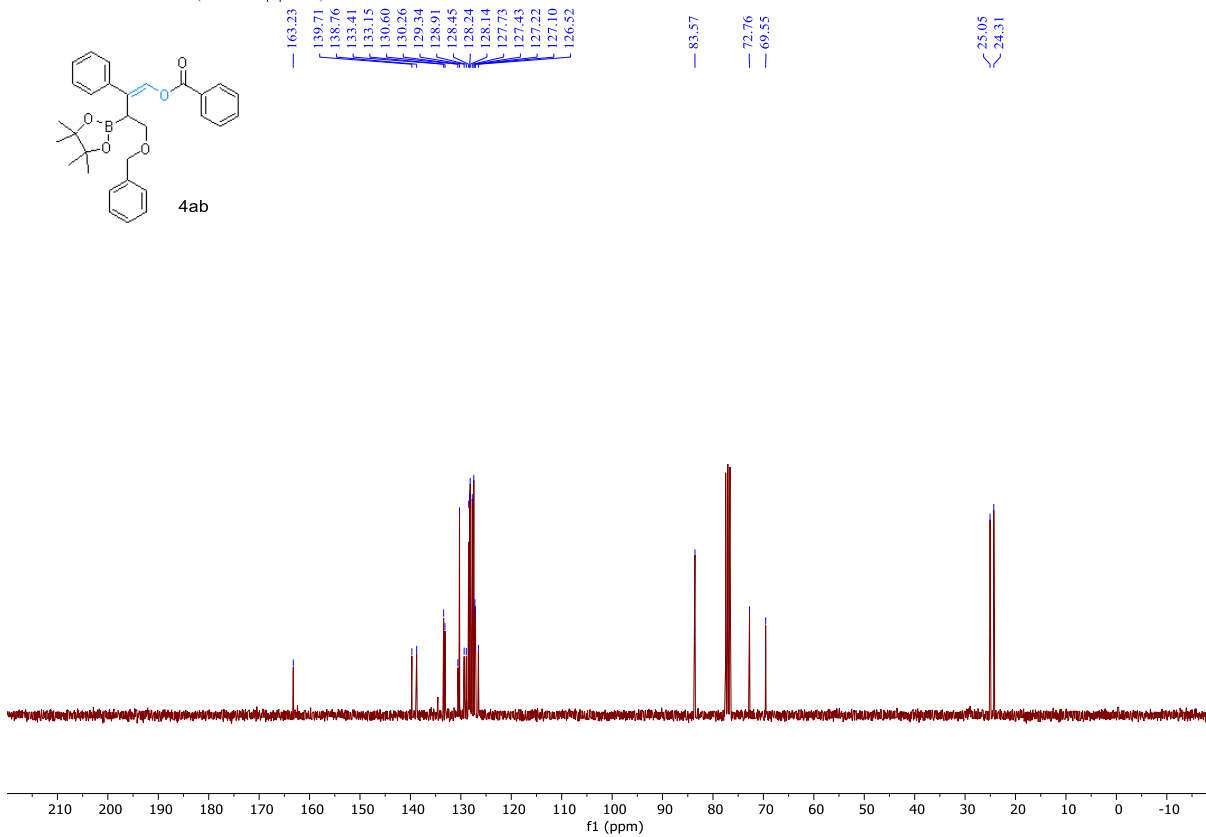

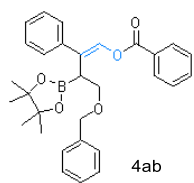

— 32.02

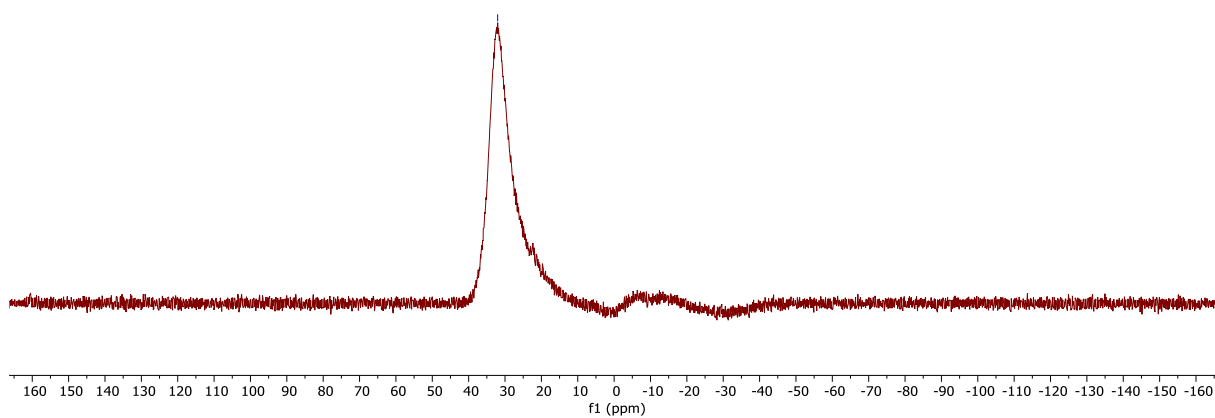

Yuan/YY-w-140 — PROTON CDCl3 (C:\Bruker\TopSpin3.6.2) 2106 36 — 300.20 MHz

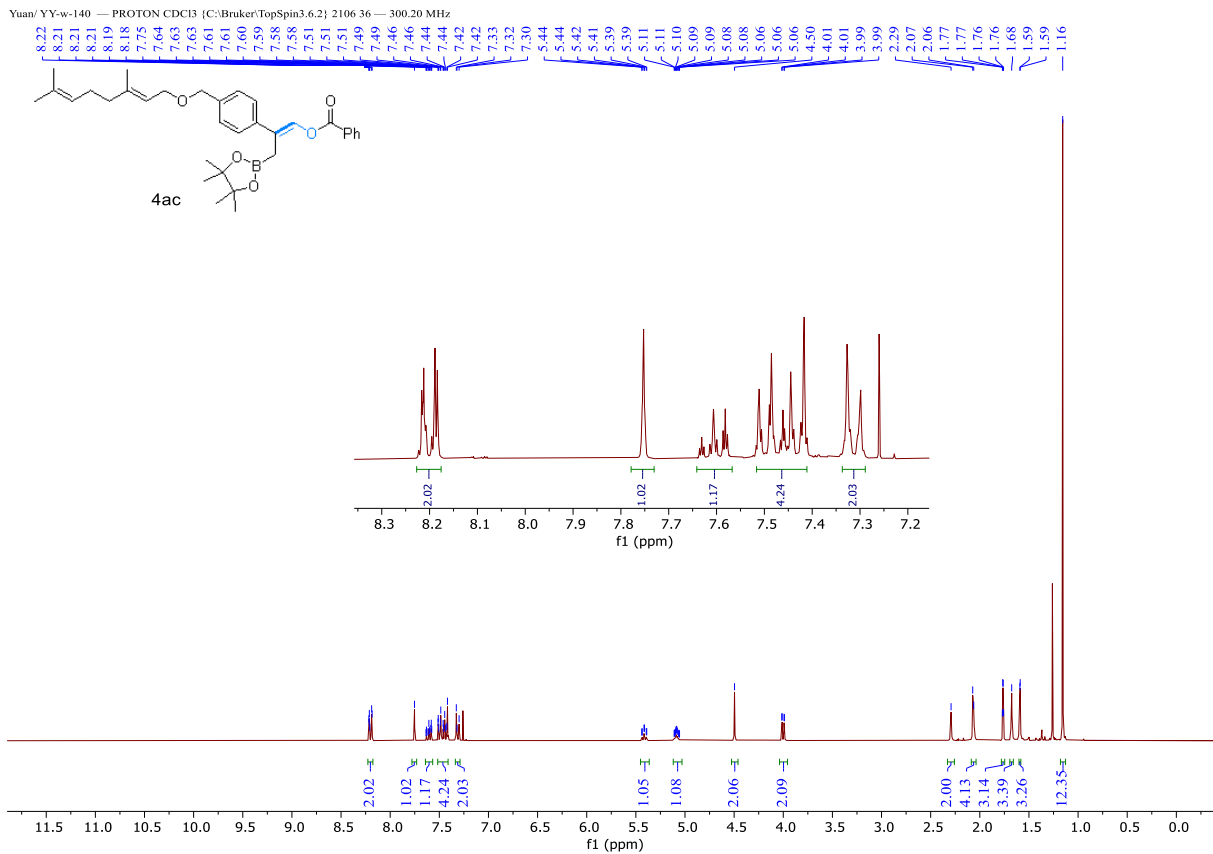

Yuan/YY-w-140 — C13CPD CDCl3 (C:\Bruker\TopSpin3.6.2) 2106 36 — 75.49 MHz

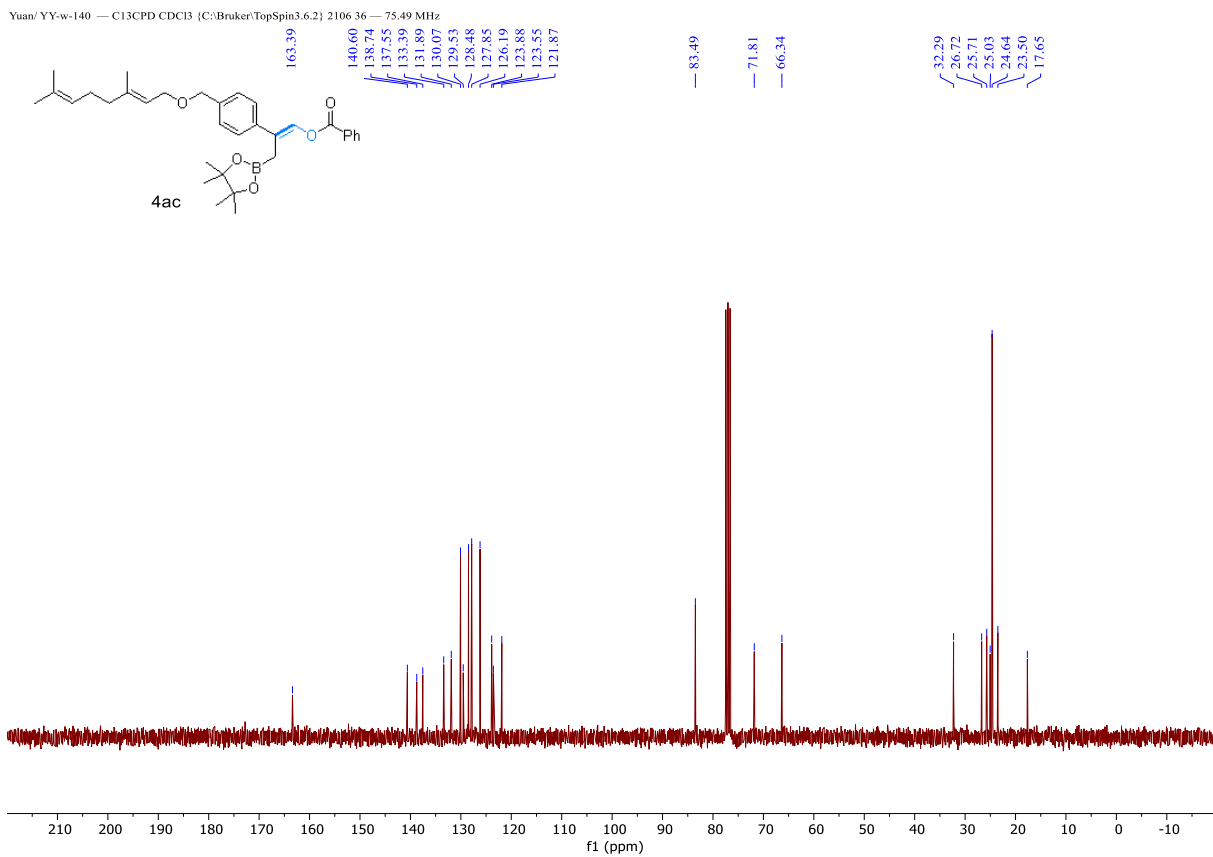

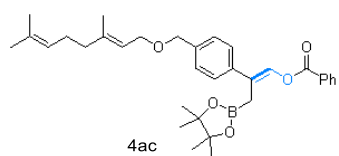

30.15

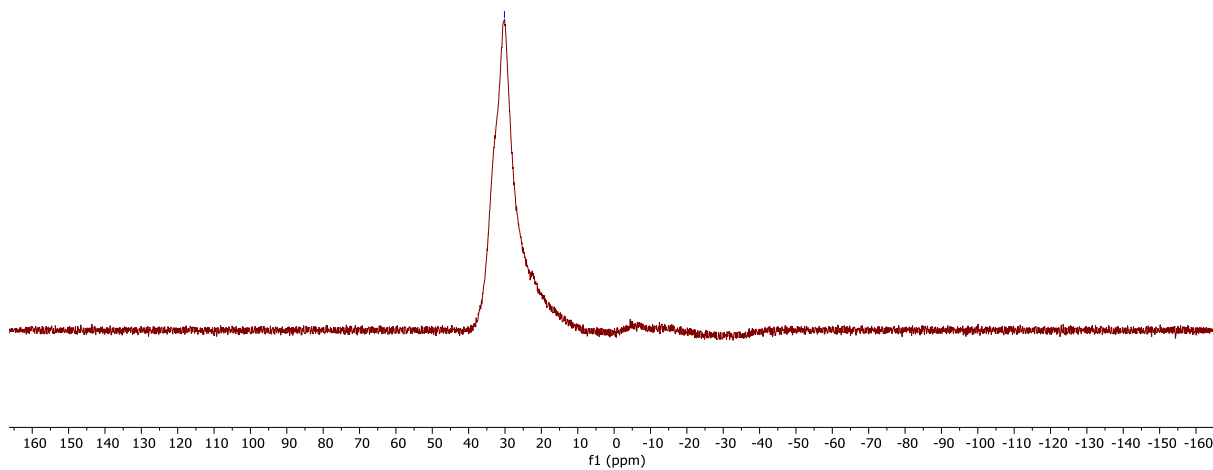

Yang Yuan YY-W-138 — PROTON CDC13 (C:\Bruker\TopSpin3.6.2) 2106 11 — 300.20 MHz

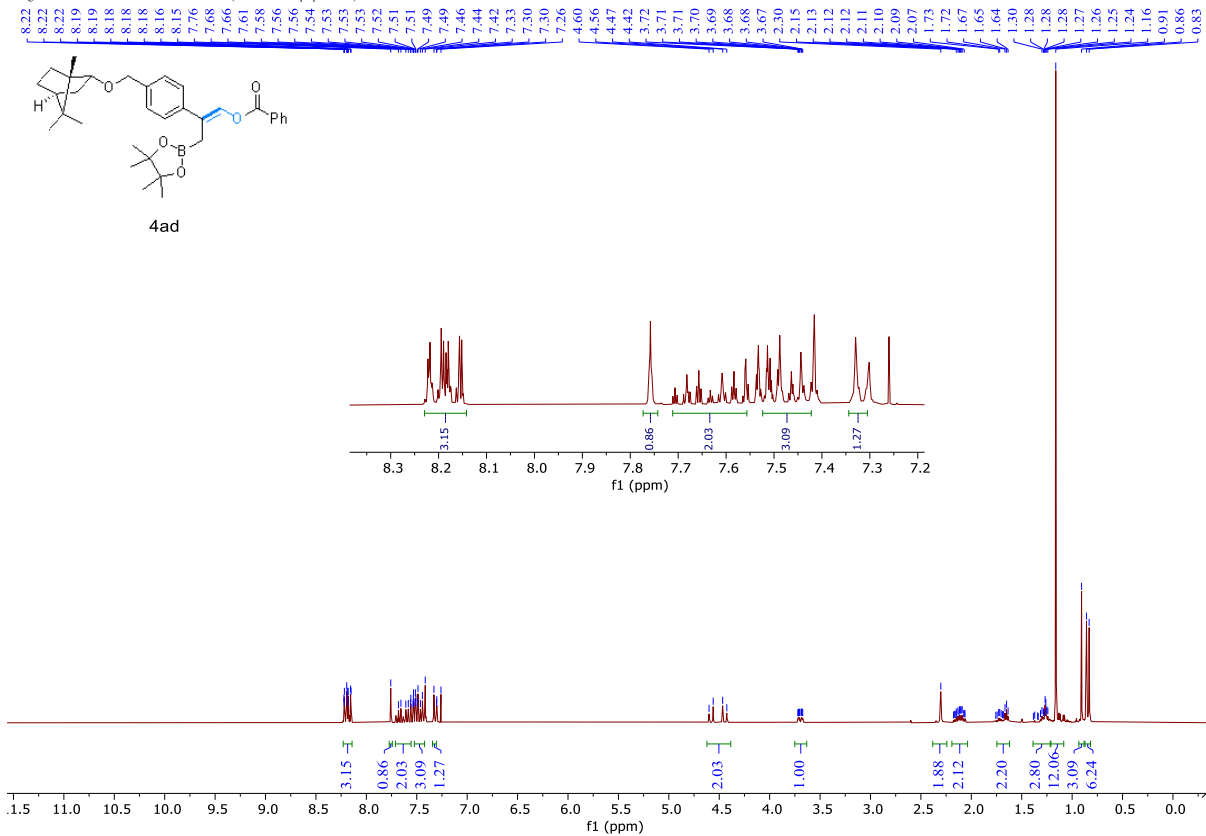

Yang Yuan YY-W-138 — C13CPD CDC13 (C:\Bruker\TopSpin3.6.2) 2106 54 — 75.49 MHz

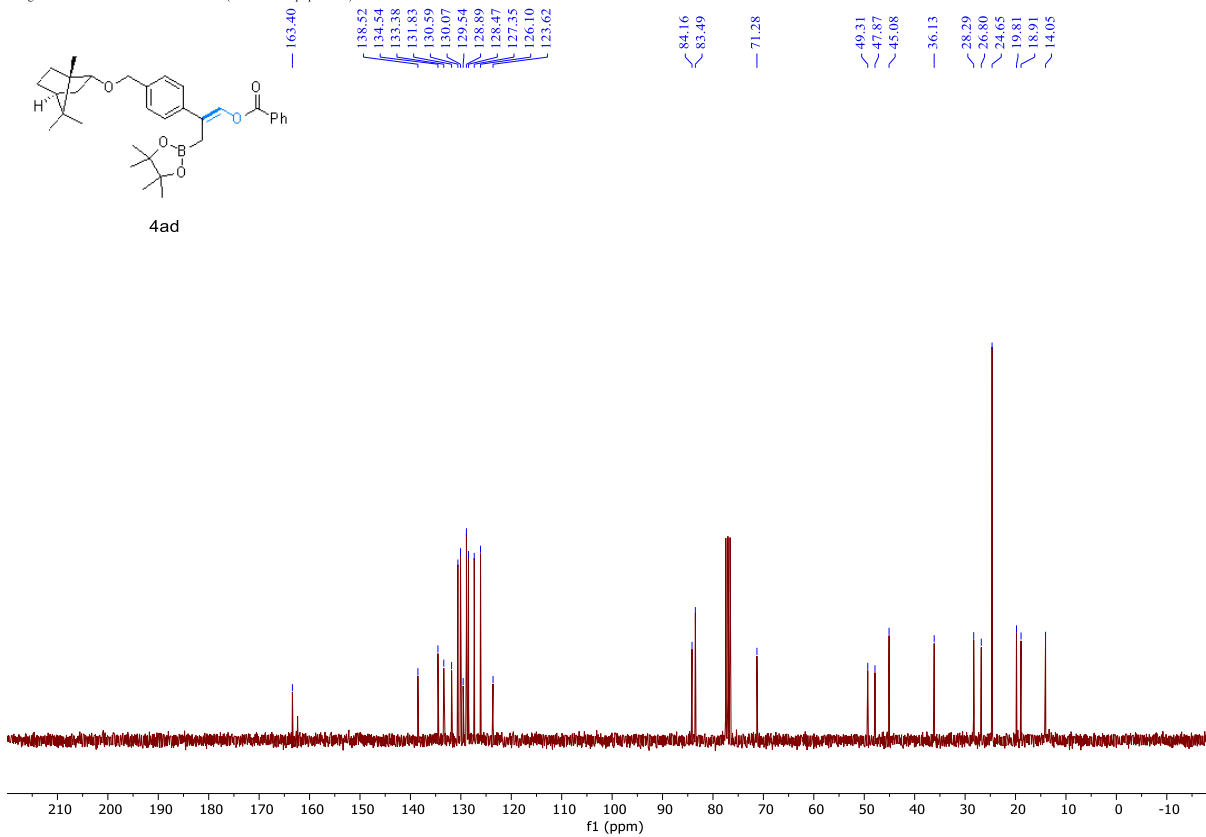

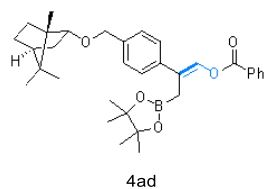

33.60

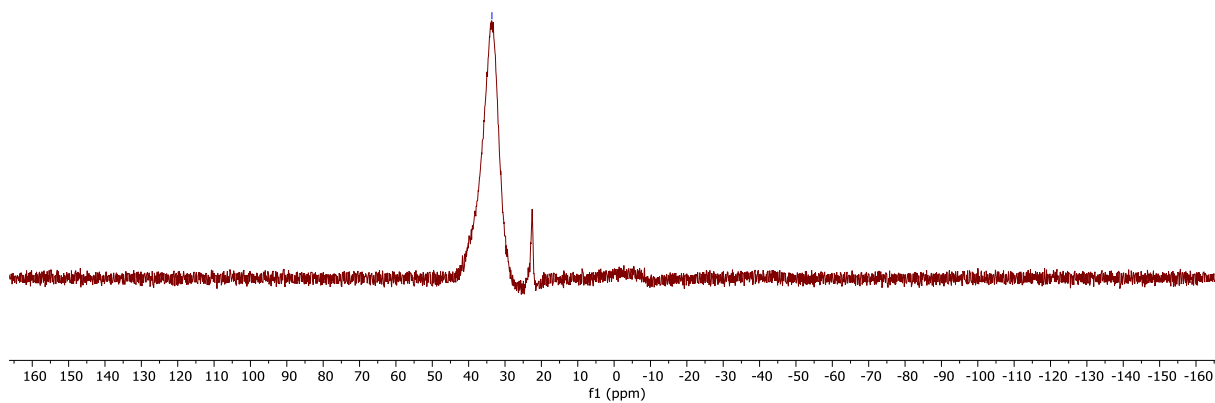

Yang Yuan YY-W-142 — PROTON CDC13 (C:\Bruker\TopSpin3.6.2) 2106 12 — 300.20 MHz

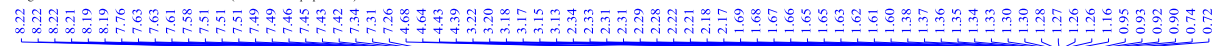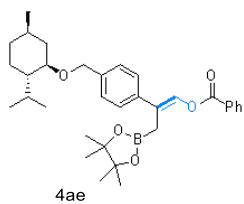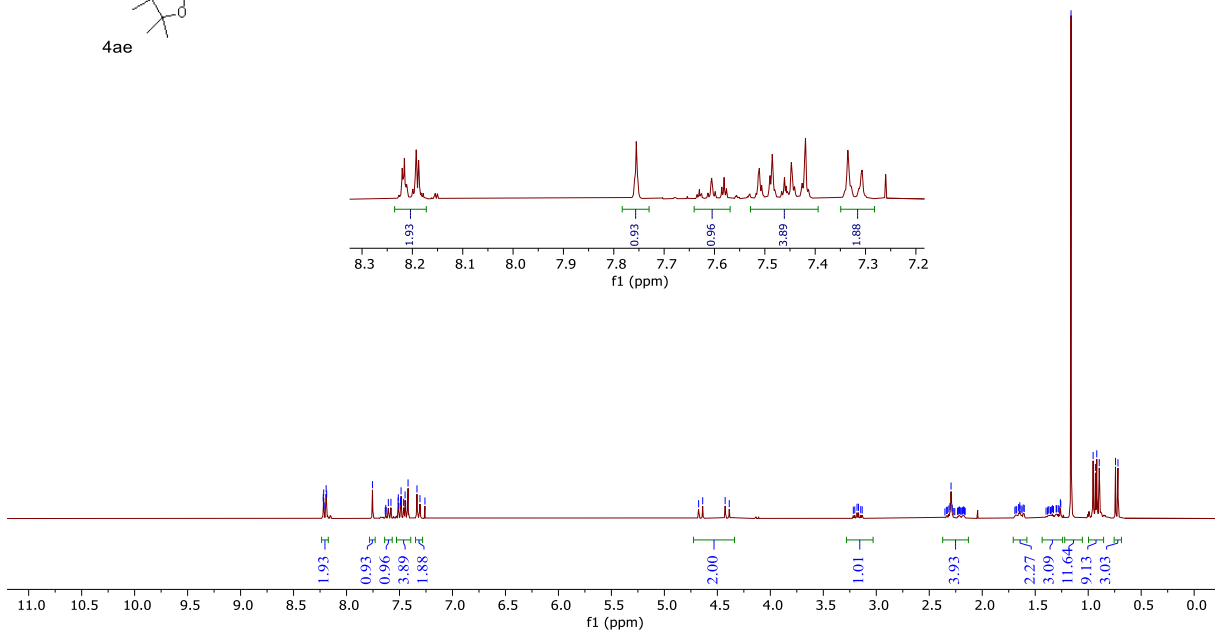

Yang Yuan YY-W-142 — C13CPD CDC13 (C:\Bruker\TopSpin3.6.2) 2106 55 — 75.49 MHz

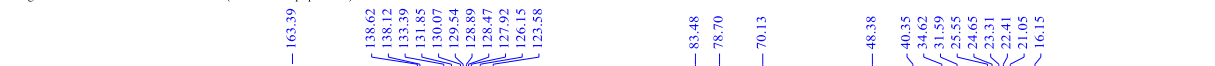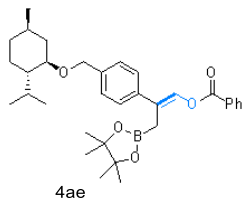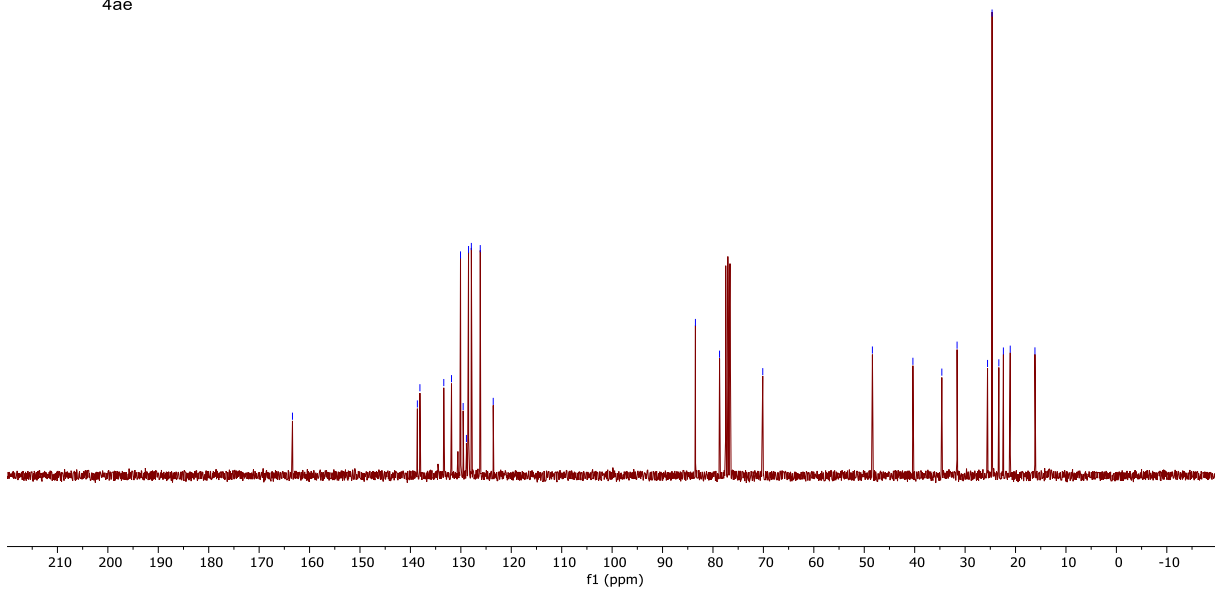

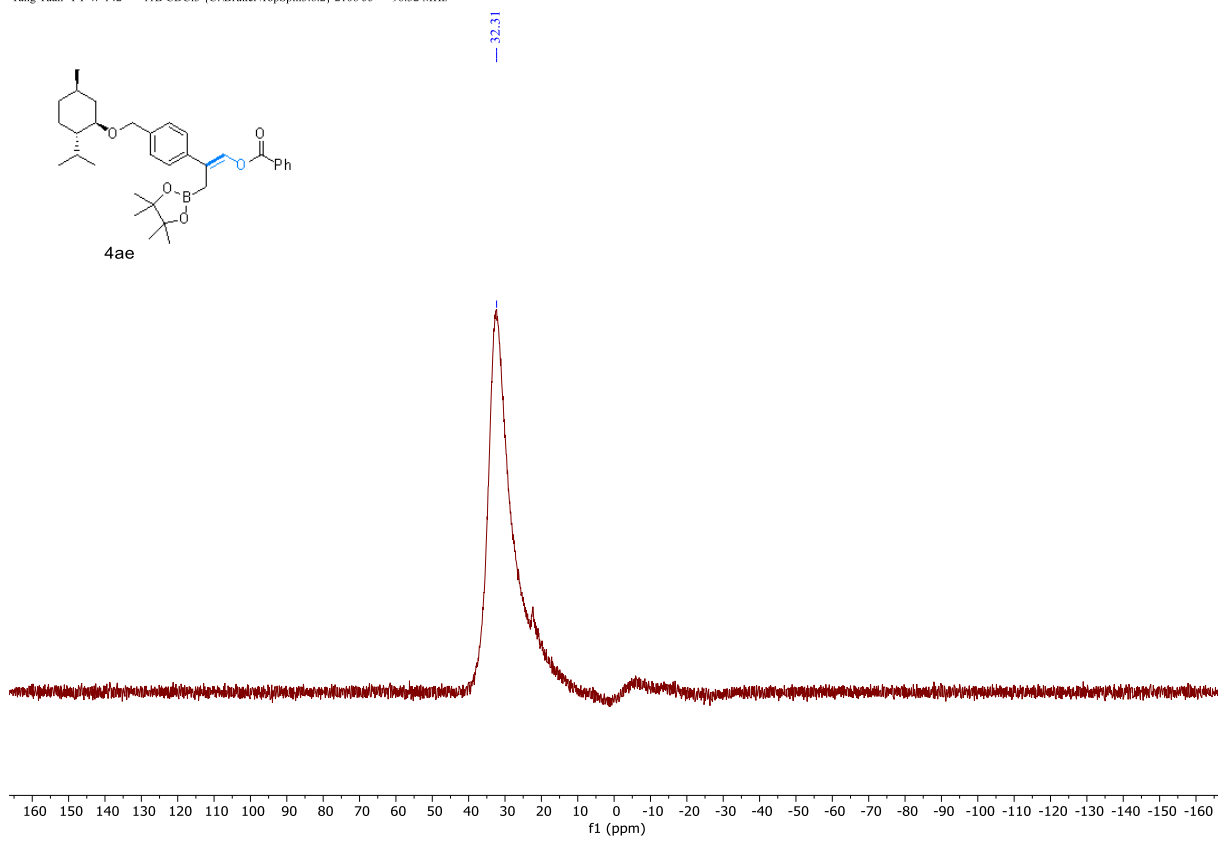



Yang Yuan YY-W-141 — PROTON CDC13 (C:\Bruker\TopSpin3.6.2) 2106 17 — 300.20 MHz

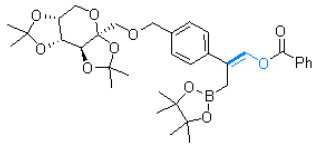

4af

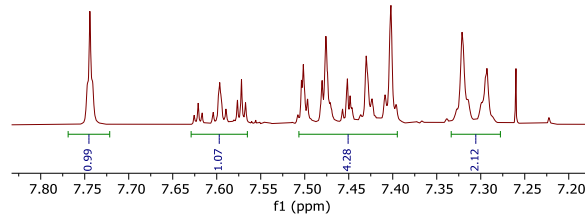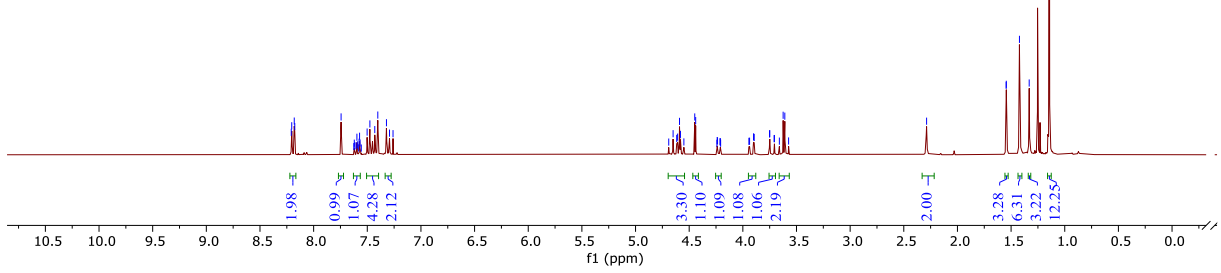

Yang Yuan YY-W-141 — C13CPD CDC13 (C:\Bruker\TopSpin3.6.2) 2106 17 — 75.49 MHz

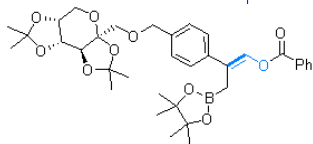

4af

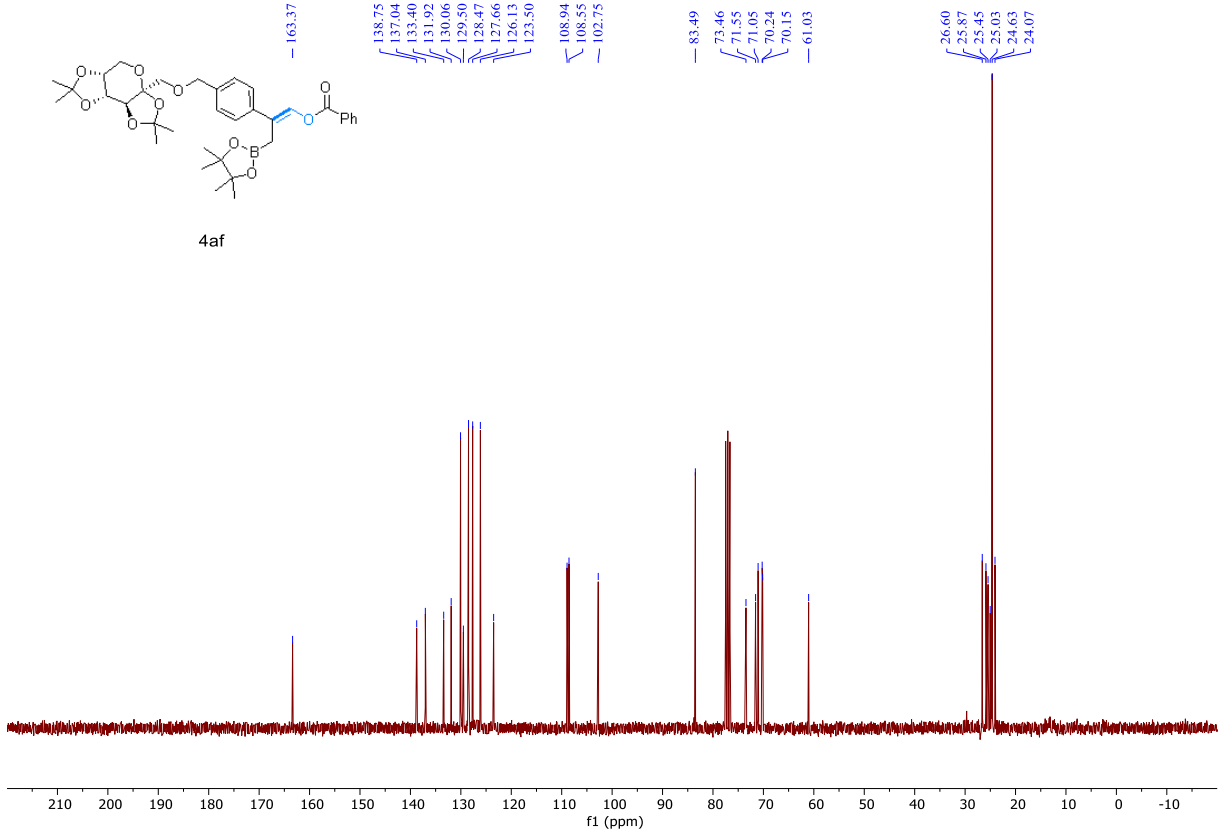

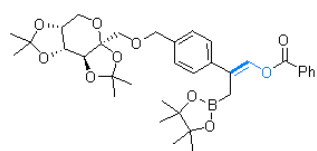

4af

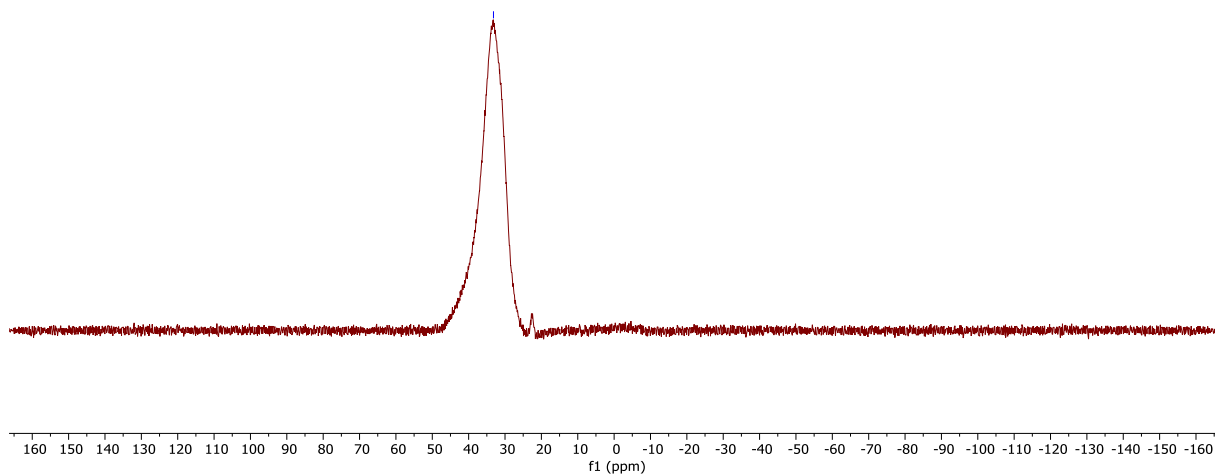

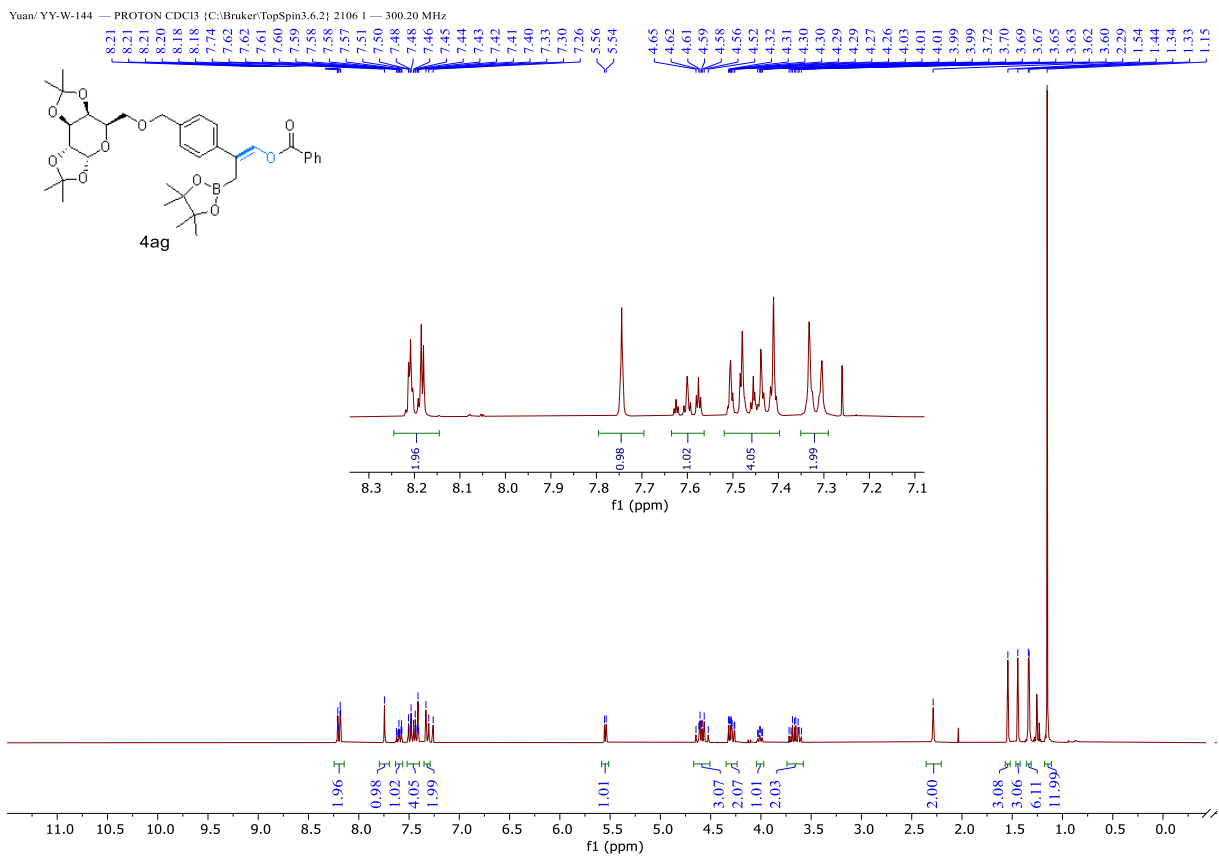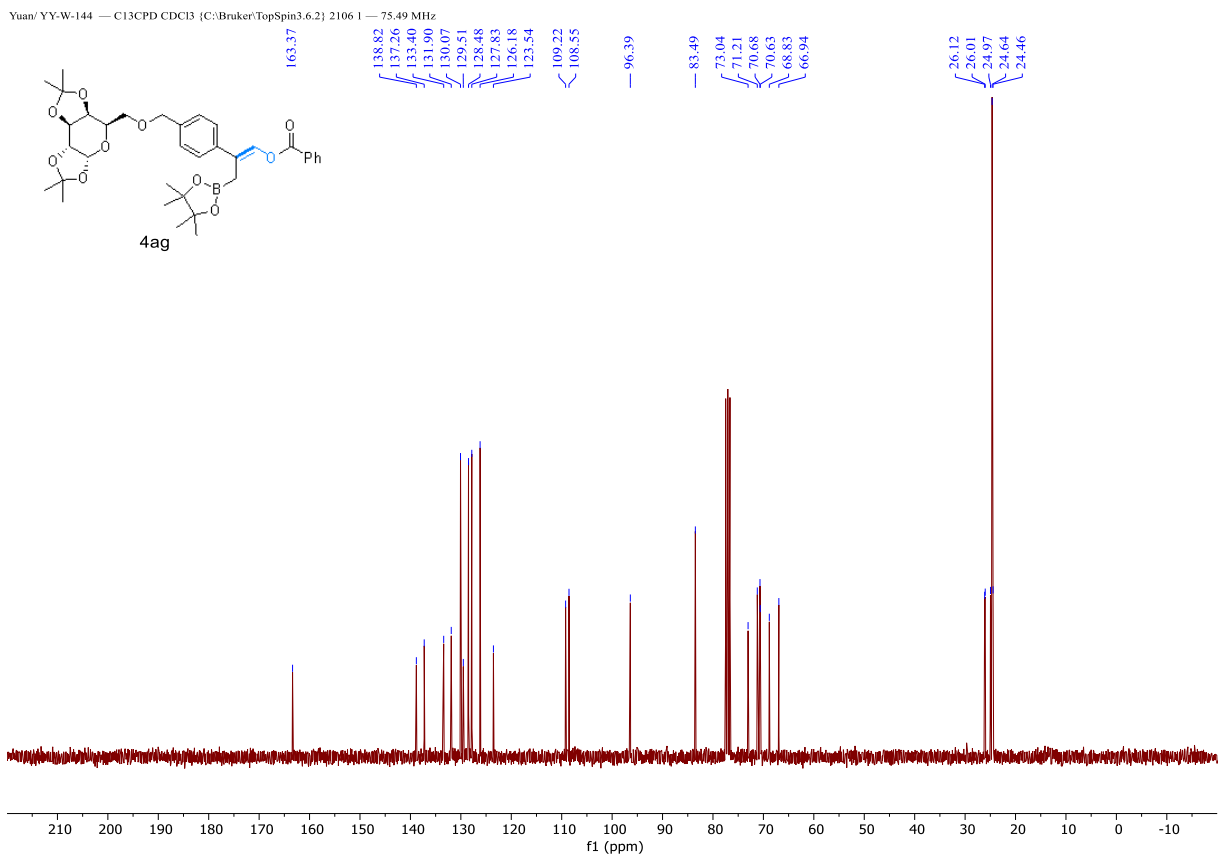

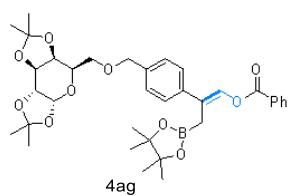

— 32.34

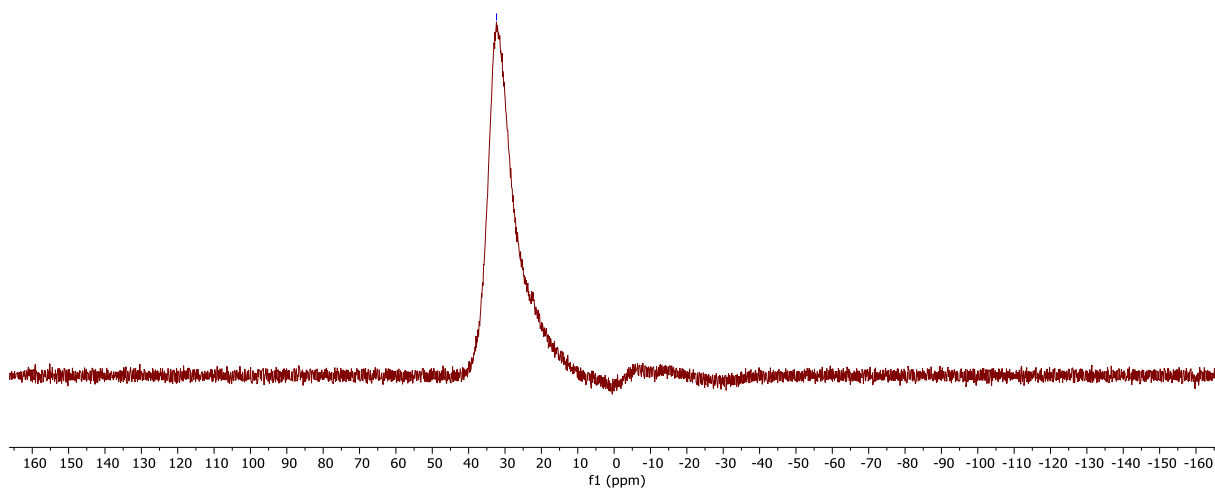

Yuan/YY-W-145 — PROTON CDCl3 (C:\Bruker\TopSpin3.6.2) 2106 2 — 300.20 MHz

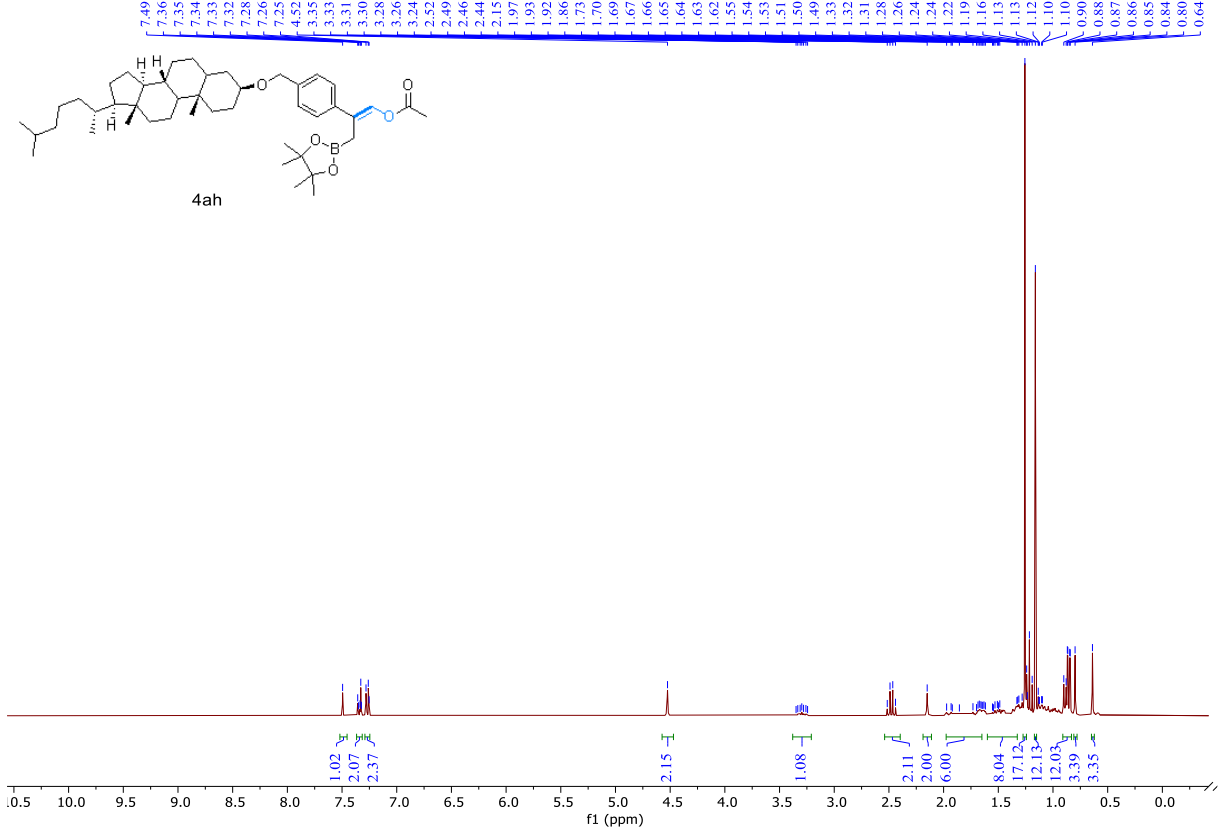

Yuan/YY-W-145 — C13CPD CDCl3 (C:\Bruker\TopSpin3.6.2) 2106 2 — 75.49 MHz

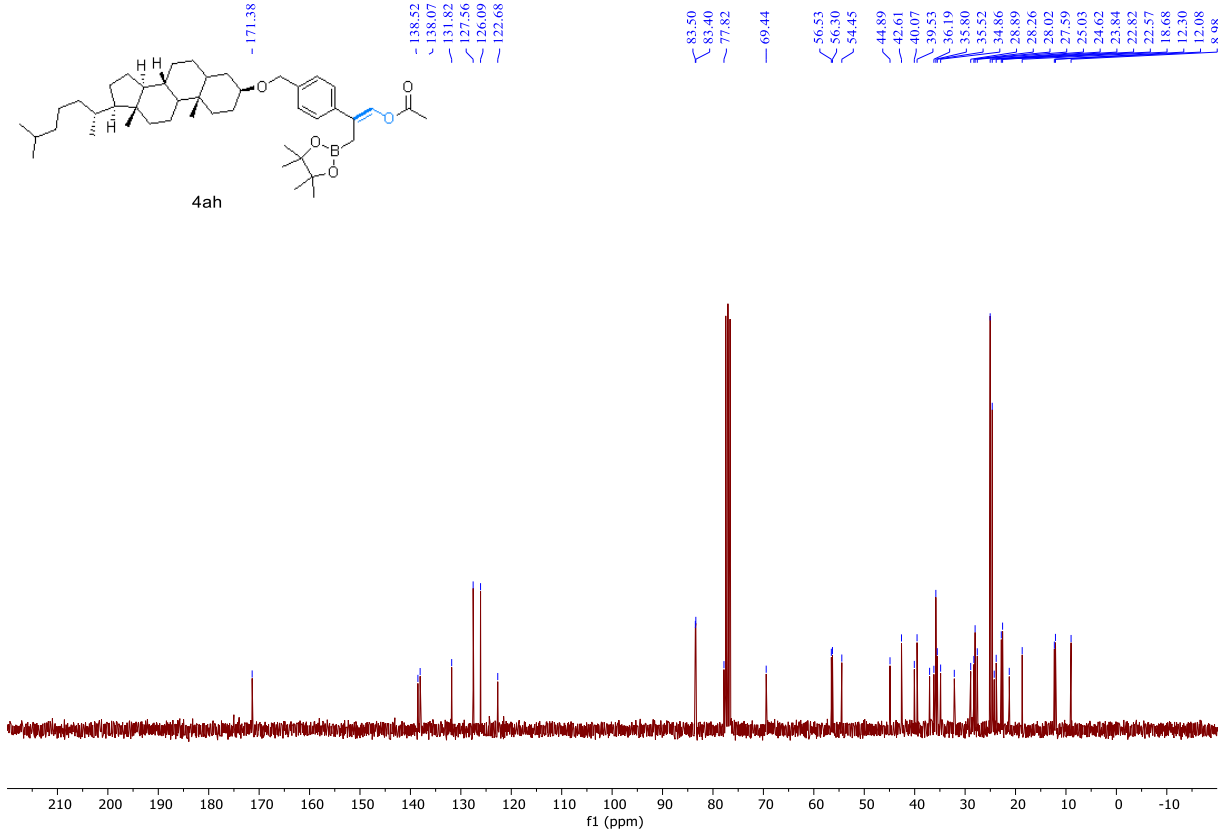

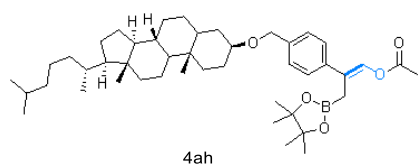

30.83

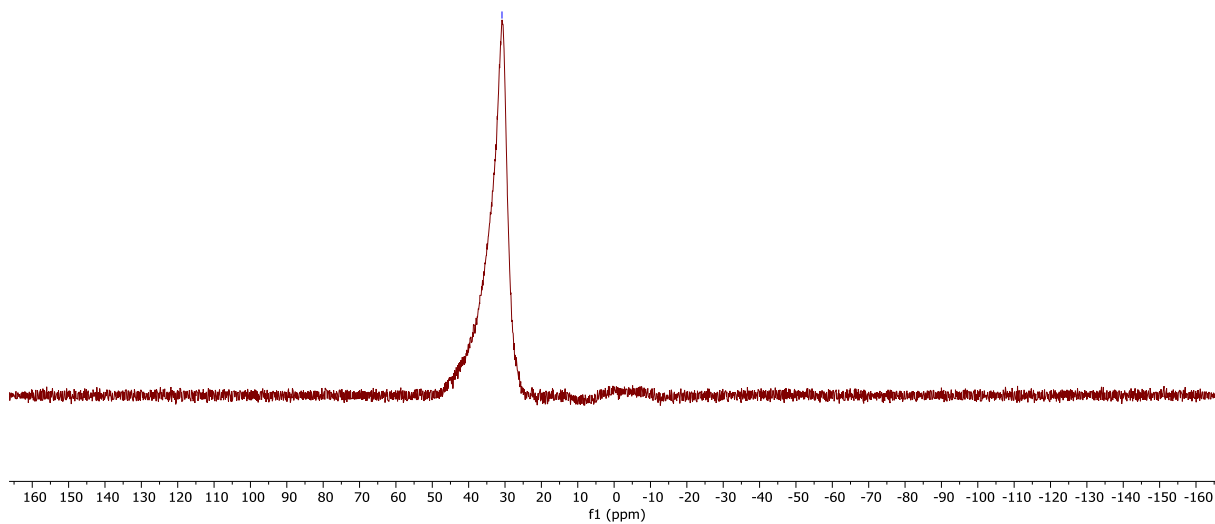

Yang Yuan YY-w-169 — Au1H CDCl3 (C:\Bruker\TopSpin3.6.2) 2107 23 — 300.13 MHz

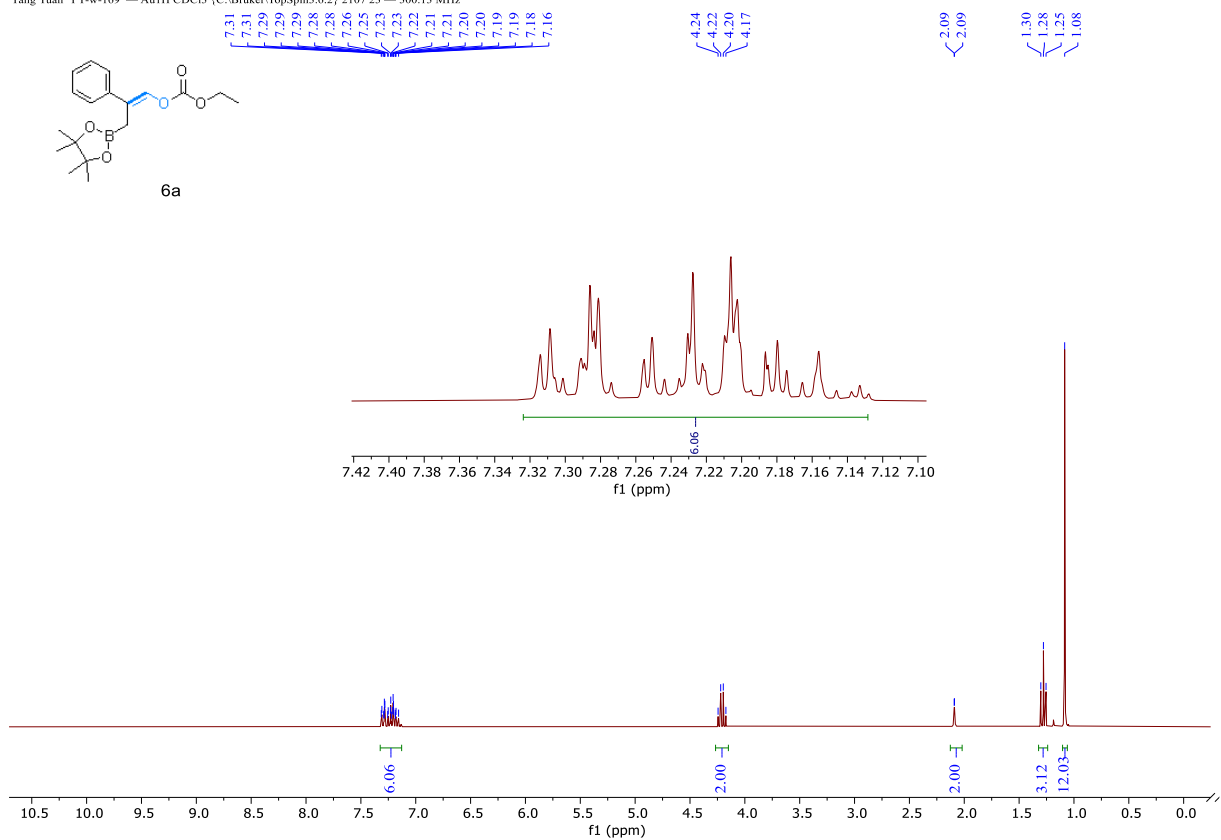

Yang Yuan YY-w-169 — Au13C CDCl3 (C:\Bruker\TopSpin3.6.2) 2107 23 — 75.48 MHz

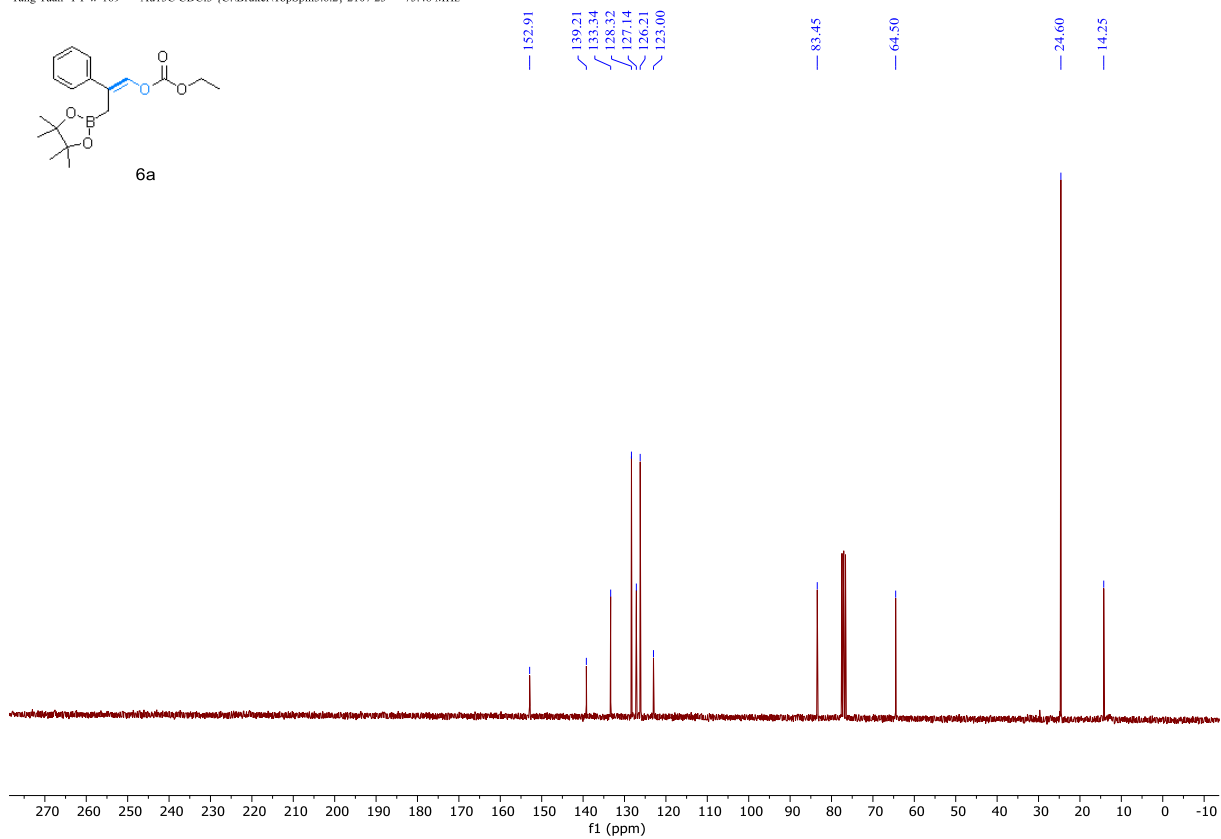

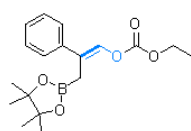

6a

— 32.72

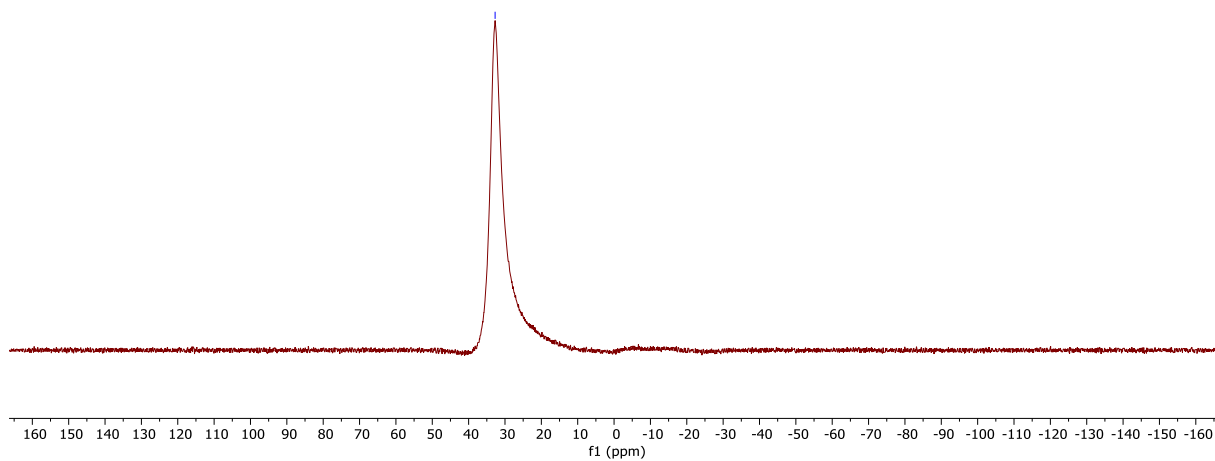



Yang Yuan YY-w-174 — PROTON CDCl3 (C:\Bruker\TopSpin3.6.2) 2107 14 — 300.20 MHz

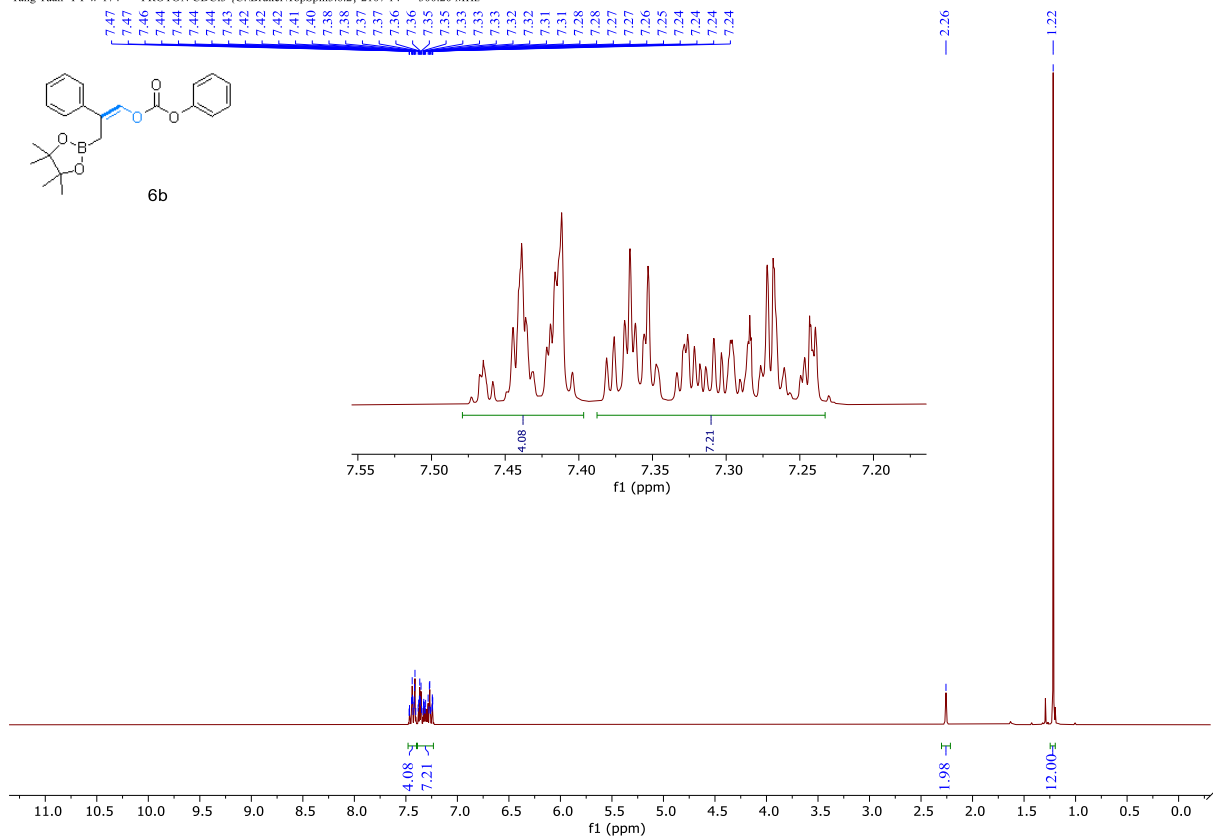

Yang Yuan YY-w-174 — C13CPD CDCl3 (C:\Bruker\TopSpin3.6.2) 2107 14 — 75.49 MHz

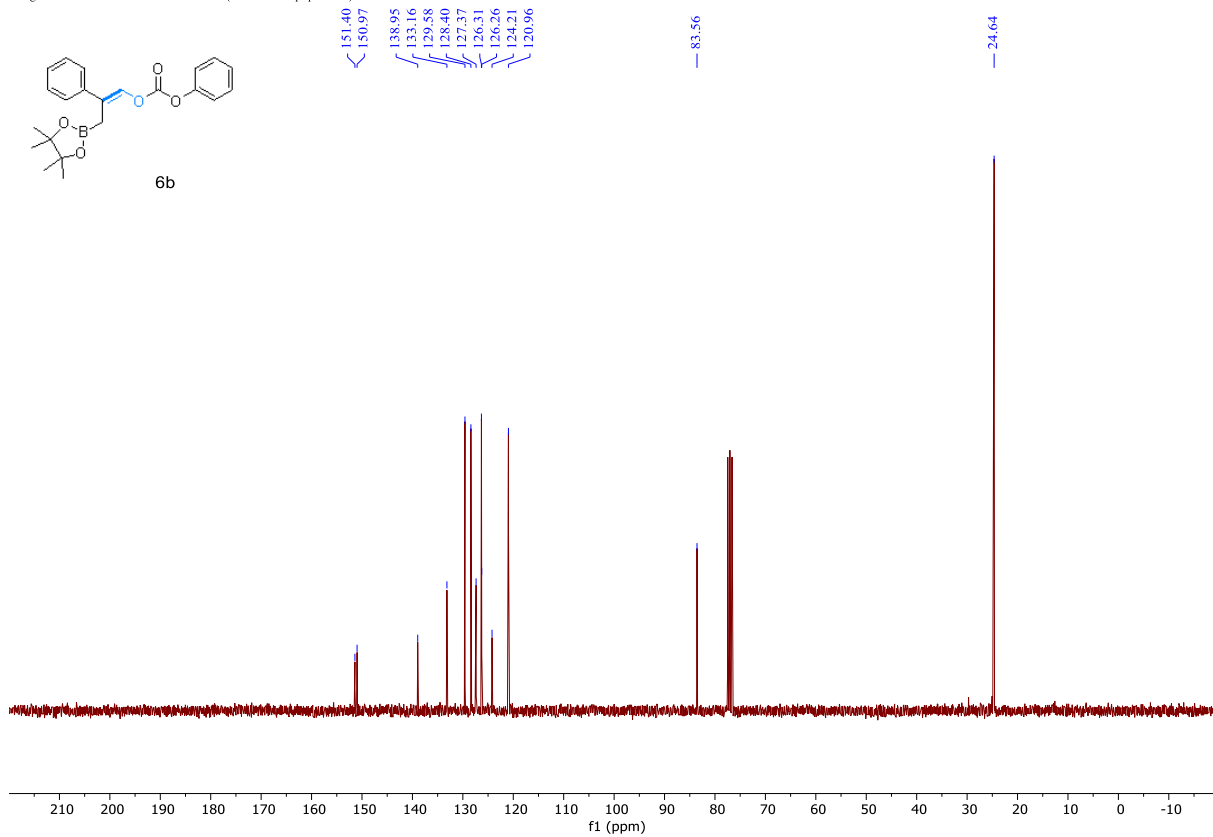

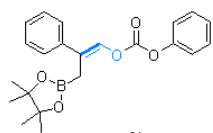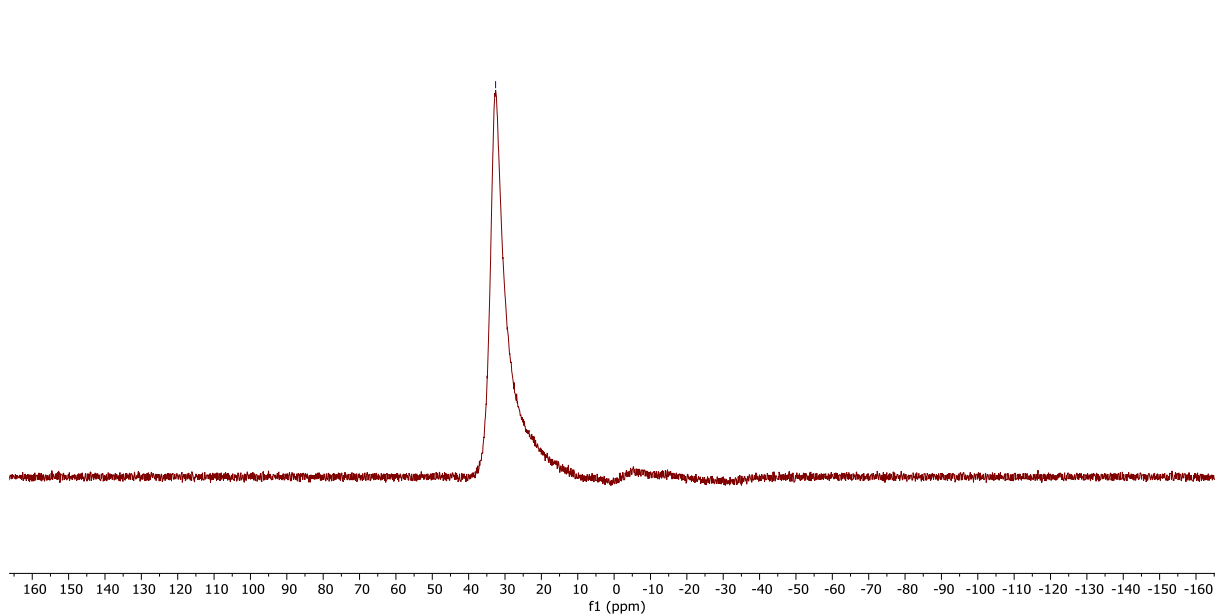

Yang Yuan YY-W-166 — Au1H CDC13 [C:\Bruker\TopSpin3.6.2] 2107 1 — 300.13 MHz

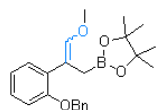

7, E/Z = 5/1

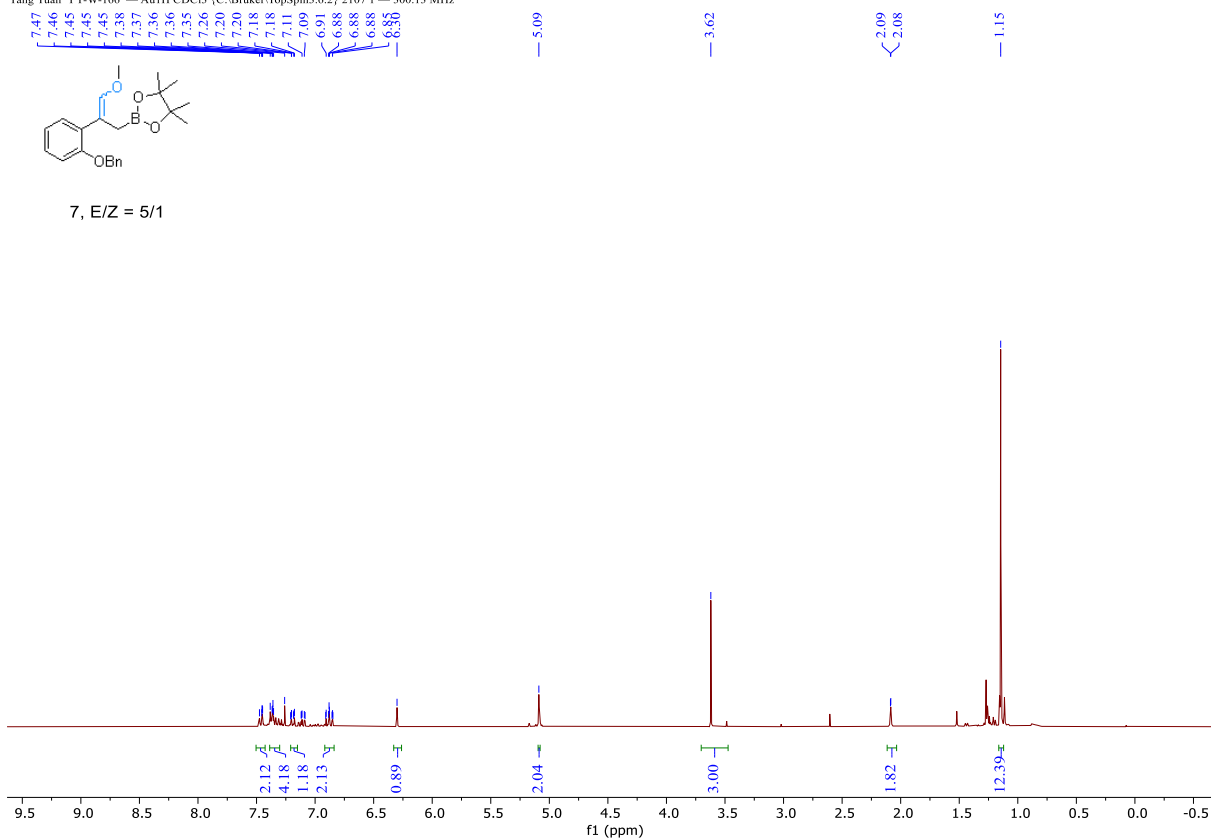

Yang Yuan YY-W-166 — Au13C CDC13 [C:\Bruker\TopSpin3.6.2] 2107 1 — 75.48 MHz

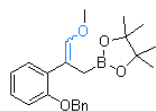

7, E/Z = 5/1

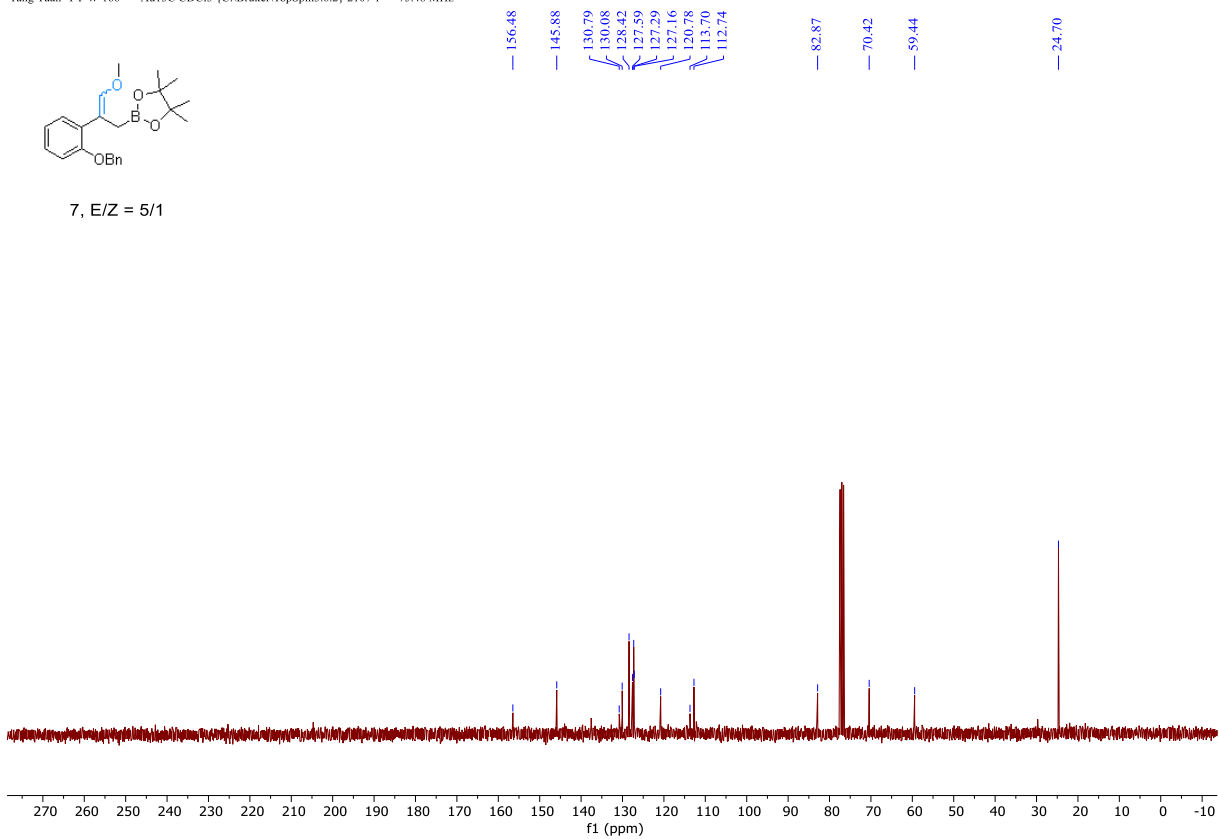



Yang Yuan YY-W-158 — PROTON CDCl<sub>3</sub> (C:\Bruker\TopSpin3.6.2) 2107 37 — 300.20 MHz

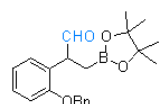

5b

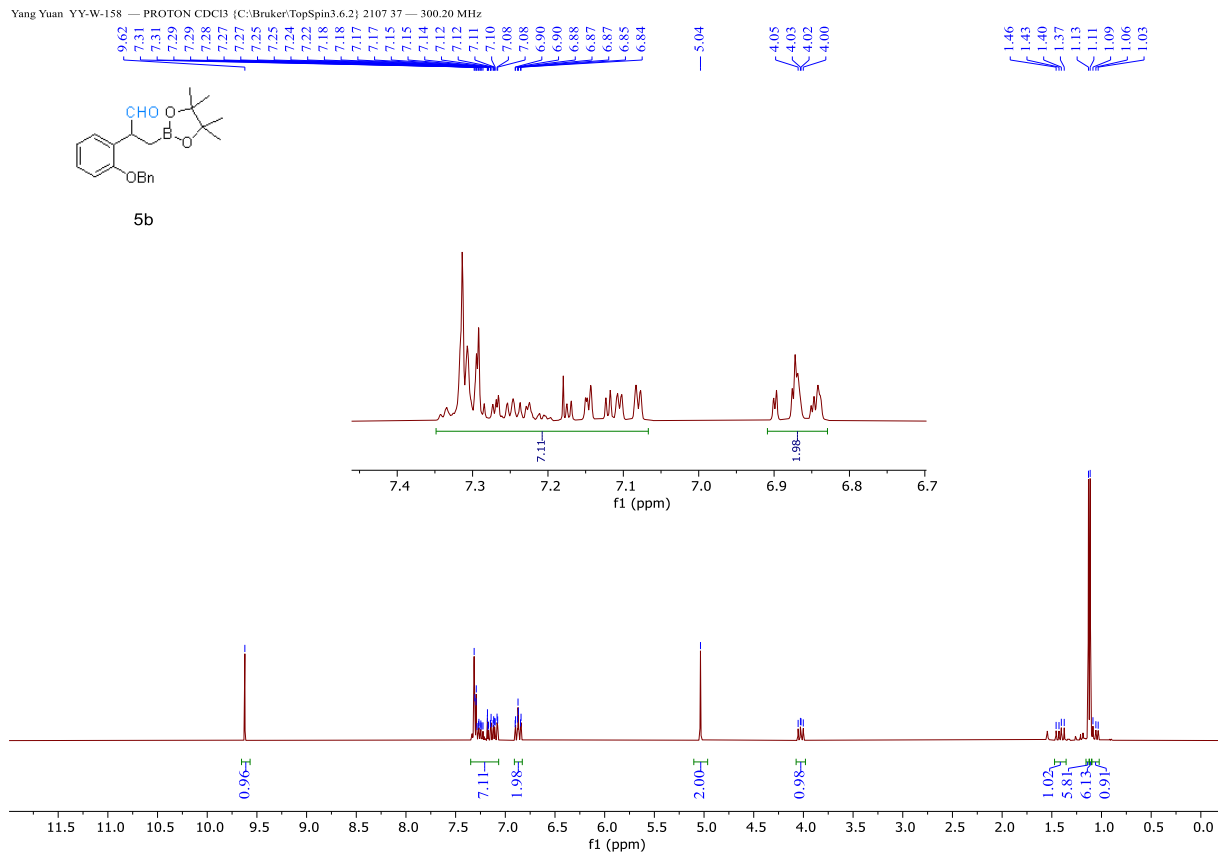

Yang Yuan YY-W-158 — C13CPD CDCl<sub>3</sub> (C:\Bruker\TopSpin3.6.2) 2107 37 — 75.49 MHz

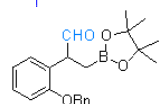

5b

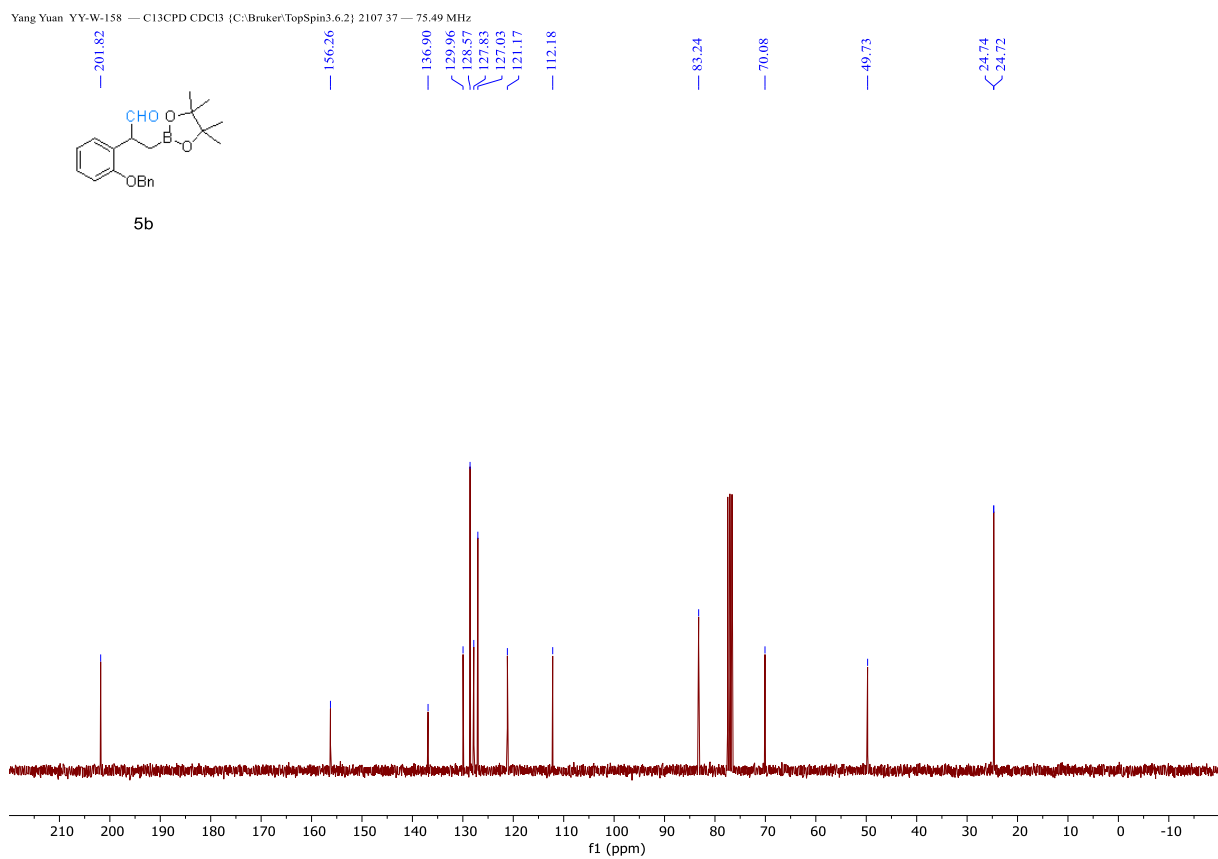

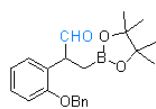

5b

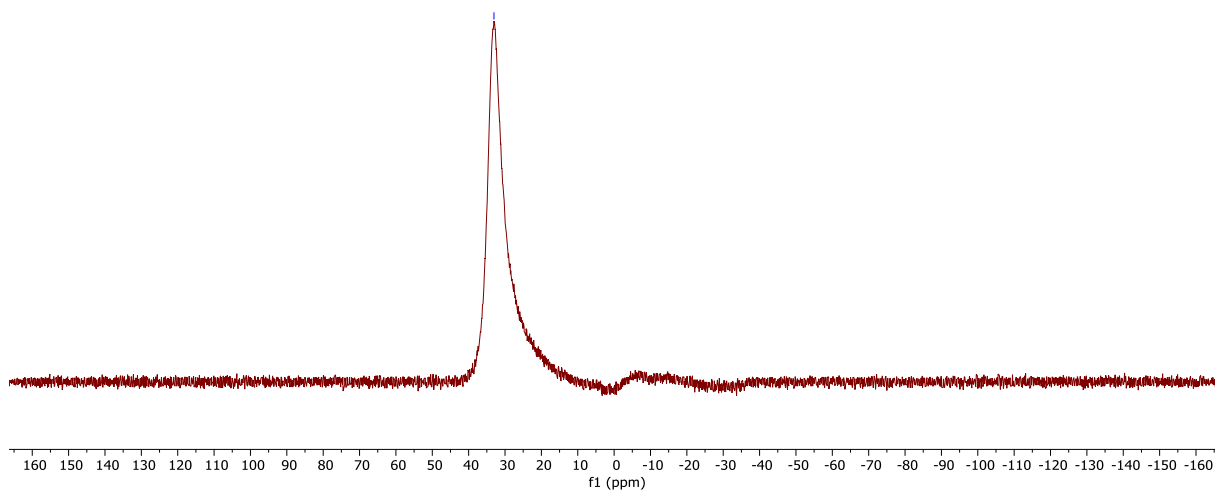

Yuan/YY-w-46 — Au<sup>1</sup>H CDCl<sub>3</sub> (C:\Bruker\TopSpin3.5\pl6) 2105 16 — 400.13 MHz

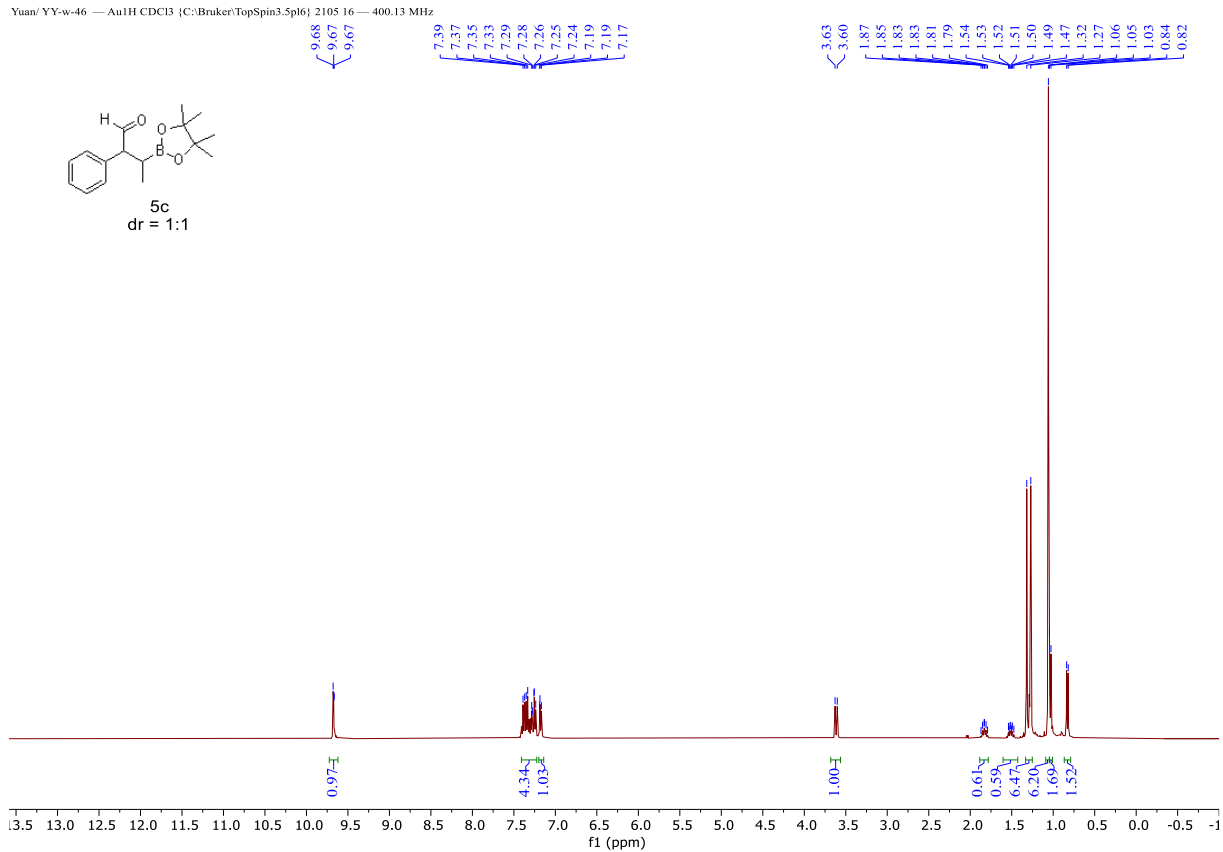

Yuan/YY-w-46 — Au<sup>13</sup>C CDCl<sub>3</sub> (C:\Bruker\TopSpin3.5\pl6) 2105 16 — 100.63 MHz

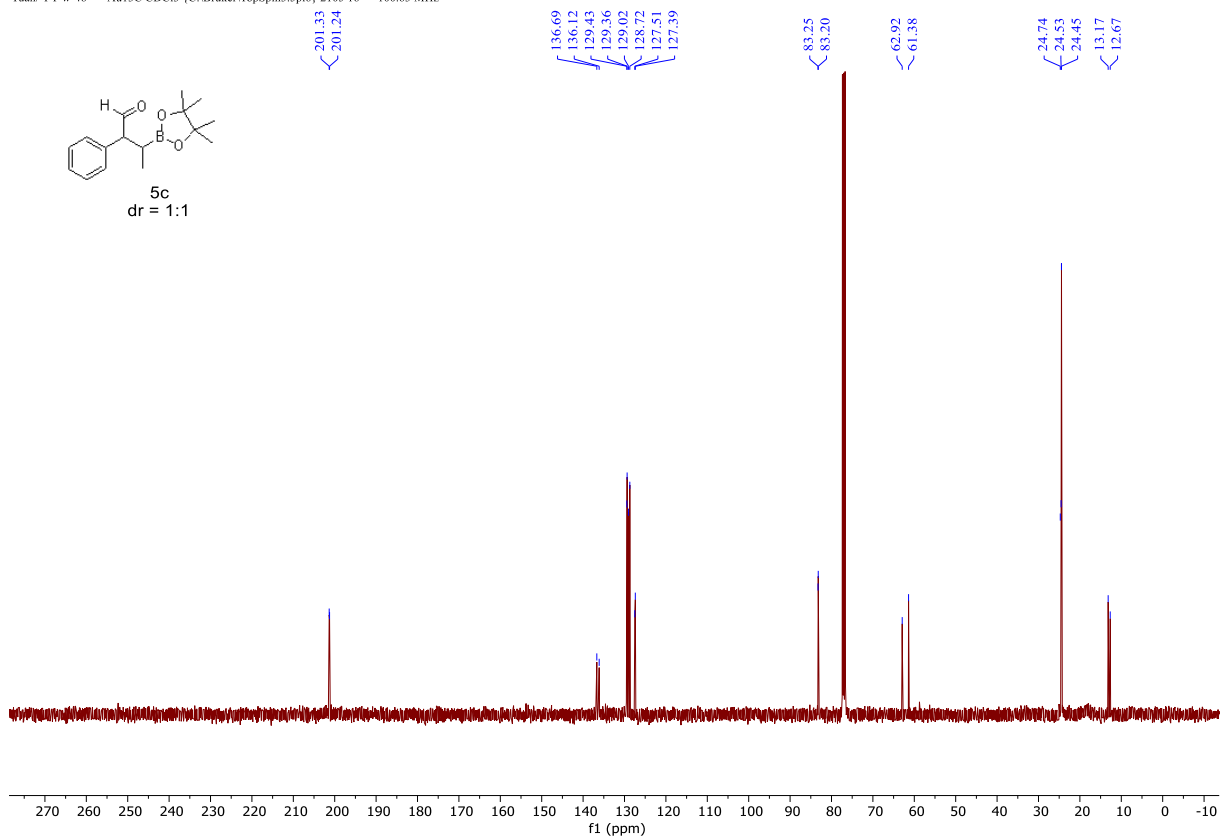

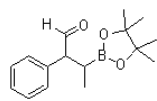

5c  
dr = 1:1

33.21

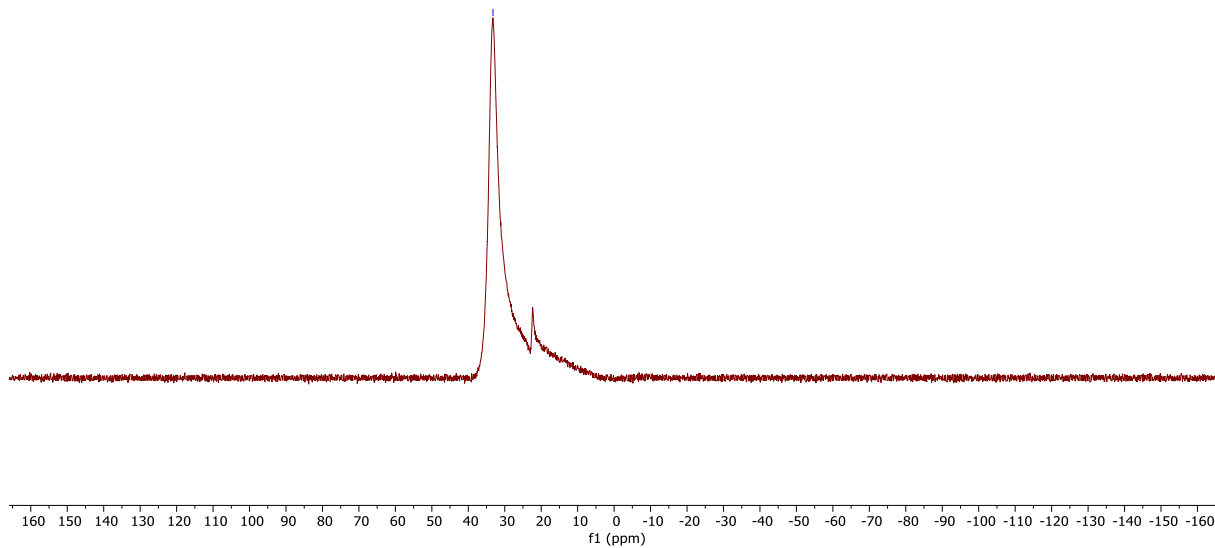

Supplement: d1sc04774d1.pdf [file d1sc04774d1.pdf]
